# Supplementary material
Source: publisher figshare collection journal article supplement (https://acs.figshare.com/ndownloader/files/14479058)
Supplement: Supplementary file 1 [file 14479058]

## SUPPLEMENTARY INFORMATION FOR

### **Rational reprogramming *O*-methylation regioselectivity for combinatorial**

### **biosynthetic tailoring of benzenediol lactone scaffolds**

Xiaojing Wang<sup>a,b,c,1</sup>, Chen Wang<sup>a,b,1</sup>, Lixin Duan<sup>b,d,1</sup>, Liwen Zhang<sup>a</sup>, Hang Liu<sup>a,b</sup>, Ya-ming Xu<sup>b</sup>,  
Qingpei Liu<sup>b,e</sup>, Tonglin Mao<sup>c</sup>, Wei Zhang<sup>a</sup>, Ming Chen<sup>a</sup>, Min Lin<sup>a</sup>, A.A. Leslie Gunatilaka<sup>b</sup>, Yuquan  
Xu<sup>a\*</sup>, and István Molnár<sup>b\*</sup>

<sup>a</sup> Biotechnology Research Institute, Chinese Academy of Agricultural Sciences, 12 Zhongguancun  
South Street, Beijing 100081, P.R. China

<sup>b</sup> Southwest Center for Natural Products Research, University of Arizona, 250 E. Valencia Rd.,  
Tucson, AZ 85706, USA

<sup>c</sup> State Key Laboratory of Plant Physiology and Biochemistry, Department of Plant Sciences,  
College of Biological Sciences, China Agricultural University, Beijing 100193, P.R. China

<sup>d</sup> Guangzhou University of Chinese Medicine, 232 Waihuan East Road, Guangzhou University  
City, Panyu District, Guangzhou 510006, P.R. China

<sup>e</sup> Key Laboratory of Environment Correlative Dietology, College of Food Science and Technology  
, Huazhong Agricultural University, Wuhan 430070, P.R. China

<sup>1</sup> These authors contribute equally to this work.

\* Corresponding authors: I. Molnár ([imolnar@email.arizona.edu](mailto:imolnar@email.arizona.edu)), Tel: +1 (520) 621-9932; and Y.  
Xu ([xuyuquan@caas.cn](mailto:xuyuquan@caas.cn)), Tel: +86 (010) 8210-9850.

## Contents

|        |                                                                                                                    |    |
|--------|--------------------------------------------------------------------------------------------------------------------|----|
| 1      | SI Materials and Methods.....                                                                                      | 7  |
| 1.1    | Molecular biology, microbiology and bioinformatics.....                                                            | 7  |
| 1.1.1  | Construction of <i>Saccharomyces cerevisiae</i> expression vectors. ....                                           | 7  |
| 1.1.2  | Total biosynthesis and biotransformation. ....                                                                     | 8  |
| 1.1.3  | OMT expression in <i>E. coli</i> and protein purification.....                                                     | 9  |
| 1.1.4  | Protein structure modeling. ....                                                                                   | 10 |
| 1.2    | Isolation and characterization of <i>O</i> -methylated products.....                                               | 11 |
| 1.2.1  | General methods. ....                                                                                              | 11 |
| 1.2.2  | Lasiodiplodin ( <b>1a</b> ).....                                                                                   | 12 |
| 1.2.3  | 5- <i>O</i> -Methyl-desmethyllasiodiplodin ( <b>1b</b> ).....                                                      | 13 |
| 1.2.4  | 3,5-Di- <i>O</i> -methyl-desmethyllasiodiplodin ( <b>1c</b> ).....                                                 | 13 |
| 1.2.5  | 3- <i>O</i> -Methylradiplodin ( <b>2a</b> ) .....                                                                  | 14 |
| 1.2.6  | 5- <i>O</i> -Methylradiplodin ( <b>2b</b> ) .....                                                                  | 14 |
| 1.2.7  | 3,5-Di- <i>O</i> -methylradiplodin ( <b>2c</b> ).....                                                              | 14 |
| 1.2.8  | 14,15-Dehydro-3- <i>O</i> -methylzearalenol ( <b>3a</b> ) .....                                                    | 15 |
| 1.2.9  | 14,15-Dehydro-5- <i>O</i> -methylzearalenol ( <b>3b</b> ) .....                                                    | 15 |
| 1.2.10 | 14,15-Dehydro-3,5-di- <i>O</i> -methylzearalenol ( <b>3c</b> ) .....                                               | 16 |
| 1.2.11 | 3- <i>O</i> -Methylzearalenol ( <b>4a</b> ) .....                                                                  | 16 |
| 1.2.12 | 5- <i>O</i> -Methylzearalenol ( <b>4b</b> ) .....                                                                  | 16 |
| 1.2.13 | 3,5-Di- <i>O</i> -methylzearalenol ( <b>4c</b> ).....                                                              | 17 |
| 1.2.14 | 3- <i>O</i> -Methylasicicol ( <b>5a</b> ) .....                                                                    | 17 |
| 1.2.15 | 7- <i>O</i> -methyllasilarin ( <b>6a</b> ) .....                                                                   | 17 |
| 1.2.16 | 5- <i>O</i> -methyllasilarin ( <b>6b</b> ) .....                                                                   | 18 |
| 1.2.17 | 5,7-Di- <i>O</i> -methyllasilarin ( <b>6c</b> ) .....                                                              | 18 |
| 1.2.18 | 7-[( <i>R,E</i> )-6-Hydroxyhept-1-en-1-yl]-3- <i>O</i> -methylresorcylic acid ethyl ester ( <b>7a</b> )<br>18      |    |
| 1.2.19 | 7-[( <i>R,E</i> )-6-Hydroxyhept-1-en-1-yl]-5- <i>O</i> -methylresorcylic acid ethyl ester ( <b>7b</b> )<br>19      |    |
| 1.2.20 | 7-[( <i>R,E</i> )-6-Hydroxyhept-1-en-1-yl]-3,5-di- <i>O</i> -methylresorcylic acid ethyl ester ( <b>7c</b> )<br>19 |    |
| 1.2.21 | 7-[( <i>S,E</i> )-6-Hydroxyhept-1-en-1-yl]-resorcylic acid ethyl ester ( <b>8</b> ) .....                          | 20 |

|        |                                                                                                                                          |    |
|--------|------------------------------------------------------------------------------------------------------------------------------------------|----|
| 1.2.22 | 7-[( <i>S,E</i> )-6-Hydroxyhept-1-en-1-yl]-3- <i>O</i> -methylresorcylic acid ethyl ester ( <b>8a</b> )                                  | 20 |
| 1.2.23 | 7-[( <i>S,E</i> )-6-Hydroxyhept-1-en-1-yl]-5- <i>O</i> -methylresorcylic acid ethyl ester ( <b>8b</b> )                                  | 21 |
| 1.2.24 | 7-[( <i>S,E</i> )-6-Hydroxyhept-1-en-1-yl]-3,5-di- <i>O</i> -methylresorcylic acid ethyl ester ( <b>8c</b> )                             | 21 |
| 1.3    | Structure elucidation.....                                                                                                               | 21 |
| 2      | SI Tables.....                                                                                                                           | 27 |
|        | Table S1. Mutations engineered into LtOMT.....                                                                                           | 27 |
|        | Table S2. <sup>1</sup> H NMR (400 MHz) and <sup>13</sup> C NMR (100 MHz) data.....                                                       | 28 |
|        | Table S2.1. Compounds <b>1a</b> , <b>1b</b> and <b>1c</b> (in methanol- <i>d</i> <sub>4</sub> ).....                                     | 28 |
|        | Table S2.2. Compounds <b>2a</b> , <b>2b</b> and <b>2c</b> (in CDCl <sub>3</sub> ).....                                                   | 29 |
|        | Table S2.3. Compounds <b>3a</b> , <b>3b</b> and <b>3c</b> (in DMSO- <i>d</i> <sub>6</sub> ).....                                         | 30 |
|        | Table S2.4. Compounds <b>4a</b> , <b>4b</b> , <b>4c</b> (in methanol- <i>d</i> <sub>4</sub> ) and <b>5a</b> (in CDCl <sub>3</sub> )..... | 31 |
|        | Table S2.5. Compounds <b>6a</b> , <b>6b</b> and <b>6c</b> (in methanol- <i>d</i> <sub>4</sub> ).....                                     | 32 |
|        | Table S2.6. Compounds <b>7a</b> , <b>7b</b> and <b>7c</b> (in methanol- <i>d</i> <sub>4</sub> ).....                                     | 33 |
|        | Table S2.7. Compounds <b>8a</b> , <b>8b</b> and <b>8c</b> (in methanol- <i>d</i> <sub>4</sub> ).....                                     | 34 |
|        | Table S3. Combinatorial methylation with LtOMT and HsOMT.....                                                                            | 35 |
|        | Table S4. Methylation of the model substrate DLD (1) with mutant LtOMT enzymes.....                                                      | 39 |
|        | Table S5. Combinatorial methylation with selected LtOMT variants.....                                                                    | 41 |
|        | Table S6. Primers used in this study.....                                                                                                | 46 |
| 3      | SI Figures.....                                                                                                                          | 49 |
|        | Figure S1. Compounds not accepted as substrates by LtOMT and HsOMT.....                                                                  | 49 |
|        | Figure S2. Influence of preexisting methylation on the activities of LtOMT and HsOMT.....                                                | 52 |
|        | Figure S3. Topology of LtOMT and HsOMT.....                                                                                              | 54 |
|        | Figure S4. Docking models of DLD and SAM for LtOMT and HsOMT.....                                                                        | 55 |
|        | Figure S5. SDS-PAGE analysis of purified methyltransferases.....                                                                         | 56 |
|        | Figure S6. Chemical structures and key HMBC (→) and NOE (<--->) correlations of isolated compounds.....                                  | 57 |
|        | Figure S7. NMR spectra.....                                                                                                              | 58 |
|        | Figure S7.1. <sup>1</sup> H NMR spectrum of compound <b>1a</b> in methanol- <i>d</i> <sub>4</sub> .....                                  | 58 |
|        | Figure S7.2. <sup>13</sup> C NMR spectrum of compound <b>1a</b> in methanol- <i>d</i> <sub>4</sub> .....                                 | 59 |

|               |                                                                                            |    |
|---------------|--------------------------------------------------------------------------------------------|----|
| Figure S7.3.  | $^1\text{H}$ NMR spectrum of compound <b>1b</b> in methanol- $d_4$ .....                   | 60 |
| Figure S7.4.  | $^{13}\text{C}$ NMR spectrum of compound <b>1b</b> in methanol- $d_4$ .....                | 61 |
| Figure S7.5.  | HSQC spectrum of compound <b>1b</b> in methanol- $d_4$ .....                               | 62 |
| Figure S7.6.  | HMBC spectrum of compound <b>1b</b> in methanol- $d_4$ .....                               | 63 |
| Figure S7.7.  | 1D NOESY spectrum of compound <b>1b</b> in methanol- $d_4$ .....                           | 64 |
| Figure S7.8.  | $^1\text{H}$ NMR spectrum of compound <b>1c</b> in methanol- $d_4$ .....                   | 65 |
| Figure S7.9.  | $^{13}\text{C}$ NMR spectrum of compound <b>1c</b> in methanol- $d_4$ .....                | 66 |
| Figure S7.10. | HMBC spectrum of compound <b>1c</b> in methanol- $d_4$ .....                               | 67 |
| Figure S7.11. | $^1\text{H}$ NMR spectrum of compound <b>2a</b> in $\text{CDCl}_3$ .....                   | 68 |
| Figure S7.12. | $^{13}\text{C}$ NMR spectrum of compound <b>2a</b> in $\text{CDCl}_3$ .....                | 69 |
| Figure S7.13. | HMBC spectrum of compound <b>2a</b> in $\text{CDCl}_3$ .....                               | 70 |
| Figure S7.14. | $^1\text{H}$ NMR spectrum of compound <b>2b</b> in $\text{CDCl}_3$ .....                   | 71 |
| Figure S7.15. | $^{13}\text{C}$ NMR spectrum of compound <b>2b</b> in $\text{CDCl}_3$ .....                | 72 |
| Figure S7.16. | HSQC spectrum of compound <b>2b</b> in $\text{CDCl}_3$ .....                               | 73 |
| Figure S7.17. | HMBC spectrum of compound <b>2b</b> in $\text{CDCl}_3$ .....                               | 74 |
| Figure S7.18. | $^1\text{H}$ NMR spectrum of compound <b>2c</b> in $\text{CDCl}_3$ .....                   | 75 |
| Figure S7.19. | $^{13}\text{C}$ NMR spectrum of compound <b>2c</b> in $\text{CDCl}_3$ .....                | 76 |
| Figure S7.20. | DEPT 135 spectrum of compound <b>2c</b> in $\text{CDCl}_3$ .....                           | 77 |
| Figure S7.21. | $^1\text{H}$ - $^1\text{H}$ COSY spectrum of compound <b>2c</b> in $\text{CDCl}_3$ .....   | 78 |
| Figure S7.22. | HSQC spectrum of compound <b>2c</b> in $\text{CDCl}_3$ .....                               | 79 |
| Figure S7.23. | HMBC spectrum of compound <b>2c</b> in $\text{CDCl}_3$ .....                               | 80 |
| Figure S7.24. | $^1\text{H}$ NMR spectrum of compound <b>3a</b> in $\text{DMSO}-d_6$ .....                 | 81 |
| Figure S7.25. | $^{13}\text{C}$ NMR spectrum of compound <b>3a</b> in $\text{DMSO}-d_6$ .....              | 82 |
| Figure S7.26. | $^1\text{H}$ - $^1\text{H}$ COSY spectrum of compound <b>3a</b> in $\text{DMSO}-d_6$ ..... | 83 |
| Figure S7.27. | HSQC spectrum of compound <b>3a</b> in $\text{DMSO}-d_6$ .....                             | 84 |
| Figure S7.28. | HMBC spectrum of compound <b>3a</b> in $\text{DMSO}-d_6$ .....                             | 85 |
| Figure S7.29. | $^1\text{H}$ NMR spectrum of compound <b>3b</b> in $\text{DMSO}-d_6$ .....                 | 86 |
| Figure S7.30. | $^{13}\text{C}$ NMR spectrum of compound <b>3b</b> in $\text{DMSO}-d_6$ .....              | 87 |
| Figure S7.31. | $^1\text{H}$ - $^1\text{H}$ COSY spectrum of compound <b>3b</b> in $\text{DMSO}-d_6$ ..... | 88 |
| Figure S7.32. | HSQC spectrum of compound <b>3b</b> in $\text{DMSO}-d_6$ .....                             | 89 |
| Figure S7.33. | HMBC spectrum of compound <b>3b</b> in $\text{DMSO}-d_6$ .....                             | 90 |
| Figure S7.34. | $^1\text{H}$ NMR spectrum of compound <b>3c</b> in $\text{DMSO}-d_6$ .....                 | 91 |

|               |                                                                                            |     |
|---------------|--------------------------------------------------------------------------------------------|-----|
| Figure S7.35. | $^{13}\text{C}$ NMR spectrum of compound <b>3c</b> in $\text{DMSO}-d_6$ .....              | 92  |
| Figure S7.36. | $^1\text{H}$ - $^1\text{H}$ COSY spectrum of compound <b>3c</b> in $\text{DMSO}-d_6$ ..... | 93  |
| Figure S7.37. | HSQC spectrum of compound <b>3c</b> in $\text{DMSO}-d_6$ .....                             | 94  |
| Figure S7.38. | HMBC spectrum of compound <b>3c</b> in $\text{DMSO}-d_6$ .....                             | 95  |
| Figure S7.39. | $^1\text{H}$ NMR spectrum of compound <b>4a</b> in methanol- $d_4$ .....                   | 96  |
| Figure S7.40. | $^{13}\text{C}$ NMR spectrum of compound <b>4a</b> in methanol- $d_4$ .....                | 97  |
| Figure S7.41. | DEPT 135 spectrum of compound <b>4a</b> in methanol- $d_4$ .....                           | 98  |
| Figure S7.42. | 1D NOESY spectrum of compound <b>4a</b> in methanol- $d_4$ .....                           | 99  |
| Figure S7.43. | $^1\text{H}$ NMR spectrum of compound <b>4b</b> in methanol- $d_4$ .....                   | 100 |
| Figure S7.44. | $^{13}\text{C}$ NMR spectrum of compound <b>4b</b> in methanol- $d_4$ .....                | 101 |
| Figure S7.45. | 1D NOESY NMR spectrum of compound <b>4b</b> in methanol- $d_4$ .....                       | 102 |
| Figure S7.46. | $^1\text{H}$ NMR spectrum of compound <b>4c</b> in methanol- $d_4$ .....                   | 103 |
| Figure S7.47. | $^{13}\text{C}$ NMR spectrum of compound <b>4c</b> in methanol- $d_4$ .....                | 104 |
| Figure S7.48. | HMBC spectrum of compound <b>4c</b> in methanol- $d_4$ .....                               | 105 |
| Figure S7.49. | $^1\text{H}$ NMR spectrum of compound <b>5a</b> in $\text{CDCl}_3$ .....                   | 106 |
| Figure S7.50. | $^{13}\text{C}$ NMR spectrum of compound <b>5a</b> in $\text{CDCl}_3$ .....                | 107 |
| Figure S7.51. | HMBC spectrum of compound <b>5a</b> in $\text{CDCl}_3$ .....                               | 108 |
| Figure S7.52. | $^1\text{H}$ NMR spectrum of compound <b>6a</b> in methanol- $d_4$ .....                   | 109 |
| Figure S7.53. | $^{13}\text{C}$ NMR spectrum of compound <b>6a</b> in methanol- $d_4$ .....                | 110 |
| Figure S7.54. | 1D NOESY spectrum of compound <b>6a</b> in methanol- $d_4$ .....                           | 111 |
| Figure S7.55. | $^1\text{H}$ NMR spectrum of compound <b>6b</b> in methanol- $d_4$ .....                   | 112 |
| Figure S7.56. | $^{13}\text{C}$ NMR spectrum of compound <b>6b</b> in methanol- $d_4$ .....                | 113 |
| Figure S7.57. | HSQC spectrum of compound <b>6b</b> in methanol- $d_4$ .....                               | 114 |
| Figure S7.58. | HMBC spectrum of compound <b>6b</b> in methanol- $d_4$ .....                               | 115 |
| Figure S7.59. | $^1\text{H}$ NMR spectrum of compound <b>6c</b> in methanol- $d_4$ .....                   | 116 |
| Figure S7.60. | $^{13}\text{C}$ NMR spectrum of compound <b>6c</b> in methanol- $d_4$ .....                | 117 |
| Figure S7.61. | $^1\text{H}$ NMR spectrum of compound <b>7a</b> in methanol- $d_4$ .....                   | 118 |
| Figure S7.62. | $^{13}\text{C}$ NMR spectrum of compound <b>7a</b> in methanol- $d_4$ .....                | 119 |
| Figure S7.63. | HMBC spectrum of compound <b>7a</b> in methanol- $d_4$ .....                               | 120 |
| Figure S7.64. | $^1\text{H}$ NMR spectrum of compound <b>7b</b> in methanol- $d_4$ .....                   | 121 |
| Figure S7.65. | $^{13}\text{C}$ NMR spectrum of compound <b>7b</b> in methanol- $d_4$ .....                | 122 |
| Figure S7.66. | HSQC spectrum of compound <b>7b</b> in methanol- $d_4$ .....                               | 123 |

|               |                                                                             |     |
|---------------|-----------------------------------------------------------------------------|-----|
| Figure S7.67. | HMBC spectrum of compound <b>7b</b> in methanol- $d_4$ .....                | 124 |
| Figure S7.68. | $^1\text{H}$ NMR spectrum of compound <b>7c</b> in methanol- $d_4$ .....    | 125 |
| Figure S7.69. | $^{13}\text{C}$ NMR spectrum of compound <b>7c</b> in methanol- $d_4$ ..... | 126 |
| Figure S7.70. | HSQC spectrum of compound <b>7c</b> in methanol- $d_4$ .....                | 127 |
| Figure S7.71. | HMBC spectrum of compound <b>7c</b> in methanol- $d_4$ .....                | 128 |
| Figure S7.72. | $^1\text{H}$ NMR spectrum of compound <b>8a</b> in methanol- $d_4$ .....    | 129 |
| Figure S7.73. | $^{13}\text{C}$ NMR spectrum of compound <b>8a</b> in methanol- $d_4$ ..... | 130 |
| Figure S7.74. | HMBC NMR spectrum of compound <b>8a</b> in methanol- $d_4$ .....            | 131 |
| Figure S7.75. | $^1\text{H}$ NMR spectrum of compound <b>8b</b> in methanol- $d_4$ .....    | 132 |
| Figure S7.76. | $^{13}\text{C}$ NMR spectrum of compound <b>8b</b> in methanol- $d_4$ ..... | 133 |
| Figure S7.77. | HMBC spectrum of compound <b>8b</b> in methanol- $d_4$ .....                | 134 |
| Figure S7.78. | $^1\text{H}$ NMR spectrum of compound <b>8c</b> in methanol- $d_4$ .....    | 135 |
| Figure S7.79. | $^{13}\text{C}$ NMR spectrum of compound <b>8c</b> in methanol- $d_4$ ..... | 136 |
| Figure S7.80. | HMBC spectrum of compound <b>8c</b> in methanol- $d_4$ .....                | 137 |
| Figure S8.    | CD spectra of ARA7 and ARA8. ....                                           | 138 |
| 4             | SI References. ....                                                         | 139 |

# 1 SI Materials and Methods

## 1.1 Molecular biology, microbiology and bioinformatics.

### 1.1.1 Construction of *Saccharomyces cerevisiae* expression vectors.

The gene encoding LtOMT was cloned from *Lasioidiplodia theobromae* NBRC 31059 as described (1), and the *hpm5* gene for HsOMT (2) and the gene for the LtOMT variant M1 were commercially synthesized (Joint Genome Institute and BioBasic, respectively). Hybrid OMT genes were constructed by amplifying the appropriate fragments of the parental genes by PCR and fusing these initial PCR products during a second round of PCR. Genes encoding mutant LtOMT variants were constructed by site-directed mutagenesis using synthetic DNA primers. The primers used in this study are listed in Table S6, and mutations engineered into LtOMT are listed in Table S1. OMT genes were inserted between the *NdeI-PmeI* sites of the YEpADH2p expression vector featuring a LEU selectable marker (YEpADH2p-LEU) using the InFusion Kit (BioTool). The YEpADH2p-LEU expression vector that contained the genes for both LtOMT and HsOMT was constructed by ligating the 2,142-bp *BglII-SalI* restriction fragment of YEpADH2p-LEU\_LtOMT into the *BamHI-XhoI*-digested YEpADH2p-LEU vector already containing the gene for HsOMT. Highly reducing PKS (hrPKS) genes for benzenediol lactone (BDL) biosynthesis were cloned into YEpADH2p-TRP1, while BDL nonreducing PKS (nrPKS) genes were cloned into YEpADH2p-URA3 as described in our previous studies (1, 3-8) or were custom synthesized by the Joint Genome Institute based on publicly available sequence data (2). All newly constructed plasmids were verified by DNA sequencing. *Escherichia coli* DH10B and plasmid pJET1.2 (Thermo Fisher) were used for routine DNA manipulations.

### 1.1.2 Total biosynthesis and biotransformation.

*Saccharomyces cerevisiae* BJ5464-NpgA (*MATa ura3-52 his3-Δ200 leu2-Δ1 trp1 pep4::HIS3 prb1 Δ1.6R can1 GAL*)(37) was the host for expression vectors based on YEpADH2p-TRP, YEpADH2p-URA and YEpADH2p-LEU (21-29). For total biosynthesis, expression plasmids for the appropriate hrPKS, nrPKS and OMT were transformed into cells of *Saccharomyces cerevisiae* BJ5464-NpgA (*MATa ura3-52 his3-Δ200 leu2-Δ1 trp1 pep4::HIS3 prb1 Δ1.6R can1 GAL*)(9) using the LiCl-PEG procedure (10), and the cells were plated on SC minimal dropout (-Trp, -Ura, -Leu) agar plates (Clontech). For biotransformation experiments, the expression vector for the appropriate OMT was transformed into the *Saccharomyces cerevisiae* BJ5464-NpgA host (9), and transformants were selected on SC minimal dropout (-Leu) agar plates (Clontech). Three to five independent *S. cerevisiae* transformants were tested for the production of BDL congeners or for the biotransformation of BDL substrates, and fermentations with representative isolates were repeated at least three times with three replicates each (n=9) for product identification and quantitation. Recombinant yeast cells were grown in 100-mL Erlenmeyer flasks containing 25 mL of the appropriate SC minimal dropout medium (Clontech) at 30 °C with shaking at 220 rpm until the OD<sub>600</sub> reached 0.6, corresponding to  $0.33 \pm 0.03$  g of *S. cerevisiae* cells (wet weight). Then, an equal volume of YP medium (1% yeast extract, 2% peptone, 1% glucose) was added to the cultures. Polyketide substrates for biotransformations were dissolved in methanol, and supplemented to the cultures (10 µg/mL, final concentration) at the time of addition of the YP medium. The fermentations were continued at 30 °C with shaking at 220 rpm for an additional 48 hours, with the wet cell weight reaching  $1.28 \pm 0.18$  g. No significant differences in



cell growth were noted for the *S. cerevisiae* strains expressing different variants of the OMT enzymes. Fermentations were scaled up for the isolation of polyketide compounds to two to ten liters, depending on yield.

### **1.1.3 OMT expression in *E. coli* and protein purification.**

The gene encoding LtOMT was cloned from *Lasiodiplodia theobromae* NBRC 31059 as described (21). The *hpm5* gene for HsOMT (29) and the gene for LtOMT variant M1 were commercially synthesized (Joint Genome Institute and BioBasic, respectively). OMT-encoding genes were inserted as *NotI-EcoRI* fragments into the multiple cloning site of the pACYCDuet-1 vector (EMD Millipore) and transformed into *Escherichia coli* Arctic Express (DE3) RIL cells (Agilent Technologies). Transformed *E. coli* strains were cultivated in LB medium supplemented with chloramphenicol (17.0 µg/mL, final concentration) with shaking at 220 rpm at 37 °C until the OD<sub>600</sub> reached 0.6, induced with 0.1 mM isopropyl-β-D-thiogalactopyranoside (IPTG), and the incubation was continued for 24 hours with shaking at 220 rpm at 11 °C. The cells were harvested, washed, and suspended in Binding Buffer (20 mM sodium phosphate buffer (pH7.4), 500 mM NaCl) supplemented with fungal/yeast protease inhibitor cocktail (Biomake). After sonication and centrifugation at 10,000 rpm, the supernatant was loaded onto a His-Bind Ni<sup>2+</sup>-NTA column (Thermo) and washed with 20 bed volumes of Wash Buffer (20 mM sodium phosphate buffer (pH7.4), 500 mM NaCl, 20 mM imidazole (pH7.4)). The His tagged protein was eluted with Elution Buffer (20 mM sodium phosphate buffer (pH7.4), 500 mM NaCl, 250 mM imidazole (pH7.4)). Eluted fractions were analyzed by SDS-polyacrylamide gel electrophoresis (SDS-PAGE). Fractions demonstrating at least 95% purity for the target OMT by SDS-PAGE were concentrated and desalted by VivaSpin Turbo ultrafiltration concentrators (Sartorius, molecular weight

cutoff of 10,000) and the buffer was exchanged to Binding Buffer. Protein concentration was determined using the Bradford dye-binding assay (Thermo). Purified enzymes were stored as aliquots at -80°C after the addition of 10% (vol/vol) glycerol. Enzyme activity assays were performed in 100 µL reaction mixtures containing 50 mM Tris-HCl (pH 8.0), 10 mM MgCl<sub>2</sub>, 0.2% Tween-20, 1 mM DLD **1** as the substrate, and 1 mM *S*-adenosyl methionine (SAM) as the methyl group donor. Reactions were initiated by adding the OMT enzyme (2 µg/100 µL for LtOMT, 20 µg/100 µL for the mutant enzymes), the mixtures were incubated at 30 °C for 1 hour for LtOMT and overnight for the mutants, and the reactions were stopped by extractions with ethyl acetate (three times 400 µL). The solvent was evaporated from the pooled ethyl acetate fractions, and the residue was dissolved in 100 µL methanol for quantitative HPLC analysis. Kinetic parameters ( $V_{\max}$  and  $K_m$ ) were obtained under initial velocity conditions at 30 °C for 5 or 15 minutes (LtOMT or mutants, respectively) for substrate DLD **1** (0.125, 0.25, 0.5, 1, 2 and 4 mM, final concentrations) while the concentration of SAM was held at 1mM. Michaelis-Menten saturation curves were fitted to the equation  $V=V_{\max}[S]/(K_m+[S])$  using KaleidaGraph (Synergy). Measurements were repeated three times with three replicates each (n=9).

#### **1.1.4 Protein structure modeling.**

Homology protein structure models for LtOMT and HsOMT were built with SWISS-MODEL (11) using the MmcR mitomycin 7-*O*-methyltransferase of *Streptomyces lavendulae* (PDB: 3GXO) (12) as the template. Substrates DLD **1**, DHZ **3**, and co-product SAH were modeled in Chem3D using energy minimization to a minimum root mean square (RMS) gradient of 0.010, and molecular dynamics (2.0 fs step interval, 10,000 steps, 1.0 Kcal/atoms/ps heating and cooling rate, 300 K target temperature), followed by docking with the LtOMT or the HsOMT enzymes using Autodock in a two-step approach

(first the co-product, then the methyl acceptor substrate). Protein structures were rendered in Pymol and compared using the DALI server (13). Protein topologies were illustrated with Pro-Origami (<http://munk.csse.unimelb.edu.au/pro-origami/porun.shtml>).

## 1.2 Isolation and characterization of *O*-methylated products.

### 1.2.1 General methods.

Extracts of recombinant yeast cultures were prepared and analyzed by liquid chromatography – mass spectrometry (LC-MS), and the BDL congeners were isolated from large scale fermentations (1-5 L, depending on yield) as previously described (21, 24-28). Quantitative HPLC analysis was conducted on an Agilent 1100 series HPLC instrument equipped with a reversed-phase C18 column (Kromasil 100-5-C18, 5  $\mu$ m, 4.6 mm  $\times$  250 mm). Substrate and product amounts were determined from the area under the peak at 210 nm using a calibration curve for the analyte.

For large scale fermentations, *Saccharomyces cerevisiae* BJ5464-NpgA cultures were adjusted to pH 5.0 and extracted with equal volumes of ethyl acetate three times. The extracts were pooled, dried *in vacuo*, and reconstituted in methanol. Samples were routinely analyzed on an Agilent 1100 series HPLC instrument equipped with a C18 reversed-phase column (Kromasil 100-5-C18, 5  $\mu$ m, 4.6 mm  $\times$  250 mm). For the isolation of *O*-methylated polyketide products, extracts were first subjected to silica gel (25 g) column chromatography and eluted with a gradient of chloroform/methanol to yield five fractions (Fraction A, v/v 100:0, 250 mL; Fraction B, v/v 99:1, 250 mL; Fraction C, v/v 98:2, 250 mL; Fraction D, v/v 95:5, 250 mL; Fraction E, v/v 90:10, 250 mL). Each of these fractions was

analyzed by LC-MS to detect the *O*-methylated products on a Thermo Scientific LXQ ESI-spray mass spectrometer coupled with an Agilent 1100 series HPLC instrument. Fractions containing the target compounds were subsequently purified by preparative HPLC on a Kromasil KR100-7-C18 reversed-phase column (5  $\mu$ m, 10 mm  $\times$  250 mm) using a Waters Delta Prep 4000 system equipped with a PDA 996 detector.  $^1\text{H}$ ,  $^{13}\text{C}$ , and 2D NMR spectra were recorded on a Bruker Avance III 400 spectrometer at 400 MHz for  $^1\text{H}$  NMR and 100 MHz for  $^{13}\text{C}$  NMR. Chemical shift values ( $\delta$ ) are given in parts per million (ppm), and the coupling constants ( $J$  values) are in Hz. Chemical shifts were referenced to the residual solvent peaks of methanol- $d_4$ , chloroform- $d$ , and DMSO- $d_6$ , respectively. HPLC-HRESIMS and MS-MS spectra were acquired on an Agilent 1290 Infinity II HPLC coupled with an Agilent QTOF 6530 instrument using capillary and cone voltages of 3.6 kV and 40-150 V, respectively. The collision energy was optimized from 15 to 50 V. For accurate mass measurements the instrument was calibrated each time using a standard calibration mix (Agilent) in the range of  $m/z$  150-1900. The HPLC was equipped with an Agilent Eclipse Plus C18 RRHD column (50 mm  $\times$  2.1 mm id, 1.8  $\mu$ m particle size), and eluted with a linear gradient of 10-50% of acetonitrile-water over 4 min, 50-95% for 4 min, 95% acetonitrile-water for 2 min and drop down to 10% in 1 min at a flow rate of 0.5 mL/min. Unless otherwise stated, chemicals and solvents were of reagent grade and used as obtained from commercial sources.

### 1.2.2 Lasiodiplodin (1a)

The crude extract (1.2 g) of a 3 L fermentation broth of *S. cerevisiae* BJ5464-NpgA co-expressing LtLasS1-LtLasS2 (1) with LtOMT (1) was separated by silica gel column chromatography to yield fractions A–E. Fraction A was further purified by semi-preparative HPLC eluting with  $\text{CH}_3\text{CN}/\text{H}_2\text{O}$

(85:15, v/v) to yield compound **1a** (15 mg,  $t_R$  = 14.2 min) as a colorless oil.

Compound **1a**:  $^1\text{H}$  NMR (400 MHz, methanol- $d_4$ ) and  $^{13}\text{C}$  NMR (100 MHz, methanol- $d_4$ ) data (Table S2.1) were in agreement with the published data (1) for lasiodiplodin (**1a**) (–)-HRESIMS  $m/z$  291.1608  $[\text{M}-\text{H}]^-$  (calcd. for  $\text{C}_{17}\text{H}_{23}\text{O}_4$ , 291.1602).

### 1.2.3 5-*O*-Methyl-desmethyllasiodiplodin (**1b**)

The crude extract (1.5 g) of a 3 L fermentation broth of *S. cerevisiae* BJ5464-NpgA co-expressing LtLasS1-LtLasS2 (1) with HsOMT (2) was separated by silica gel column chromatography to yield fractions A–E. Fraction A was further purified by semi-preparative HPLC eluting with  $\text{CH}_3\text{CN}/\text{H}_2\text{O}$  (85:15, v/v) to yield compound **1b** (20 mg,  $t_R$  = 17.5 min) as a colorless oil.

Compound **1b**:  $^1\text{H}$  NMR (400 MHz, methanol- $d_4$ ) and  $^{13}\text{C}$  NMR (100 MHz, methanol- $d_4$ ): Table S2.1; (–)-HRESIMS  $m/z$  291.1603  $[\text{M}-\text{H}]^-$  (calcd. for  $\text{C}_{17}\text{H}_{23}\text{O}_4$ , 291.1602).

### 1.2.4 3,5-Di-*O*-methyl-desmethyllasiodiplodin (**1c**)

The crude extract (1.3 g) of a 3 L fermentation broth of *S. cerevisiae* BJ5464-NpgA co-expressing LtLasS1-LtLasS2 (3) with LtOMT and HsOMT was separated by silica gel column chromatography to yield fractions A–E. Fraction A was further purified by semi-preparative HPLC eluting with  $\text{CH}_3\text{CN}/\text{H}_2\text{O}$  (85:15, v/v) to yield compound **1c** (12 mg,  $t_R$  = 15.2 min) as a colorless oil.

Compound **1c**:  $^1\text{H}$  NMR (400 MHz, methanol- $d_4$ ) and  $^{13}\text{C}$  NMR (100 MHz, methanol- $d_4$ ): Table S2.1; (+)-HRESIMS  $m/z$  307.1904  $[\text{M}+\text{H}]^+$  (calcd. for  $\text{C}_{18}\text{H}_{27}\text{O}_4$ , 307.1907).

### 1.2.5 3-*O*-Methylradiplodin (2a)

The crude extract (1.5 g) of a 3 L fermentation broth of *S. cerevisiae* BJ5464-NpgA co-expressing CcRadS1-LtLasS2(SAT<sub>CcRadS2</sub>) (5) with LtOMT was separated by silica gel column chromatography to yield fractions A–E. Fraction B was further purified by semi-preparative HPLC eluting with CH<sub>3</sub>CN/H<sub>2</sub>O (80:20, v/v) to yield compound **2a** (13 mg,  $t_R$  = 14.7 min) as a colorless oil.

Compound **2a**: <sup>1</sup>H NMR (400 MHz, CDCl<sub>3</sub>) and <sup>13</sup>C NMR (100 MHz, CDCl<sub>3</sub>): Table S2.2; (–)-HRESIMS  $m/z$  287.1293 [M–H]<sup>–</sup> (calcd. for C<sub>17</sub>H<sub>19</sub>O<sub>4</sub>, 287.1289).

### 1.2.6 5-*O*-Methylradiplodin (2b)

The crude extract (1.2 g) of a 3 L fermentation broth of *S. cerevisiae* BJ5464-NpgA co-expressing CcRadS1-LtLasS2(SAT<sub>CcRadS2</sub>) (5) with LtOMT mutant M6 was separated by silica gel column chromatography to yield fractions A–E. Fraction B was further purified by semi-preparative HPLC eluting with CH<sub>3</sub>CN/H<sub>2</sub>O (80:20, v/v) to yield compound **2b** (13 mg,  $t_R$  = 16.2 min) as a colorless oil.

Compound **2b**: <sup>1</sup>H NMR (400 MHz, CDCl<sub>3</sub>) and <sup>13</sup>C NMR (100 MHz, CDCl<sub>3</sub>): Table S2.2; (–)-HRESIMS  $m/z$  287.1291 [M–H]<sup>–</sup> (calcd. for C<sub>17</sub>H<sub>19</sub>O<sub>4</sub>, 287.1289).

### 1.2.7 3,5-Di-*O*-methylradiplodin (2c)

The crude extract (1.0 g) of a 3 L fermentation broth of *S. cerevisiae* BJ5464-NpgA co-expressing CcRadS1-LtLasS2(SAT<sub>CcRadS2</sub>) (5) with LtOMT and HsOMT was separated by silica gel column chromatography to yield fractions A–E. Fraction A was further purified by semi-preparative HPLC eluting with CH<sub>3</sub>CN/H<sub>2</sub>O (80:20, v/v) to yield compound **2c** (9.8 mg,  $t_R$  = 15.3 min) as a colorless oil.

Compound **2c**: <sup>1</sup>H NMR (400 MHz, CDCl<sub>3</sub>) and <sup>13</sup>C NMR (100 MHz, CDCl<sub>3</sub>): Table S2.2; (+)-

HRESIMS  $m/z$  303.1587  $[M+H]^+$  (calcd. for  $C_{18}H_{23}O_4$ , 303.1596).

### 1.2.8 14,15-Dehydro-3-*O*-methylzearalenol (3a)

The crude extract (1.3 g) of a 3 L fermentation broth of *S. cerevisiae* BJ5464-NpgA co-expressing the *hpm8-hpm3* genes for HsHypS1-HsHypS2 (2) with LtOMT was separated by silica gel column chromatography to yield fractions A–E. Fraction C was further purified by semi-preparative HPLC eluting with  $CH_3CN/H_2O$  (70:30, v/v) to yield compound **3a** (13.2 mg,  $t_R$  = 16.0 min) as a white solid.

Compound **3a**:  $^1H$  NMR (400 MHz,  $DMSO-d_6$ ) and  $^{13}C$  NMR (100 MHz,  $DMSO-d_6$ ): Table S2.3; (–)-HRESIMS  $m/z$  331.1554  $[M-H]^-$  (calcd. for  $C_{19}H_{23}O_5$ , 331.1551).

### 1.2.9 14,15-Dehydro-5-*O*-methylzearalenol (3b)

The crude extract (1.1 g) of a 3 L fermentation broth of *S. cerevisiae* BJ5464-NpgA co-expressing the *hpm8-hpm3* genes for HsHypS1-HsHypS2 (2) with HsOMT was separated by silica gel column chromatography to yield fractions A–E. Fraction C was further purified by semi-preparative HPLC eluting with  $CH_3CN/H_2O$  (70:30, v/v) to yield compound **3b** (12.1 mg,  $t_R$  = 18.2 min) as a white solid.

Compound **3b**:  $^1H$  NMR (400 MHz,  $DMSO-d_6$ ) and  $^{13}C$  NMR (100 MHz,  $DMSO-d_6$ ): Table S2.3; (+)-HRESIMS  $m/z$  315.1576  $[M-H_2O+H]^+$  (calcd. for  $C_{19}H_{23}O_4$ , 315.1596).

### 1.2.10 14,15-Dehydro-3,5-di-*O*-methylzearalenol (3c)

The crude extract (1.2 g) of a 4 L fermentation broth of *S. cerevisiae* BJ5464-NpgA co-expressing the *hpm8-hpm3* genes for HsHypS1-HsHypS2 (2) with LtOMT and HsOMT was separated by silica gel column chromatography to yield fractions A–E. Fraction B was further purified by semi-preparative HPLC eluting with  $CH_3CN/H_2O$  (70:30, v/v) to yield compound **3c** (10.2 mg,  $t_R$  = 17.5 min)

as a white solid.

Compound **3c**:  $^1\text{H}$  NMR (400 MHz, DMSO- $d_6$ ) and  $^{13}\text{C}$  NMR (100 MHz, DMSO- $d_6$ ): Table S2.3; (+)-HRESIMS  $m/z$  329.1782  $[\text{M}-\text{H}_2\text{O}+\text{H}]^+$  (calcd. for  $\text{C}_{20}\text{H}_{25}\text{O}_4$ , 329.1752).

#### 1.2.11 3-O-Methylzearalenol (4a)

The crude extract (1.2 g) of a 3 L fermentation broth of *S. cerevisiae* BJ5464-NpgA co-expressing GzZeaS1-GzZeaS2 (14, 15) with LtOMT was separated by silica gel column chromatography to yield fractions A–E. Fraction C was further purified by semi-preparative HPLC eluting with  $\text{CH}_3\text{CN}/\text{H}_2\text{O}$  (70:30, v/v) to yield compound **4a** (5.3 mg,  $t_{\text{R}}$  = 15.6 min) as a white solid.

Compound **4a**:  $^1\text{H}$  NMR (400 MHz, methanol- $d_4$ ) and  $^{13}\text{C}$  NMR (100 MHz, methanol- $d_4$ ): Table S2.4; (–)-HRESIMS  $m/z$  333.1713  $[\text{M}-\text{H}]^-$  (calcd. for  $\text{C}_{19}\text{H}_{25}\text{O}_5$ , 333.1707).

#### 1.2.12 5-O-Methylzearalenol (4b)

The crude extract (1.4 g) of a 3 L fermentation broth of *S. cerevisiae* BJ5464-NpgA co-expressing GzZeaS1-GzZeaS2 (14, 15) with HsOMT was separated by silica gel column chromatography to yield fractions A–E. Fraction C was further purified by semi-preparative HPLC eluting with  $\text{CH}_3\text{CN}/\text{H}_2\text{O}$  (70:30, v/v) to yield compound **4b** (6.5 mg,  $t_{\text{R}}$  = 17.2 min) as a white solid.

Compound **4b**:  $^1\text{H}$  NMR (400 MHz, methanol- $d_4$ ) and  $^{13}\text{C}$  NMR (100 MHz, methanol- $d_4$ ): Table S2.4; (–)-HRESIMS  $m/z$  333.1705  $[\text{M}-\text{H}]^-$  (calcd. for  $\text{C}_{19}\text{H}_{25}\text{O}_5$ , 333.1707).

#### 1.2.13 3,5-Di-O-methylzearalenol (4c)

Compound **4b** (4 mg) was fed to a 1 L fermentation of *S. cerevisiae* BJ5464-NpgA expressing



LtOMT. The crude extract (0.5 g) was separated by silica gel column chromatography to yield fractions A–E. Fraction D was further purified by semi-preparative HPLC eluting with CH<sub>3</sub>CN/H<sub>2</sub>O (75:25, v/v) to yield compound **4c** (3.0 mg,  $t_R$  = 16.2 min) as a colorless oil.

Compound **4c**: <sup>1</sup>H NMR (400 MHz, methanol-*d*<sub>4</sub>) and <sup>13</sup>C NMR (100 MHz, methanol-*d*<sub>4</sub>): Table S2.4; (+)-HRESIMS  $m/z$  331.1910 [M–H<sub>2</sub>O+H]<sup>+</sup> (calcd. for C<sub>20</sub>H<sub>27</sub>O<sub>4</sub>, 331.1909).

#### 1.2.14 3-*O*-Methyllasicicol (**5a**)

The crude extract (1.3 g) of a 3 L fermentation broth of *S. cerevisiae* BJ5464-NpgA co-expressing LtLasS1-CcRadS2 (5) with LtOMT was separated by silica gel column chromatography to yield fractions A–E. Fraction B was further purified by semi-preparative HPLC eluting with CH<sub>3</sub>CN/H<sub>2</sub>O (75:25, v/v) to yield compound **5a** (8.2 mg,  $t_R$  = 18.3 min) as a white solid.

Compound **5a**: <sup>1</sup>H NMR (400 MHz, CDCl<sub>3</sub>) and <sup>13</sup>C NMR (100 MHz, CDCl<sub>3</sub>): Table S2.4; (–)-HRESIMS  $m/z$  333.1708 [M–H]<sup>–</sup> (calcd. for C<sub>19</sub>H<sub>25</sub>O<sub>5</sub>, 333.1707).

#### 1.2.15 7-*O*-methyllasilarin (**6a**)

The crude extract (1.7 g) of a 3 L fermentation broth of *S. cerevisiae* BJ5464-NpgA co-expressing LtLasS1-AtCurS2 (5) with LtOMT was separated by silica gel column chromatography to yield fractions A–E. Fraction B was further purified by semi-preparative HPLC eluting with CH<sub>3</sub>CN/H<sub>2</sub>O (75:35, v/v) to yield compound **6a** (13.2 mg,  $t_R$  = 15.5 min) as a white solid.

Compound **6a**: <sup>1</sup>H NMR (400 MHz, methanol-*d*<sub>4</sub>) and <sup>13</sup>C NMR (100 MHz, methanol-*d*<sub>4</sub>): Table S2.5; (–)-HRESIMS  $m/z$  333.1701 [M–H]<sup>–</sup> (calcd. for C<sub>19</sub>H<sub>25</sub>O<sub>5</sub>, 333.1707).

### 1.2.16 5-*O*-methyllasilarin (**6b**)

The crude extract (1.6 g) of a 3 L fermentation broth of *S. cerevisiae* BJ5464-NpgA co-expressing LtLasS1-AtCurS2 (5) with HsOMT was separated by silica gel column chromatography to yield fractions A–E. Fraction B was further purified by semi-preparative HPLC eluting with CH<sub>3</sub>CN/H<sub>2</sub>O (75:35, v/v) to yield compound **6b** (12.2 mg,  $t_R$  = 17.5 min) as a white solid.

Compound **6b**: <sup>1</sup>H NMR (400 MHz, methanol-*d*<sub>4</sub>) and <sup>13</sup>C NMR (100 MHz, methanol-*d*<sub>4</sub>): Table S2.5; (–)-HRESIMS  $m/z$  333.1701 [M–H]<sup>–</sup> (calcd. for C<sub>19</sub>H<sub>25</sub>O<sub>5</sub>, 333.1707).

### 1.2.17 5,7-Di-*O*-methyllasilarin (**6c**)

The crude extract (1.4 g) of a 3 L fermentation broth of *S. cerevisiae* BJ5464-NpgA co-expressing LtLasS1-AtCurS2 (5) with LtOMT and HsOMT was separated by silica gel column chromatography to yield fractions A–E. Fraction B was further purified by semi-preparative HPLC eluting with CH<sub>3</sub>CN/H<sub>2</sub>O (75:35, v/v) to yield compound **6c** (3.2 mg,  $t_R$  = 16.3 min) as a white solid.

Compound **6c**: <sup>1</sup>H NMR (400 MHz, methanol-*d*<sub>4</sub>) and <sup>13</sup>C NMR (100 MHz, methanol-*d*<sub>4</sub>): Table S2.5; (–)-HRESIMS  $m/z$  347.1874 [M–H]<sup>–</sup> (calcd. for C<sub>20</sub>H<sub>27</sub>O<sub>5</sub>, 347.1864).

### 1.2.18 7-[(*R,E*)-6-Hydroxyhept-1-en-1-yl]-3-*O*-methylresorcylic acid ethyl ester (**7a**)

The crude extract (1.5 g) of a 3 L fermentation broth of *S. cerevisiae* BJ5464-NpgA co-expressing AzResS1-LtLasS2(SAT<sub>AzResS2</sub>) (5) with LtOMT was separated by silica gel column chromatography to yield fractions A–E. Fraction C was further purified by semi-preparative HPLC eluting with CH<sub>3</sub>CN/H<sub>2</sub>O (70:30, v/v) to yield compound **7a** (15.3 mg,  $t_R$  = 13.4 min) as a white solid.

Compound **7a**: <sup>1</sup>H NMR (400 MHz, methanol-*d*<sub>4</sub>) and <sup>13</sup>C NMR (100 MHz, methanol-*d*<sub>4</sub>): Table

S2.6; (-)-HRESIMS  $m/z$  307.1561  $[M-H]^-$  (calcd. for  $C_{17}H_{23}O_5$ , 307.1551).

#### 1.2.19 7-[(*R,E*)-6-Hydroxyhept-1-en-1-yl]-5-*O*-methylresorcylic acid ethyl ester (**7b**)

The crude extract (1.2 g) of a 3 L fermentation broth of *S. cerevisiae* BJ5464-NpgA co-expressing AzResS1-LtLasS2(SAT<sub>AzResS2</sub>) (5) with HsOMT was separated by silica gel column chromatography to yield fractions A–E. Fraction C was further purified by semi-preparative HPLC eluting with  $CH_3CN/H_2O$  (70:30, v/v) to yield compound **7b** (11.2 mg,  $t_R$  = 15.4 min) as a white solid.

Compound **7b**:  $^1H$  NMR (400 MHz, methanol- $d_4$ ) and  $^{13}C$  NMR (100 MHz, methanol- $d_4$ ): Table S2.6; (-)-HRESIMS  $m/z$  307.1543  $[M-H]^-$  (calcd. for  $C_{17}H_{23}O_5$ , 307.1551).

#### 1.2.20 7-[(*R,E*)-6-Hydroxyhept-1-en-1-yl]-3,5-di-*O*-methylresorcylic acid ethyl ester (**7c**)

The crude extract (1.5 g) of a 3 L fermentation broth of *S. cerevisiae* BJ5464-NpgA co-expressing AzResS1-LtLasS2(SAT<sub>AzResS2</sub>) (5) with LtOMT and HsOMT was separated by silica gel column chromatography to yield fractions A–E. Fraction C was further purified by semi-preparative HPLC eluting with  $CH_3CN/H_2O$  (70:30, v/v) to yield compound **7c** (8.9 mg,  $t_R$  = 14.4 min) as a white solid.

Compound **7c**:  $^1H$  NMR (400 MHz, methanol- $d_4$ ) and  $^{13}C$  NMR (100 MHz, methanol- $d_4$ ): Table S2.6; (-)-HRESIMS  $m/z$  321.1701  $[M-H]^-$  (calcd. for  $C_{18}H_{25}O_5$ , 321.1707).

#### 1.2.21 7-[(*S,E*)-6-Hydroxyhept-1-en-1-yl]-resorcylic acid ethyl ester (**8**)

The crude extract (1.2 g) of a 3 L fermentation broth of *S. cerevisiae* BJ5464-NpgA co-expressing AtCurS1-LtLasS2(SAT<sub>AtCurS2</sub>) was separated by silica gel column chromatography to yield fractions A–E. Fraction C was further purified by semi-preparative HPLC eluting with  $CH_3CN/H_2O$  (70:30,

v/v) to yield compound **8** (10.2 mg,  $t_R$  = 14.0 min) as a colorless oil.

Compound **8**:  $^1\text{H}$  NMR (400 MHz, methanol- $d_4$ ):  $\delta_{\text{H}}$  6.92 (1H, d,  $J$  = 15.5 Hz, H-8), 6.37 (1H, d,  $J$  = 2.4 Hz, H-6), 6.21 (1H, d,  $J$  = 2.4 Hz, H-4), 5.90 (1H, dt,  $J$  = 15.5, 6.8 Hz, H-9), 4.36 (2H, q,  $J$  = 7.1 Hz, H-15), 3.75 (1H, m, H-13), 2.22 (2H, m, H-10), 1.61 (2H, m, H-12), 1.44 (2H, m, H-11), 1.39 (3H, t,  $J$  = 7.1 Hz, H-16), 1.17 (3H, d,  $J$  = 6.2 Hz, H-14);  $^{13}\text{C}$  NMR (100 MHz, methanol- $d_4$ ): 172.7 (C-1), 165.4 (C-3), 163.8 (C-5), 145.1 (C-7), 133.4 (C-9), 132.6 (C-8), 109.2 (C-6), 105.2 (C-2), 102.8 (C-4), 68.7 (C-13), 62.4 (C-15), 39.9 (C-12), 34.2 (C-10), 26.7 (C-11), 23.7 (C-14), 14.8 (C-16); (–)-HRESIMS  $m/z$  293.1400  $[\text{M}-\text{H}]^-$  (calcd. for  $\text{C}_{16}\text{H}_{21}\text{O}_5$ , 293.1389).

#### 1.2.22 7-[(*S,E*)-6-Hydroxyhept-1-en-1-yl]-3-*O*-methylresorcylic acid ethyl ester (**8a**)

The crude extract (1.3 g) of a 3 L fermentation broth of *S. cerevisiae* BJ5464-NpgA co-expressing AtCurS1-LtLasS2(SAT<sub>AtCurS2</sub>) (5) with LtOMT was separated by silica gel column chromatography to yield fractions A–E. Fraction C was further purified by semi-preparative HPLC eluting with  $\text{CH}_3\text{CN}/\text{H}_2\text{O}$  (70:30, v/v) to yield compound **8a** (3.2 mg,  $t_R$  = 13.5 min) as a white solid.

Compound **8a**:  $^1\text{H}$  NMR (400 MHz, methanol- $d_4$ ) and  $^{13}\text{C}$  NMR (100 MHz, methanol- $d_4$ ): Table S2.7; (–)-HRESIMS  $m/z$  307.1549  $[\text{M}-\text{H}]^-$  (calcd. for  $\text{C}_{17}\text{H}_{23}\text{O}_5$ , 307.1551).

#### 1.2.23 7-[(*S,E*)-6-Hydroxyhept-1-en-1-yl]-5-*O*-methylresorcylic acid ethyl ester (**8b**)

The crude extract (1.4 g) of a 3 L fermentation broth of *S. cerevisiae* BJ5464-NpgA co-expressing AtCurS1-LtLasS2(SAT<sub>AtCurS2</sub>) (5) with HsOMT was separated by silica gel column chromatography to yield fractions A–E. Fraction C was further purified by semi-preparative HPLC eluting with  $\text{CH}_3\text{CN}/\text{H}_2\text{O}$  (70:30, v/v) to yield compound **8b** (1.8 mg,  $t_R$  = 15.3 min) as a white solid.

Compound **8b**:  $^1\text{H}$  NMR (400 MHz, methanol- $d_4$ ) and  $^{13}\text{C}$  NMR (100 MHz, methanol- $d_4$ ): Table S2.7; (–)-HRESIMS  $m/z$  307.1544  $[\text{M}-\text{H}]^-$  (calcd. for  $\text{C}_{17}\text{H}_{23}\text{O}_5$ , 307.1551).

#### 1.2.24 7-[(*S,E*)-6-Hydroxyhept-1-en-1-yl]-3,5-di-*O*-methylresorcylic acid ethyl ester (**8c**)

The crude extract (1.4 g) of a 3 L fermentation broth of *S. cerevisiae* BJ5464-NpgA co-expressing AtCurS1-LtLasS2(SAT<sub>AtCurS2</sub>) (5) with LtOMT and HsOMT was separated by silica gel column chromatography to yield fractions A–E. Fraction C was further purified by semi-preparative HPLC eluting with  $\text{CH}_3\text{CN}/\text{H}_2\text{O}$  (70:30, v/v) to yield compound **8c** (3.2 mg,  $t_R$  = 14.3 min) as a colorless oil.

Compound **8c**:  $^1\text{H}$  NMR (400 MHz, methanol- $d_4$ ) and  $^{13}\text{C}$  NMR (100 MHz, methanol- $d_4$ ): Table S2.7; (–)-HRESIMS  $m/z$  321.1699  $[\text{M}-\text{H}]^-$  (calcd. for  $\text{C}_{18}\text{H}_{25}\text{O}_5$ , 321.1707).

### 1.3 Structure elucidation.

The HRESIMS-determined molecular formula of compound **1b**,  $\text{C}_{17}\text{H}_{24}\text{O}_4$ , was identical to that of **1a**. The  $^1\text{H}$  and  $^{13}\text{C}$  NMR spectra of **1b** displayed resonances corresponding to a desmethyl-lasiiodiplodin core and an *O*-methyl functionality, and were highly similar to those of **1a**. However, discrepancies in the  $^1\text{H}$  and  $^{13}\text{C}$  chemical shifts were observed (Table S2.1), indicating that these two compounds were regioisomers which only differed in the position of the *O*-methylation. Next, HSQC, HMBC and 1D NOESY experiments were carried out to identify the position to which the *O*-methyl functionality was attached in **1b**. The HMBC correlations of the aromatic protons ( $\delta_{\text{H}}$  6.29, d,  $J$  = 2.8 Hz;  $\delta_{\text{H}}$  6.31, d,  $J$  = 2.8 Hz) and the *O*-methyl protons ( $\delta_{\text{H}}$  3.78, s) with the aromatic carbon at  $\delta_{\text{C}}$  165.1

suggested that the *O*-methyl functionality was attached to C-5 (Figure S6). This was further supported by the fact that both aromatic protons had NOE correlations with the *O*-methyl protons (Figure S6). Based on the above-described evidence, the structure of **1b** was established as 5-*O*-methyl-desmethyllasiodiplodin.

The HRESIMS-determined molecular weight of **1c** was 14 amu higher than that of **1a** and **1b**. The <sup>1</sup>H and <sup>13</sup>C NMR spectra of **1c** were similar to those of **1a** and **1b** (Table S2.1), except for the presence of resonances corresponding to two *O*-methyl functionalities ( $\delta_{\text{H}}$  3.80, s,  $\delta_{\text{C}}$  55.8;  $\delta_{\text{H}}$  3.79, s,  $\delta_{\text{C}}$  56.4) instead of one. Extensive analysis of the HMBC spectrum confirmed that **1c** was the 3,5-di-*O*-methylated derivative of desmethyllasiodiplodin **1** (Figure S6).

The HRESIMS-determined molecular weight of compounds **2a** and **2b** were 14 amu higher than that of radiplodin. The <sup>1</sup>H and <sup>13</sup>C NMR spectra of **2a** and **2b** were quite similar, and both showed resonances corresponding to an extra *O*-methyl substituent (**2a**:  $\delta_{\text{H}}$  3.69, s;  $\delta_{\text{C}}$  56.0; **2b**:  $\delta_{\text{H}}$  3.79, s;  $\delta_{\text{C}}$  55.4) when compared to those of radiplodin (Table S2.2). The determination of *O*-methylation positions and the assignments of <sup>1</sup>H and <sup>13</sup>C NMR data were achieved by analyzing the 2D NMR spectra. In the HMBC spectra, the *O*-methyl protons of **2a** showed correlations with C-3 ( $\delta_{\text{C}}$  158.0), while the *O*-methyl protons of **2b** had correlations with C-5 ( $\delta_{\text{C}}$  163.8), which suggested **2a** and **2b** as the 3-*O*-methylated and 5-*O*-methylated products of radiplodin, respectively (Figure S6).

Based on the HRESIMS-determined molecular weight and the 1D NMR spectra (Table S2.2), **2c** was elucidated as the 3,5-di-*O*-methylated product of radiplodin, and this hypothesis was verified by HSQC and HMBC experiments (Figure S6).

The molecular formula of compounds **3a** and **3b** were determined as C<sub>19</sub>H<sub>24</sub>O<sub>5</sub> by the HRESIMS. The initial interpretation of the <sup>1</sup>H and <sup>13</sup>C NMR data (Table S2.3) established their structures as mono-*O*-methyl substituted 14,15-dehydrozearalenol. Next, HSQC and HMBC experiments were carried out to determine the *O*-methylation position. In the HMBC spectrum of **3a**, the aromatic proton at  $\delta_{\text{H}}$  6.31 (d,  $J$  = 2.0 Hz, H-4) and the *O*-methyl protons ( $\delta_{\text{H}}$  3.68, s) had a cross peak with the aromatic carbon at  $\delta_{\text{C}}$  157.2 (C-3), indicating that **3a** was the 3-*O*-methylated product of 14,15-dehydrozearalenol (Figure S6). By contrast, both aromatic protons ( $\delta_{\text{H}}$  6.30, d,  $J$  = 2.4 Hz, H-4;  $\delta_{\text{H}}$  6.56, d,  $J$  = 2.4 Hz, H-6) and the *O*-methyl protons ( $\delta_{\text{H}}$  3.73, s) of **3b** had HMBC correlations with the aromatic carbon at  $\delta_{\text{C}}$  160.9 (C-5), defining the structure of **3b** as 14,15-dehydro-3-*O*-methylzearalenol (Figure S6).

The HRESIMS-determined molecular weight of compound **3c** was 14 amu higher than those of **3a** and **3b**, indicating the presence of an extra methyl functional group. After the comprehensive analysis of 1D and 2D NMR data (Table S2.3 and Figure S6), the structure of **3c** was elucidated as 14,15-dehydro-3,5-di-*O*-methylzearalenol.

The HRESIMS-determined molecular formula, C<sub>19</sub>H<sub>26</sub>O<sub>5</sub>, as well as the <sup>1</sup>H and <sup>13</sup>C NMR data of compounds **4a** and **4b** (Table S2.4) indicated that they were both mono-*O*-methylated products of zearalenol. The 1D NOESY spectrum of **4a** showed that the *O*-methyl protons ( $\delta_{\text{H}}$  3.76, s) correlated with only one aromatic proton ( $\delta_{\text{H}}$  6.55, d,  $J$  = 2.0 Hz). On the other hand, the *O*-methyl protons of **4b** ( $\delta_{\text{H}}$  3.80, s) had NOE correlations with not only one, but both aromatic protons ( $\delta_{\text{H}}$  6.56, d,  $J$  = 2.0 Hz;  $\delta_{\text{H}}$  6.34, d,  $J$  = 2.0 Hz) (Figure S6). These evidences strongly indicated that **4a** and **4b** were 3-*O*-methylzearalenol and 5-*O*-methylzearalenol, respectively.

The HRESIMS-determined molecular weight of compound **4c** was 14 amu higher than those of **4a**

and **4b**, indicating the presence of an additional methyl group. The  $^1\text{H}$  and  $^{13}\text{C}$  NMR data (Table S2.4) further supported **4c** as the di-*O*-methylated product of zearalenol. Based on the HMBC correlations of one set of methoxy protons ( $\delta_{\text{H}}$  3.83, s) with the aromatic carbon at  $\delta_{\text{C}}$  162.9, and the other set of methoxy protons ( $\delta_{\text{H}}$  3.79, s) with the aromatic carbon at  $\delta_{\text{C}}$  159.0 (Figure S6), the structure of **4c** was confirmed as 3,5-di-*O*-methylzearalenol.

The HRESIMS-determined molecular formula and the 1D NMR data (Table S2.4) of compound **5a** suggested that it was an *O*-methylated product of lasicol. The HMBC correlations of one aromatic proton ( $\delta_{\text{H}}$  6.21, d,  $J = 2.0$  Hz) and the *O*-methyl protons ( $\delta_{\text{H}}$  3.71, s) with the aromatic carbon at  $\delta_{\text{C}}$  159.1 confirmed that the OH at C-3 of lasicol was *O*-methylated in **5a** (Figure S6).

The HRESIMS-determined molecular weight of compounds **6a** and **6b** were both 14 amu higher than that of lasilarin. Their  $^1\text{H}$  and  $^{13}\text{C}$  NMR spectra were very similar, both showing resonances corresponding to a lasilarin core and an *O*-methyl functionality, but not superimposable with each other (Table S2.5). These evidences suggested that **6a** and **6b** were regioisomeric mono-*O*-methylated products of lasilarin. The 1D NOESY spectrum of **6a** showed that the *O*-methyl protons ( $\delta_{\text{H}}$  3.80, s) correlated with only one aromatic proton ( $\delta_{\text{H}}$  6.41, d,  $J = 2.2$  Hz), indicating the *O*-methyl group was attached to C-7 in **6a** (Figure S6). By contrast, HMBC correlations of both aromatic protons ( $\delta_{\text{H}}$  6.34, d,  $J = 2.2$  Hz;  $\delta_{\text{H}}$  6.36, d,  $J = 2.2$  Hz) and the *O*-methyl protons ( $\delta_{\text{H}}$  3.77, s) with the aromatic carbon at  $\delta_{\text{C}}$  163.0 suggested that the *O*-methyl group in **6b** was attached to C-5 (Figure S6). Based on the above-described evidence, the structures of **6a** and **6b** were elucidated as 7-*O*-methyllasilarin and 5-*O*-methyllasilarin, respectively.

The HRESIMS-determined molecular formula,  $\text{C}_{20}\text{H}_{28}\text{O}_5$ , and the 1D NMR data of **6c** were



consistent with those of a di-*O*-methylated product of lasilarin (Table S2.5). Since lasilarin had only two positions suitable for *O*-methylation, the structure of **6c** was elucidated as 5,7-di-*O*-methyllasilarin.

The molecular formula of compounds **7a** and **7b** were established as C<sub>17</sub>H<sub>25</sub>O<sub>5</sub> by HRESIMS. The <sup>1</sup>H and <sup>13</sup>C NMR data of **7a** and **7b** (Table S2.6) suggested that they were regioisomeric mono-*O*-methylated products of ARA7 (**7**). In the HMBC spectrum of **7a**, the *O*-methyl protons ( $\delta_{\text{H}}$  3.76, s) and one aromatic proton ( $\delta_{\text{H}}$  6.35, d,  $J = 2.0$  Hz) had correlations with the aromatic carbon at  $\delta_{\text{C}}$  159.6 (C-3). However, in the case of **7b** the *O*-methyl protons ( $\delta_{\text{H}}$  3.81, s) and both aromatic protons ( $\delta_{\text{H}}$  6.36, d,  $J = 2.4$  Hz;  $\delta_{\text{H}}$  6.47, d,  $J = 2.4$  Hz) correlated with the aromatic carbon at  $\delta_{\text{C}}$  164.9 (C-5) (Figure S6). Based on these, the structures of **7a** and **7b** were established as 7-[(*R,E*)-6-Hydroxyhept-1-en-1-yl]-3-*O*-methylresorcylic acid ethyl ester and 7-[(*R,E*)-6-Hydroxyhept-1-en-1-yl]-5-*O*-methylresorcylic acid ethyl ester, respectively.

The HRESIMS-determined molecular weight of **7c** was 14 amu higher than those of **7a** and **7b**, suggesting that **7c** was the di-*O*-methylated derivative of **7**. After careful examination of the 1D and 2D NMR data (Table S2.6 and Figure S6), the structure of **7c** was elucidated as 7-[(*R,E*)-6-Hydroxyhept-1-en-1-yl]-3,5-di-*O*-methylresorcylic acid ethyl ester.

The <sup>1</sup>H and <sup>13</sup>C NMR data of ARA8 (**8**) (see section 1.2.21) were identical to those of ARA7 (**7**) (**5**), while the circular dichroism (CD) spectra (Figure S8) indicated that **8** was the enantiomer of **7** whereby C-13 of **8** displays an *S*-configuration. The HRESIMS-determined molecular weight and the 1D NMR spectra of **8a** and **8b** (Table S2.7) were identical to those of **7a** and **7b**, respectively, suggesting that **8a** is the 3-*O*-methylated derivative of **8**, while **8b** is the 5-*O*-methylated product. Further examination of the HMBC correlations supported this hypothesis (Figure S6). Thus, the structures of

**8a** and **8b** were elucidated as 7-[(*S,E*)-6-Hydroxyhept-1-en-1-yl]-3-*O*-methylresorcylic acid ethyl ester and 7-[(*S,E*)-6-Hydroxyhept-1-en-1-yl]-5-*O*-methylresorcylic acid ethyl ester, respectively.

Similarly, the HRESIMS determined molecular weight and the 1D NMR spectra of **8c** (Table S2.7) were identical to those of **7c**. Interpretation of the HMBC spectrum confirmed that **8c** was 7-[(*S,E*)-6-Hydroxyhept-1-en-1-yl]-3,5-di-*O*-methylresorcylic acid ethyl ester (Figure S6).

## 2 SI Tables

**Table S1. Mutations engineered into LtOMT.**

| LtOMT |            |       | Mutations  |       |
|-------|------------|-------|------------|-------|
| Sites | Amino acid | Codon | Amino acid | Codon |
| 330   | F          | TTC   | V          | GTC   |
| 356   | T          | ACT   | M          | ATG   |
| 384   | Q          | CAA   | K          | AAG   |
| 386   | G          | GGT   | R          | AGA   |
| 387   | W          | TGG   | H          | CAT   |
| 388   | Q          | CAA   | H          | CAT   |

**Table S2.  $^1\text{H}$  NMR (400 MHz) and  $^{13}\text{C}$  NMR (100 MHz) data.****Table S2.1. Compounds 1a, 1b and 1c (in methanol- $d_4$ ).**

| no.                | 1a                         |                                          | 1b                         |                                          | 1c                         |                                          |
|--------------------|----------------------------|------------------------------------------|----------------------------|------------------------------------------|----------------------------|------------------------------------------|
|                    | $\delta_{\text{C}}$ , type | $\delta_{\text{H}}$ , mult. ( $J$ in Hz) | $\delta_{\text{C}}$ , type | $\delta_{\text{H}}$ , mult. ( $J$ in Hz) | $\delta_{\text{C}}$ , type | $\delta_{\text{H}}$ , mult. ( $J$ in Hz) |
| 1                  | 170.9, C                   |                                          | 172.9, C                   |                                          | 170.6, C                   |                                          |
| 2                  | 109.2, C                   |                                          | 107.3, C                   |                                          | 118.9, C                   |                                          |
| 3                  | 159.4, C                   |                                          | 165.6, C                   |                                          | 159.3, C                   |                                          |
| 4                  | 97.9, CH                   | 6.25, d (2.8)                            | 99.9, CH                   | 6.29, d (2.8)                            | 97.2, CH                   | 6.41, d (2.0)                            |
| 5                  | 160.8, C                   |                                          | 165.1, C                   |                                          | 163.0, C                   |                                          |
| 6                  | 117.6, CH                  | 6.29, d (2.8)                            | 110.9, CH                  | 6.31, d (2.8)                            | 107.1, CH                  | 6.39, d (2.0)                            |
| 7                  | 143.8, C                   |                                          | 149.2, C                   |                                          | 143.8, C                   |                                          |
| 8                  | 31.3, CH <sub>2</sub>      | 2.64, m                                  | 32.2, CH <sub>2</sub>      | 3.25, m                                  | 31.4, CH <sub>2</sub>      | 2.69, dt (15.6, 8.0)                     |
|                    |                            | 2.48, m                                  |                            | 2.53, m                                  |                            | 2.55, dt (15.6, 8.0)                     |
| 9                  | 31.1, CH <sub>2</sub>      | 1.37–1.71, m                             | 32.0, CH <sub>2</sub>      | 1.40–1.73, m                             | 31.3, CH <sub>2</sub>      | 1.20–1.72, m                             |
| 10                 | 25.6, CH <sub>2</sub>      | 1.37–1.71, m                             | 25.5, CH <sub>2</sub>      | 1.40–1.73, m                             | 25.6, CH <sub>2</sub>      | 1.20–1.72, m                             |
| 11                 | 27.7, CH <sub>2</sub>      | 1.37–1.71, m                             | 28.1, CH <sub>2</sub>      | 1.40–1.73, m                             | 27.7, CH <sub>2</sub>      | 1.20–1.72, m                             |
| 12                 | 26.3, CH <sub>2</sub>      | 1.37–1.71, m                             | 25.5, CH <sub>2</sub>      | 1.40–1.73, m                             | 26.3, CH <sub>2</sub>      | 1.20–1.72, m                             |
| 13                 | 22.4, CH <sub>2</sub>      | 1.37–1.71, m                             | 22.6, CH <sub>2</sub>      | 1.40–1.73, m                             | 22.3, CH <sub>2</sub>      | 1.20–1.72, m                             |
| 14                 | 33.6, CH <sub>2</sub>      | 1.92, m                                  | 34.2, CH <sub>2</sub>      | 1.92, m                                  | 33.6, CH <sub>2</sub>      | 1.93, m                                  |
|                    |                            | 1.58–1.71, m                             |                            | 1.82, m                                  |                            | 1.58–1.72, m                             |
| 15                 | 73.4, CH                   | 5.17, m                                  | 76.0, CH                   | 5.16, m                                  | 73.5, CH                   | 5.17, m                                  |
| 16                 | 19.9, CH <sub>3</sub>      | 1.30, d (6.4)                            | 20.4, CH <sub>3</sub>      | 1.35, d (6.2)                            | 19.9, CH <sub>3</sub>      | 1.31, d (6.4)                            |
| 3-OCH <sub>3</sub> | 56.3, CH <sub>3</sub>      | 3.75, s                                  |                            |                                          | 56.4, CH <sub>3</sub>      | 3.79, s                                  |
| 5-OCH <sub>3</sub> |                            |                                          | 55.7, CH <sub>3</sub>      | 3.78, s                                  | 55.8, CH <sub>3</sub>      | 3.80, s                                  |

**Table S2.2. Compounds 2a, 2b and 2c (in CDCl<sub>3</sub>).**

| no.                | 2a                    |                                      | 2b                    |                                      | 2c                    |                                      |
|--------------------|-----------------------|--------------------------------------|-----------------------|--------------------------------------|-----------------------|--------------------------------------|
|                    | $\delta_C$ , type     | $\delta_H$ , mult. ( <i>J</i> in Hz) | $\delta_C$ , type     | $\delta_H$ , mult. ( <i>J</i> in Hz) | $\delta_C$ , type     | $\delta_H$ , mult. ( <i>J</i> in Hz) |
| 1                  | 168.9, C              |                                      | 171.4, C              |                                      | 167.9, C              |                                      |
| 2                  | 115.7, C              |                                      | 104.8, C              |                                      | 116.4, C              |                                      |
| 3                  | 158.0, C              |                                      | 164.6, C              |                                      | 157.5, C              |                                      |
| 4                  | 97.9, CH              | 6.25, d (2.4)                        | 99.6, CH              | 6.35, d (2.8)                        | 97.2, CH              | 6.32, d (2.4)                        |
| 5                  | 157.9, C              |                                      | 163.8, C              |                                      | 161.1, C              |                                      |
| 6                  | 105.0, CH             | 6.31, d (2.4)                        | 108.0, CH             | 6.34, d (2.8)                        | 102.1, CH             | 6.40, d (2.4)                        |
| 7                  | 138.6, C              |                                      | 144.0, C              |                                      | 138.1, C              |                                      |
| 8                  | 130.5, CH             | 6.23, d (15.1)                       | 136.0, CH             | 6.69, d (15.6)                       | 130.6, CH             | 6.29, d (16.0)                       |
| 9                  | 133.0, CH             | 5.77, dt (15.1, 6.0)                 | 128.9, CH             | 5.70, m                              | 132.6, CH             | 5.85, dt (16.0, 6.0)                 |
| 10                 | 30.7, CH <sub>2</sub> | 2.20, m                              | 31.0, CH <sub>2</sub> | 2.16, m                              | 30.7, CH <sub>2</sub> | 2.28, m                              |
|                    |                       | 2.31, m                              |                       | 2.31, m                              |                       |                                      |
| 11                 | 30.0, CH <sub>2</sub> | 2.23, m                              | 30.9, CH <sub>2</sub> | 2.16, m                              | 29.8, CH <sub>2</sub> | 2.24, m                              |
|                    |                       | 2.31, m                              |                       | 2.31, m                              |                       | 2.30, m                              |
| 12                 | 132.5, CH             | 5.28, m                              | 134.3, CH             | 5.36, m                              | 132.5, CH             | 5.23, m                              |
| 13                 | 128.6, CH             | 5.39, m                              | 126.6, CH             | 5.36, m                              | 128.6, CH             | 5.40, ddd (4.4, 9.6, 15.2)           |
| 14                 | 40.2, CH <sub>2</sub> | 2.31, m                              | 39.1, CH <sub>2</sub> | 2.31, m                              | 40.1, CH <sub>2</sub> | 2.24, m                              |
|                    |                       | 2.41, brd (14.1)                     |                       | 2.51, dt (15.2, 4.4)                 |                       | 2.40, brd (14.0)                     |
| 15                 | 71.9, CH              | 5.28, m                              | 72.0, CH              | 5.13, m                              | 71.3, CH              | 5.30, m                              |
| 16                 | 20.9, CH <sub>3</sub> | 1.34, d (6.4)                        | 20.1, CH <sub>3</sub> | 1.41, d (6.4)                        | 20.8, CH <sub>3</sub> | 1.33, d (6.4)                        |
| 3-OCH <sub>3</sub> | 56.0, CH <sub>3</sub> | 3.69, s                              |                       |                                      | 55.9, CH <sub>3</sub> | 3.77, s                              |
| 5-OCH <sub>3</sub> |                       |                                      | 55.4, CH <sub>3</sub> | 3.79, s                              | 55.4, CH <sub>3</sub> | 3.78, s                              |
| 3-OH               |                       |                                      |                       | 11.60, s                             |                       |                                      |

**Table S2.3. Compounds 3a, 3b and 3c (in DMSO-*d*<sub>6</sub>).**

| no.                | <b>3a</b>                  |                                               | <b>3b</b>                  |                                               | <b>3c</b>                  |                                               |
|--------------------|----------------------------|-----------------------------------------------|----------------------------|-----------------------------------------------|----------------------------|-----------------------------------------------|
|                    | $\delta_{\text{C}}$ , type | $\delta_{\text{H}}$ , mult. ( <i>J</i> in Hz) | $\delta_{\text{C}}$ , type | $\delta_{\text{H}}$ , mult. ( <i>J</i> in Hz) | $\delta_{\text{C}}$ , type | $\delta_{\text{H}}$ , mult. ( <i>J</i> in Hz) |
| 1                  | 167.4, C                   |                                               | 168.2, C                   |                                               | 167.2, C                   |                                               |
| 2                  | 114.9, C                   |                                               | 113.5, C                   |                                               | 116.4, C                   |                                               |
| 3                  | 157.2, C                   |                                               | 156.9, C                   |                                               | 157.1, C                   |                                               |
| 4                  | 97.9, CH                   | 6.31, d (2.0)                                 | 100.0, CH                  | 6.30, d (2.4)                                 | 97.49, CH                  | 6.47, d (2.0)                                 |
| 5                  | 159.0, C                   |                                               | 160.9, C                   |                                               | 160.8, C                   |                                               |
| 6                  | 102.3, CH                  | 6.50, d (2.0)                                 | 100.7, CH                  | 6.56, d (2.4)                                 | 100.2, CH                  | 6.69, d (2.0)                                 |
| 7                  | 135.6, C                   |                                               | 137.2, C                   |                                               | 135.7, C                   |                                               |
| 8                  | 125.6, CH                  | 6.15, brs                                     | 126.6, CH                  | 6.34, d (16.0)                                | 125.6, CH                  | 6.17, d (16.0)                                |
| 9                  | 131.8, CH                  | 6.15, brs                                     | 132.1, CH                  | 6.24, dt (16.0, 5.6)                          | 132.5, CH                  | 6.35, dt (16.0, 5.2)                          |
| 10                 | 29.1, CH <sub>2</sub>      | 2.13–2.23, m                                  | 29.4, CH <sub>2</sub>      | 2.13–2.24, m                                  | 29.1, CH <sub>2</sub>      | 2.19–2.25, m                                  |
| 11                 | 21.5, CH <sub>2</sub>      | 1.47–1.51, m                                  | 21.4, CH <sub>2</sub>      | 1.47–1.52, m                                  | 21.5, CH <sub>2</sub>      | 1.39–1.51, m                                  |
| 12                 | 35.1, CH <sub>2</sub>      | 1.37–1.47, m                                  | 34.9, CH <sub>2</sub>      | 1.43–1.45, m                                  | 35.2, CH <sub>2</sub>      | 1.37–1.48, m                                  |
| 13                 | 70.6, CH                   | 3.68, brs                                     | 70.5, CH                   | 3.91, brs                                     | 70.6, CH                   | 3.84, m                                       |
| 14                 | 136.7, CH                  | 5.44–5.50, m                                  | 136.9, CH                  | 5.44–5.58, m                                  | 136.8, CH                  | 5.41–5.55, m                                  |
| 15                 | 125.7, CH                  | 5.44–5.50, m                                  | 125.3, CH                  | 5.44–5.58, m                                  | 125.5, CH                  | 5.41–5.55, m                                  |
| 16                 | 38.4, CH <sub>2</sub>      | 2.22–2.49, m                                  | 38.2, CH <sub>2</sub>      | 2.24–2.43, m                                  | 38.4, CH <sub>2</sub>      | 2.22–2.41, m                                  |
| 17                 | 70.6, CH                   | 5.11, m                                       | 70.9, CH                   | 5.14, m                                       | 70.7, CH                   | 5.13, m                                       |
| 18                 | 20.6, CH <sub>3</sub>      | 1.26, d (6.0)                                 | 20.3, CH <sub>3</sub>      | 2.56, d (6.4)                                 | 20.6, CH <sub>3</sub>      | 1.26, d (6.4)                                 |
| 3-OCH <sub>3</sub> | 55.7, CH <sub>3</sub>      | 3.68, s                                       |                            |                                               | 56.0, CH <sub>3</sub>      | 3.73, s                                       |
| 5-OCH <sub>3</sub> |                            |                                               | 55.2, CH <sub>3</sub>      | 3.73, s                                       | 55.4, CH <sub>3</sub>      | 3.79, s                                       |
| 13-OH              |                            | 4.62, brs                                     |                            | 4.63, d (4.0)                                 |                            | 4.62, d (4.4)                                 |
| 3-OH               |                            |                                               |                            | 10.09, brs                                    |                            |                                               |
| 5-OH               |                            | 9.74, brs                                     |                            |                                               |                            |                                               |

**Table S2.4. Compounds 4a, 4b, 4c (in methanol-*d*<sub>4</sub>) and 5a (in CDCl<sub>3</sub>).**

| no.                | 4a                         |                                               | 4b                         |                                               | 4c                         |                                               | 5a                         |                                               |
|--------------------|----------------------------|-----------------------------------------------|----------------------------|-----------------------------------------------|----------------------------|-----------------------------------------------|----------------------------|-----------------------------------------------|
|                    | $\delta_{\text{C}}$ , type | $\delta_{\text{H}}$ , mult. ( <i>J</i> in Hz) | $\delta_{\text{C}}$ , type | $\delta_{\text{H}}$ , mult. ( <i>J</i> in Hz) | $\delta_{\text{C}}$ , type | $\delta_{\text{H}}$ , mult. ( <i>J</i> in Hz) | $\delta_{\text{C}}$ , type | $\delta_{\text{H}}$ , mult. ( <i>J</i> in Hz) |
| 1                  | 170.3, C                   |                                               | 171.9, C                   |                                               | 170.0, C                   |                                               | 168.7, C                   |                                               |
| 2                  | 116.4, C                   |                                               | 109.6, C                   |                                               | 117.7, C                   |                                               | 116.2, C                   |                                               |
| 3                  | 160.6, C                   |                                               | 164.4, C                   |                                               | 159.0, C                   |                                               | 159.1, C                   |                                               |
| 4                  | 104.4, CH                  | 6.55, d (2.0)                                 | 106.2, CH                  | 6.56, d (2.0)                                 | 98.4, CH                   | 6.47, d (2.1)                                 | 98.7, CH                   | 6.21, d (2.0)                                 |
| 5                  | 159.1, C                   |                                               | 162.5, C                   |                                               | 162.9, C                   |                                               | 158.7, C                   |                                               |
| 6                  | 98.9, CH                   | 6.31, d (2.0)                                 | 100.8, CH                  | 6.34, d (2.0)                                 | 102.4, CH                  | 6.68, d (2.1)                                 | 110.4, CH                  | 6.18, d (2.0)                                 |
| 7                  | 138.1, C                   |                                               | 140.1, C                   |                                               | 138.0, C                   |                                               | 133.9, C                   |                                               |
| 8                  | 129.0, CH                  | 6.31, d (15.8)                                | 131.8, CH                  | 6.69, dt (15.8, 1.5)                          | 128.8, CH                  | 6.35, d (15.8)                                | 46.3, CH <sub>2</sub>      | 4.28, d (17.6)<br>3.48, d (17.6)              |
| 9                  | 134.2, CH                  | 6.08, ddd (15.8, 8.6, 5.1)                    | 133.7, CH                  | 6.03, ddd (15.8, 8.6, 5.1)                    | 134.7, CH                  | 6.17, ddd (15.8, 8.5, 5.1)                    | 211.0, C                   |                                               |
| 10                 | 31.3, CH <sub>2</sub>      | 2.26, m                                       | 31.9, CH <sub>2</sub>      | 2.30, m                                       | 31.3, CH <sub>2</sub>      | 2.28, m                                       | 41.8, CH <sub>2</sub>      | 2.56, m<br>2.33, m                            |
| 11                 | 23.9, CH <sub>2</sub>      | 1.15–1.85, m                                  | 23.7, CH <sub>2</sub>      | 1.25–1.93, m                                  | 23.8, CH <sub>2</sub>      | 1.21–1.88, m                                  | 22.5, CH <sub>2</sub>      | 1.16–1.70, m                                  |
| 12                 | 33.2, CH <sub>2</sub>      | 1.15–1.85, m                                  | 32.7, CH <sub>2</sub>      | 1.25–1.93, m                                  | 33.3, CH <sub>2</sub>      | 1.21–1.88, m                                  | 25.6, CH <sub>2</sub>      | 1.16–1.70, m                                  |
| 13                 | 69.5, CH                   | 3.62, m                                       | 69.4, CH                   | 3.71, m                                       | 69.5, CH                   | 3.62, m                                       | 25.5, CH <sub>2</sub>      | 1.16–1.70, m                                  |
| 14                 | 37.5, CH <sub>2</sub>      | 1.15–1.85, m                                  | 37.2, CH <sub>2</sub>      | 1.25–1.93, m                                  | 37.5, CH <sub>2</sub>      | 1.21–1.88, m                                  | 26.4, CH <sub>2</sub>      | 1.16–1.70, m                                  |
| 15                 | 20.5, CH <sub>2</sub>      | 1.15–1.85, m                                  | 20.4, CH <sub>2</sub>      | 1.25–1.93, m                                  | 20.5, CH <sub>2</sub>      | 1.21–1.88, m                                  | 23.3, CH <sub>2</sub>      | 1.16–1.70, m                                  |
| 16                 | 35.9, CH <sub>2</sub>      | 1.15–1.85, m                                  | 35.6, CH <sub>2</sub>      | 1.25–1.93, m                                  | 35.9, CH <sub>2</sub>      | 1.21–1.88, m                                  | 35.0, CH <sub>2</sub>      | 1.16–1.70, m                                  |
| 17                 | 72.3, CH                   | 5.28, m                                       | 74.1, CH                   | 5.17, m                                       | 72.4, CH                   | 5.29, m                                       | 71.0, CH                   | 5.23, m                                       |
| 18                 | 19.6, CH <sub>3</sub>      | 1.28, d (6.5)                                 | 19.1, CH <sub>3</sub>      | 1.34, d (6.5)                                 | 19.6, CH <sub>3</sub>      | 1.28, d (6.5)                                 | 20.5, CH <sub>3</sub>      | 1.31, d (6.3)                                 |
| 3-OCH <sub>3</sub> | 56.3, CH <sub>3</sub>      | 3.76, s                                       |                            |                                               | 56.5, CH <sub>3</sub>      | 3.79, s                                       | 55.8, CH <sub>3</sub>      | 3.71, s                                       |
| 5-OCH <sub>3</sub> |                            |                                               | 55.8, CH <sub>3</sub>      | 3.80, s                                       | 55.9, CH <sub>3</sub>      | 3.83, s                                       |                            |                                               |

**Table S2.5. Compounds 6a, 6b and 6c (in methanol-*d*<sub>4</sub>).**

| no.                | <b>6a</b>                  |                                                          | <b>6b</b>                  |                                                          | <b>6c</b>                  |                                                          |
|--------------------|----------------------------|----------------------------------------------------------|----------------------------|----------------------------------------------------------|----------------------------|----------------------------------------------------------|
|                    | $\delta_{\text{C}}$ , type | $\delta_{\text{H}}$ , mult. ( <i>J</i> in Hz)            | $\delta_{\text{C}}$ , type | $\delta_{\text{H}}$ , mult. ( <i>J</i> in Hz)            | $\delta_{\text{C}}$ , type | $\delta_{\text{H}}$ , mult. ( <i>J</i> in Hz)            |
| 1                  | 173.2, C                   |                                                          | 173.4, C                   |                                                          | 173.1, C                   |                                                          |
| 2                  | 38.7, CH <sub>2</sub>      | 3.87, d (17.0)<br>3.49, d (17.0)                         | 39.3, CH <sub>2</sub>      | 3.99, d (17.0)<br>3.56, d (17.0)                         | 38.7, CH <sub>2</sub>      | 3.91, d (17.0)<br>3.56, d (17.0)                         |
| 3                  | 135.7, C                   |                                                          | 136.3, C                   |                                                          | 135.5, C                   |                                                          |
| 4                  | 112.0, CH                  | 6.32, d (2.2)                                            | 110.6, CH                  | 6.36, d (2.2)                                            | 110.0, CH                  | 6.54, d (2.2)                                            |
| 5                  | 160.6, C                   |                                                          | 163.0, C                   |                                                          | 163.0, C                   |                                                          |
| 6                  | 98.9, CH                   | 6.41, d (2.2)                                            | 101.1, CH                  | 6.34, d (2.2)                                            | 98.3, CH                   | 6.47, d (2.2)                                            |
| 7                  | 161.1, C                   |                                                          | 159.2, C                   |                                                          | 160.2, C                   |                                                          |
| 8                  | 123.9, C                   |                                                          | 122.9, C                   |                                                          | 125.3, C                   |                                                          |
| 9                  | 209.8, C                   |                                                          | 209.8, C                   |                                                          | 209.6, C                   |                                                          |
| 10                 | 44.4, CH <sub>2</sub>      | 2.91, ddd (16.6, 8.6, 3.7)<br>2.76, ddd (16.6, 7.8, 3.9) | 44.3, CH <sub>2</sub>      | 3.01, ddd (16.6, 8.6, 3.7)<br>2.84, ddd (16.6, 7.8, 3.9) | 44.4, CH <sub>2</sub>      | 2.91, ddd (16.6, 8.6, 3.7)<br>2.77, ddd (16.6, 7.8, 3.9) |
| 11                 | 28.1, CH <sub>2</sub>      | 1.20–1.44, m                                             | 28.0, CH <sub>2</sub>      | 1.20–1.44, m                                             | 28.1, CH <sub>2</sub>      | 1.20–1.44, m                                             |
| 12                 | 24.5, CH <sub>2</sub>      | 1.58, m<br>1.50, m                                       | 24.6, CH <sub>2</sub>      | 1.58, m<br>1.50, m                                       | 24.4, CH <sub>2</sub>      | 1.58, m<br>1.50, m                                       |
| 13                 | 27.5, CH <sub>2</sub>      | 1.20–1.44, m                                             | 27.6, CH <sub>2</sub>      | 1.20–1.44, m                                             | 27.6, CH <sub>2</sub>      | 1.20–1.44, m                                             |
| 14                 | 27.1, CH <sub>2</sub>      | 1.20–1.44, m                                             | 27.0, CH <sub>2</sub>      | 1.20–1.44, m                                             | 27.1, CH <sub>2</sub>      | 1.20–1.44, m                                             |
| 15                 | 22.6, CH <sub>2</sub>      | 1.41, m<br>1.27, m                                       | 22.6, CH <sub>2</sub>      | 1.41, m<br>1.27, m                                       | 22.6, CH <sub>2</sub>      | 1.41, m<br>1.27, m                                       |
| 16                 | 34.9, CH <sub>2</sub>      | 1.54, m                                                  | 35.0, CH <sub>2</sub>      | 1.54, m                                                  | 34.9, CH <sub>2</sub>      | 1.54, m                                                  |
| 17                 | 71.9, CH                   | 4.95, m                                                  | 71.9, CH                   | 4.97, m                                                  | 72.0, CH                   | 4.98, m                                                  |
| 18                 | 20.4, CH <sub>3</sub>      | 1.18, d (6.3)                                            | 20.5, CH <sub>3</sub>      | 1.19, d (6.3)                                            | 20.4, CH <sub>3</sub>      | 1.19, d (6.3)                                            |
| 5-OCH <sub>3</sub> |                            |                                                          | 55.7, CH <sub>3</sub>      | 3.77, s                                                  | 55.9, CH <sub>3</sub>      | 3.83, s                                                  |
| 7-OCH <sub>3</sub> | 56.1, CH <sub>3</sub>      | 3.80, s                                                  |                            |                                                          | 56.2, CH <sub>3</sub>      | 3.84, s                                                  |



**Table S2.6. Compounds 7a, 7b and 7c (in methanol-*d*<sub>4</sub>).**

| no.                | 7a                         |                                               | 7b                         |                                               | 7c                         |                                               |
|--------------------|----------------------------|-----------------------------------------------|----------------------------|-----------------------------------------------|----------------------------|-----------------------------------------------|
|                    | $\delta_{\text{C}}$ , type | $\delta_{\text{H}}$ , mult. ( <i>J</i> in Hz) | $\delta_{\text{C}}$ , type | $\delta_{\text{H}}$ , mult. ( <i>J</i> in Hz) | $\delta_{\text{C}}$ , type | $\delta_{\text{H}}$ , mult. ( <i>J</i> in Hz) |
| 1                  | 170.5, C                   |                                               | 172.4, C                   |                                               | 170.3, C                   |                                               |
| 2                  | 115.4, C                   |                                               | 106.2, C                   |                                               | 116.8, C                   |                                               |
| 3                  | 159.6, C                   |                                               | 165.2, C                   |                                               | 159.4, C                   |                                               |
| 4                  | 98.8, CH                   | 6.35, d (2.0)                                 | 100.6, CH                  | 6.36, d (2.4)                                 | 98.2, CH                   | 6.46, d (2.0)                                 |
| 5                  | 160.8, C                   |                                               | 164.9, C                   |                                               | 163.0, C                   |                                               |
| 6                  | 104.9, CH                  | 6.55, d (2.0)                                 | 108.0, CH                  | 6.47, d (2.4)                                 | 102.7, CH                  | 6.65, d (2.0)                                 |
| 7                  | 139.0, C                   |                                               | 144.3, C                   |                                               | 138.9, C                   |                                               |
| 8                  | 128.0, CH                  | 6.33, brd (15.0)                              | 132.1, CH                  | 6.91, dt (15.6, 1.5)                          | 127.9, CH                  | 6.34, dt (16.0, 1.5)                          |
| 9                  | 134.7, CH                  | 6.17, dt (15.0, 6.7)                          | 133.6, CH                  | 5.95, dt (15.6, 6.8)                          | 135.2, CH                  | 6.24, dt (16.0, 6.4)                          |
| 10                 | 34.1, CH <sub>2</sub>      | 2.20, m                                       | 34.1, CH <sub>2</sub>      | 2.22, m                                       | 34.1, CH <sub>2</sub>      | 2.20, m                                       |
| 11                 | 26.4, CH <sub>2</sub>      | 1.41–1.65, m                                  | 26.6, CH <sub>2</sub>      | 1.45–1.62, m                                  | 26.4, CH <sub>2</sub>      | 1.52–1.65, m                                  |
| 12                 | 39.6, CH <sub>2</sub>      | 1.41–1.65, m                                  | 39.8, CH <sub>2</sub>      | 1.48–1.55, m                                  | 39.6, CH <sub>2</sub>      | 1.40–1.52, m                                  |
| 13                 | 68.4, CH                   | 3.74, m                                       | 68.4, CH                   | 3.75, m                                       | 68.4, CH                   | 3.74, m                                       |
| 14                 | 23.5, CH <sub>3</sub>      | 1.17, d (6.1)                                 | 23.6, CH <sub>3</sub>      | 1.17, d (6.2)                                 | 23.6, CH <sub>3</sub>      | 1.16, d (6.4)                                 |
| 15                 | 62.2, CH <sub>2</sub>      | 4.32, q (7.0)                                 | 62.4, CH <sub>2</sub>      | 4.37, q (7.2)                                 | 62.3, CH <sub>2</sub>      | 4.32, q (7.2)                                 |
| 16                 | 14.6, CH <sub>3</sub>      | 1.35, t (7.0)                                 | 14.7, CH <sub>3</sub>      | 1.40, t (7.2)                                 | 14.6, CH <sub>3</sub>      | 1.34, t (7.2)                                 |
| 3-OCH <sub>3</sub> | 56.3, CH <sub>3</sub>      | 3.76, s                                       |                            |                                               | 56.4, CH <sub>3</sub>      | 3.79, s                                       |
| 5-OCH <sub>3</sub> |                            |                                               | 55.9, CH <sub>3</sub>      | 3.81, s                                       | 55.9, CH <sub>3</sub>      | 3.83, s                                       |

**Table S2.7. Compounds 8a, 8b and 8c (in methanol-*d*<sub>4</sub>).**

| no.                | 8a                         |                                               | 8b                         |                                               | 8c                         |                                               |
|--------------------|----------------------------|-----------------------------------------------|----------------------------|-----------------------------------------------|----------------------------|-----------------------------------------------|
|                    | $\delta_{\text{C}}$ , type | $\delta_{\text{H}}$ , mult. ( <i>J</i> in Hz) | $\delta_{\text{C}}$ , type | $\delta_{\text{H}}$ , mult. ( <i>J</i> in Hz) | $\delta_{\text{C}}$ , type | $\delta_{\text{H}}$ , mult. ( <i>J</i> in Hz) |
| 1                  | 170.5, C                   |                                               | 172.3, C                   |                                               | 170.3, C                   |                                               |
| 2                  | 115.4, C                   |                                               | 106.3, C                   |                                               | 116.8, C                   |                                               |
| 3                  | 159.6, C                   |                                               | 165.2, C                   |                                               | 159.4, C                   |                                               |
| 4                  | 98.8, CH                   | 6.34, d (2.0)                                 | 100.7, CH                  | 6.36, d (2.4)                                 | 98.2, CH                   | 6.46, d (2.0)                                 |
| 5                  | 160.8, C                   |                                               | 164.9, C                   |                                               | 163.0, C                   |                                               |
| 6                  | 104.9, CH                  | 6.53, d (2.0)                                 | 108.0, CH                  | 6.47, d (2.4)                                 | 102.7, CH                  | 6.65, d (2.0)                                 |
| 7                  | 139.0, C                   |                                               | 144.4, C                   |                                               | 138.9, C                   |                                               |
| 8                  | 128.0, CH                  | 6.32, dt (15.6, 1.4)                          | 132.1, CH                  | 6.91, dt (15.6, 1.5)                          | 127.9, CH                  | 6.34, dt (16.0, 1.5)                          |
| 9                  | 134.7, CH                  | 6.16, dt (15.6, 6.8)                          | 133.6, CH                  | 5.95, dt (15.6, 6.8)                          | 135.2, CH                  | 6.24, dt (16.0, 6.4)                          |
| 10                 | 34.1, CH <sub>2</sub>      | 2.20, m                                       | 34.1, CH <sub>2</sub>      | 2.22, m                                       | 34.1, CH <sub>2</sub>      | 2.20, m                                       |
| 11                 | 26.5, CH <sub>2</sub>      | 1.41–1.65, m                                  | 26.5, CH <sub>2</sub>      | 1.45–1.62, m                                  | 26.4, CH <sub>2</sub>      | 1.52–1.65, m                                  |
| 12                 | 39.6, CH <sub>2</sub>      | 1.41–1.65, m                                  | 39.8, CH <sub>2</sub>      | 1.48–1.55, m                                  | 39.6, CH <sub>2</sub>      | 1.40–1.52, m                                  |
| 13                 | 68.4, CH                   | 3.74, m                                       | 68.5, CH                   | 3.75, m                                       | 68.4, CH                   | 3.74, m                                       |
| 14                 | 23.6, CH <sub>3</sub>      | 1.16, d (6.2)                                 | 23.5, CH <sub>3</sub>      | 1.17, d (6.2)                                 | 23.6, CH <sub>3</sub>      | 1.16, d (6.4)                                 |
| 15                 | 62.2, CH <sub>2</sub>      | 4.30, q (7.0)                                 | 62.4, CH <sub>2</sub>      | 4.37, q (7.2)                                 | 62.3, CH <sub>2</sub>      | 4.32, q (7.2)                                 |
| 16                 | 14.6, CH <sub>3</sub>      | 1.34, t (7.0)                                 | 14.7, CH <sub>3</sub>      | 1.40, t (7.2)                                 | 14.6, CH <sub>3</sub>      | 1.34, t (7.2)                                 |
| 3-OCH <sub>3</sub> | 56.3, CH <sub>3</sub>      | 3.76, s                                       |                            |                                               | 56.4, CH <sub>3</sub>      | 3.79, s                                       |
| 5-OCH <sub>3</sub> |                            |                                               | 55.9, CH <sub>3</sub>      | 3.80, s                                       | 55.9, CH <sub>3</sub>      | 3.83, s                                       |

**Table S3. Combinatorial methylation with LtOMT and HsOMT.**

| Substrate    | Chemical structure                                                                  | OMT enzyme    | Total conversion [%] | <i>o</i> -Methoxy product [%] | <i>p</i> -Methoxy product [%] | <i>o,p</i> -Dimethoxy product [%] |
|--------------|-------------------------------------------------------------------------------------|---------------|----------------------|-------------------------------|-------------------------------|-----------------------------------|
| <b>DLD 1</b> | 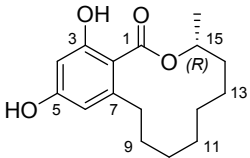   | LtOMT         | 95.9 ± 1.9           | 100                           | 0                             | 0                                 |
|              |                                                                                     | HsOMT         | 41.6 ± 1.2           | 0                             | 100                           | 0                                 |
|              |                                                                                     | LtOMT + HsOMT | 96.5 ± 0.7           | 62.0 ± 2.6                    | 2.7 ± 0.5                     | 35.3 ± 2.9                        |
| <b>1a</b>    |    | HsOMT         | 39.7 ± 0.1           | NA                            | NA                            | 100                               |
| <b>1b</b>    |   | LtOMT         | 97.0 ± 1.8           | NA                            | NA                            | 100                               |
| <b>RDN 2</b> |  | LtOMT         | 96.7 ± 2.7           | 100                           | 0                             | 0                                 |
|              |                                                                                     | HsOMT         | 0                    | NA                            | NA                            | NA                                |
|              |                                                                                     | LtOMT + HsOMT | 98.6 ± 0.1           | 94.7 ± 0.4                    | 0                             | 5.3 ± 0.4                         |
| <b>2a</b>    |  | HsOMT         | 7.7 ± 0.3            | NA                            | NA                            | 100                               |
| <b>2b</b>    |  | LtOMT         | 97.1 ± 1.3           | NA                            | NA                            | 100                               |

|       |                                                                                     |                     |            |            |           |            |
|-------|-------------------------------------------------------------------------------------|---------------------|------------|------------|-----------|------------|
| DHZ 3 | 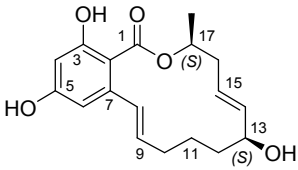   | LtOMT               | 99.5 ± 0.6 | 100        | 0         | 0          |
|       |                                                                                     | HsOMT               | 98.2 ± 0.6 | 0          | 100       | 0          |
|       |                                                                                     | LtOMT<br>+<br>HsOMT | 99.8 ± 0.1 | 70.9 ± 4.9 | 1.0 ± 0.1 | 28.1 ± 4.8 |
| 3a    |    | HsOMT               | 0          | NA         | NA        | NA         |
| 3b    |    | LtOMT               | 98.3 ± 0.6 | NA         | NA        | 100        |
| ZEA 4 |   | LtOMT               | 100        | 100        | 0         | 0          |
|       |                                                                                     | HsOMT               | 72.4 ± 2.0 | 0          | 100       | 0          |
|       |                                                                                     | LtOMT<br>+<br>HsOMT | 92.9 ± 1.6 | 96.0 ± 0.6 | 0         | 4.0 ± 0.6  |
| 4a    |  | HsOMT               | 0          | NA         | NA        | NA         |
| 4b    |  | LtOMT               | 95.4 ± 0.8 | NA         | NA        | 100        |

|         |                                                                                     |               |            |            |            |           |
|---------|-------------------------------------------------------------------------------------|---------------|------------|------------|------------|-----------|
| LCL 5   | 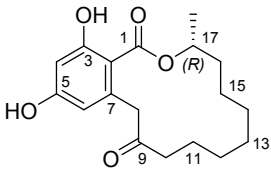   | LtOMT         | 94.6 ± 0.5 | 100        | 0          | 0         |
|         |                                                                                     | HsOMT         | 0          | NA         | NA         | NA        |
|         |                                                                                     | LtOMT + HsOMT | 98.1 ± 0.1 | 100        | 0          | 0         |
| 5a      |    | HsOMT         | 0          | NA         | NA         | NA        |
| LLN 6   |    | LtOMT         | 37.7 ± 1.4 | 100        | 0          | 0         |
|         |                                                                                     | HsOMT         | 30.7 ± 3.1 | 0          | 100        | 0         |
|         |                                                                                     | LtOMT + HsOMT | 24.9 ± 1.9 | 25.7 ± 3.1 | 72.8 ± 3.6 | 1.5 ± 0.5 |
| 6a      |  | HsOMT         | 8.3 ± 0.5  | NA         | NA         | 100       |
| 6b      |  | LtOMT         | 7.0 ± 1.1  | NA         | NA         | 100       |
| ARA 7 7 |  | LtOMT         | 97.4 ± 0.1 | 100        | 0          | 0         |
|         |                                                                                     | HsOMT         | 82.2 ± 1.6 | 0          | 100        | 0         |
|         |                                                                                     | LtOMT + HsOMT | 79.3 ± 1.5 | 94.0 ± 0.7 | 0.9 ± 0.2  | 5.2 ± 0.5 |
| 7a      |  | HsOMT         | 0          | NA         | NA         | NA        |

|               |                                                                                   |                     |            |            |           |           |
|---------------|-----------------------------------------------------------------------------------|---------------------|------------|------------|-----------|-----------|
| <b>7b</b>     | 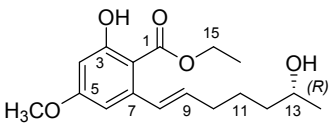 | LtOMT               | 96.8 ± 0.3 | NA         | NA        | 100       |
| <b>ARA8 8</b> |  | LtOMT               | 89.1 ± 1.1 | 100        | 0         | 0         |
|               |                                                                                   | HsOMT               | 95.7 ± 1.2 | 0          | 100       | 0         |
|               |                                                                                   | LtOMT<br>+<br>HsOMT | 82.7 ± 1.3 | 93.8 ± 0.5 | 1.0 ± 0.1 | 5.2 ± 0.4 |
| <b>8a</b>     |  | HsOMT               | 0          | NA         | NA        | NA        |
| <b>8b</b>     |  | LtOMT               | 96.2 ± 0.2 | NA         | NA        | 100       |

*Total conversion*: Numbers show the overall conversion percentage of the indicated substrate into all corresponding methylated products. *Individual products* are shown as their proportion amongst all three *O*-methylated product congeners (Yield of the individual product divided by the total yield of all products, multiplied by 100). Values represent the mean ± SD from three independent experiments of three replicates each (n=9). NA, not applicable. Compound **5b** (5-*O*-methyl LCL) is not produced by the LtOMT or HsOMT enzymes, thus it was not included as a substrate in these experiments.

**Table S4. Methylation of the model substrate DLD (1) with mutant LtOMT enzymes.**

| Mutant LtOMT enzyme | Mutation and/or replacement                | Total conversion [%] | <i>o</i> -Methoxy product [%] | <i>p</i> -Methoxy product [%] | <i>o,p</i> -Dimethoxy product [%] |
|---------------------|--------------------------------------------|----------------------|-------------------------------|-------------------------------|-----------------------------------|
| H1                  | 1-329: HsOMT                               | 3.8 ± 1.1            | 100                           | 0                             | 0                                 |
| H2                  | 330-398: HsOMT                             | 26.1 ± 3.0           | 0                             | 100                           | 0                                 |
| H3                  | 366-398: HsOMT                             | 34.5 ± 0.8           | 76.3 ± 0.9                    | 23.7 ± 0.9                    | 0                                 |
| M1                  | Q384K, G386R, W387H, Q388H                 | 90.0 ± 2.9           | 82.9 ± 0.8                    | 3.7 ± 0.8                     | 13.4 ± 1.5                        |
| M2                  | Q384K, W387H, Q388H                        | 87.0 ± 1.1           | 65.1 ± 7.5                    | 17.1 ± 5.8                    | 17.8 ± 1.7                        |
| M3                  | W387H, Q388H                               | 88.6 ± 5.6           | 69.8 ± 1.2                    | 14.6 ± 0.9                    | 15.7 ± 0.3                        |
| M4                  | W387H                                      | 76.6 ± 20.2          | 92.3 ± 0.3                    | 0                             | 7.7 ± 0.3                         |
| HM1                 | 330-366: HsOMT, Q384K, G386R, W387H, Q388H | 58.3 ± 11.4          | 0                             | 100                           | 0                                 |
| M5                  | F330V, Q384K, G386R, W387H, Q388H          | 88.0 ± 14.0          | 70.9 ± 5.6                    | 13.3 ± 5.6                    | 15.8 ± 8.5                        |
| M6                  | T356M, Q384K, G386R, W387H, Q388H          | 70.1 ± 5.8           | 10.0 ± 1.9                    | 74.3 ± 4.2                    | 15.7 ± 3.1                        |
| M7                  | F330V, T356M, Q384K, G386R, W387H, Q388H   | 93.7 ± 1.1           | 2.9 ± 1.9                     | 94.1 ± 1.0                    | 3.0 ± 1.2                         |
| M8                  | T356M                                      | 80.1 ± 10.2          | 34.4 ± 6.3                    | 31.3 ± 2.3                    | 34.3 ± 8.5                        |
| M9                  | T356M, W387H                               | 96.4 ± 0.7           | 7.0 ± 0.8                     | 1.0 ± 0.1                     | 92.0 ± 0.9                        |
| M10                 | G386R, W387H, Q388H                        | 82.9 ± 8.0           | 80.7 ± 1.5                    | 5.8 ± 0.3                     | 13.5 ± 1.8                        |
| M11                 | Q384K, G386R, Q388H                        | 90.0 ± 4.2           | 90.7 ± 0.2                    | 0                             | 9.3 ± 0.2                         |
| M12                 | Q384K, G386R,                              | 74.7 ± 11.9          | 82.0 ± 2.4                    | 2.7 ± 1.5                     | 15.3 ± 1.0                        |

| W387H |              |             |            |           |            |
|-------|--------------|-------------|------------|-----------|------------|
| M13   | Q384K, G386R | 81.2 ± 0.7  | 100        | 0         | 0          |
| M14   | Q384K, W387H | 89.0 ± 0.1  | 92.2 ± 0.1 | 0         | 7.8 ± 0.1  |
| M15   | Q384K, Q388H | 96.2 ± 0.1  | 100        | 0         | 0          |
| M16   | G386R, W387H | 78.6 ± 12.7 | 84.7 ± 0.7 | 2.7 ± 0.6 | 12.6 ± 0.2 |
| M17   | G386R, Q388H | 89.9 ± 2.0  | 89.8 ± 1.6 | 0         | 10.2 ± 1.6 |
| M18   | Q384K        | 92.7 ± 0.5  | 100        | 0         | 0          |
| M19   | G386R        | 93.0 ± 0.5  | 100        | 0         | 0          |
| M20   | Q388H        | 98.1 ± 0.1  | 100        | 0         | 0          |

*Total conversion:* Numbers show the overall conversion percentage of the indicated substrate into all corresponding methylated products. *Individual products* are shown as their proportion amongst all three *O*-methylated product congeners (Yield of the individual product divided by the total yield of all products, multiplied by 100). Values represent the mean ± SD from three independent experiments of three replicates each (n=9).



**Table S5. Combinatorial methylation with selected LtOMT variants.**

| Substrate | Chemical structure                                                                  | Mutant OMT enzyme | Total conversion [%] | <i>o</i> -Methoxy product [%] | <i>p</i> -Methoxyproduct [%] | <i>o,p</i> -Dimethoxy product [%] |
|-----------|-------------------------------------------------------------------------------------|-------------------|----------------------|-------------------------------|------------------------------|-----------------------------------|
| DLD 1     | 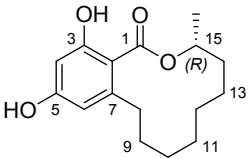   | M1                | 90.0 ± 2.9           | 82.9 ± 0.8                    | 3.7 ± 0.8                    | 13.4 ± 1.5                        |
|           |                                                                                     | M6                | 70.1 ± 5.8           | 10.0 ± 1.9                    | 74.3 ± 4.2                   | 15.7 ± 3.1                        |
|           |                                                                                     | M7                | 93.7 ± 1.1           | 2.9 ± 1.9                     | 94.1 ± 1.0                   | 3.0 ± 1.2                         |
|           |                                                                                     | M8                | 80.1 ± 10.2          | 34.4 ± 6.3                    | 31.3 ± 2.3                   | 34.3 ± 8.5                        |
|           |                                                                                     | M9                | 96.4 ± 0.7           | 7.0 ± 0.8                     | 1.0 ± 0.1                    | 92.0 ± 0.9                        |
| 1a        |    | M1                | 0                    | NA                            | NA                           | NA                                |
|           |                                                                                     | M6                | 14.9 ± 0.7           | NA                            | NA                           | 100                               |
|           |                                                                                     | M7                | 15.0 ± 1.2           | NA                            | NA                           | 100                               |
|           |                                                                                     | M8                | 15.4 ± 2.7           | NA                            | NA                           | 100                               |
|           |                                                                                     | M9                | 74.7 ± 2.1           | NA                            | NA                           | 100                               |
| 1b        |  | M1                | 84.5 ± 2.4           | NA                            | NA                           | 100                               |
|           |                                                                                     | M6                | 19.7 ± 1.4           | NA                            | NA                           | 100                               |
|           |                                                                                     | M7                | 20.0 ± 1.1           | NA                            | NA                           | 100                               |
|           |                                                                                     | M8                | 69.6 ± 3.6           | NA                            | NA                           | 100                               |
|           |                                                                                     | M9                | 84.9 ± 3.2           | NA                            | NA                           | 100                               |
| RDN 2     |  | M1                | 97.3 ± 1.0           | 94.5 ± 0.7                    | 0                            | 5.5 ± 0.7                         |
|           |                                                                                     | M6                | 93.9 ± 3.5           | 18.1 ± 3.6                    | 15.7 ± 1.1                   | 66.2 ± 3.3                        |
|           |                                                                                     | M7                | 94.2 ± 1.6           | 17.9 ± 1.8                    | 21.1 ± 3.3                   | 61.0 ± 1.5                        |
|           |                                                                                     | M8                | 96.6 ± 0.1           | 16.9 ± 2.3                    | 0                            | 83.1 ± 2.2                        |
|           |                                                                                     | M9                | 99.4 ± 0.1           | 5.1 ± 0.3                     | 0                            | 94.9 ± 0.3                        |
| 2a        |  | M1                | 0                    | NA                            | NA                           | NA                                |
|           |                                                                                     | M6                | 7.5 ± 0.6            | NA                            | NA                           | 100                               |
|           |                                                                                     | M7                | 7.2 ± 0.9            | NA                            | NA                           | 100                               |
|           |                                                                                     | M8                | 18.5 ± 1.1           | NA                            | NA                           | 100                               |
|           |                                                                                     | M9                | 48.0 ± 1.8           | NA                            | NA                           | 100                               |

|           |                                                                                     |    |            |            |           |            |
|-----------|-------------------------------------------------------------------------------------|----|------------|------------|-----------|------------|
| <b>2b</b> | 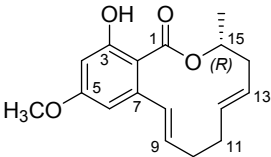   | M1 | 88.3 ± 0.9 | NA         | NA        | 100        |
|           |                                                                                     | M6 | 71.8 ± 1.9 | NA         | NA        | 100        |
|           |                                                                                     | M7 | 72.2 ± 4.5 | NA         | NA        | 100        |
|           |                                                                                     | M8 | 83.2 ± 1.1 | NA         | NA        | 100        |
|           |                                                                                     | M9 | 97.4 ± 0.3 | NA         | NA        | 100        |
| DHZ 3     |    | M1 | 92.1 ± 1.2 | 97.6 ± 0.1 | 1.3 ± 0.1 | 1.1 ± 0.1  |
|           |                                                                                     | M6 | 54.0 ± 2.0 | 77.2 ± 0.9 | 4.7 ± 0.8 | 18.1 ± 0.7 |
|           |                                                                                     | M7 | 63.8 ± 4.3 | 76.2 ± 3.0 | 4.3 ± 0.7 | 19.5 ± 2.4 |
|           |                                                                                     | M8 | 80.5 ± 5.0 | 69.9 ± 1.5 | 1.5 ± 0.2 | 28.6 ± 1.5 |
|           |                                                                                     | M9 | 99.7 ± 0.1 | 73.4 ± 0.6 | 0.5 ± 0.1 | 26.1 ± 0.7 |
| <b>3a</b> |    | M1 | 0          | NA         | NA        | NA         |
|           |                                                                                     | M6 | 0          | NA         | NA        | NA         |
|           |                                                                                     | M7 | 0          | NA         | NA        | NA         |
|           |                                                                                     | M8 | 0          | NA         | NA        | NA         |
|           |                                                                                     | M9 | 0          | NA         | NA        | NA         |
| <b>3b</b> |  | M1 | 100        | NA         | NA        | 100        |
|           |                                                                                     | M6 | 100        | NA         | NA        | 100        |
|           |                                                                                     | M7 | 100        | NA         | NA        | 100        |
|           |                                                                                     | M8 | 100        | NA         | NA        | 100        |
|           |                                                                                     | M9 | 100        | NA         | NA        | 100        |
| ZEA 4     |  | M1 | 91.4 ± 0.7 | 94.6 ± 0.8 | 2.5 ± 0.4 | 2.9 ± 0.5  |
|           |                                                                                     | M6 | 64.3 ± 0.5 | 90.6 ± 1.6 | 4.9 ± 0.8 | 4.5 ± 0.8  |
|           |                                                                                     | M7 | 74.3 ± 1.4 | 91.5 ± 1.1 | 5.2 ± 0.8 | 3.3 ± 0.4  |
|           |                                                                                     | M8 | 69.4 ± 0.7 | 92.6 ± 0.3 | 4.4 ± 0.3 | 3.0 ± 0.1  |
|           |                                                                                     | M9 | 88.0 ± 1.7 | 93.1 ± 0.5 | 1.2 ± 0.1 | 5.7 ± 0.5  |

|              |                                                                                     |    |            |             |             |            |
|--------------|-------------------------------------------------------------------------------------|----|------------|-------------|-------------|------------|
| <b>4a</b>    | 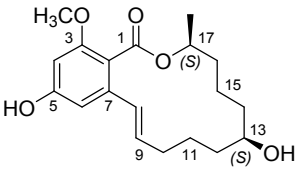   | M1 | 0          | NA          | NA          | NA         |
|              |                                                                                     | M6 | 0          | NA          | NA          | NA         |
|              |                                                                                     | M7 | 0          | NA          | NA          | NA         |
|              |                                                                                     | M8 | 0          | NA          | NA          | NA         |
|              |                                                                                     | M9 | 0          | NA          | NA          | NA         |
| <b>4b</b>    |    | M1 | 94.7 ± 0.5 | NA          | NA          | 100        |
|              |                                                                                     | M6 | 92.0 ± 0.1 | NA          | NA          | 100        |
|              |                                                                                     | M7 | 92.7 ± 0.4 | NA          | NA          | 100        |
|              |                                                                                     | M8 | 92.0 ± 0.3 | NA          | NA          | 100        |
|              |                                                                                     | M9 | 95.7 ± 1.4 | NA          | NA          | 100        |
| <b>LCL 5</b> |    | M1 | 12.8 ± 0.9 | 100         | 0           | 0          |
|              |                                                                                     | M6 | 11.7 ± 0.5 | 100         | 0           | 0          |
|              |                                                                                     | M7 | 11.5 ± 0.6 | 100         | 0           | 0          |
|              |                                                                                     | M8 | 29.3 ± 2.8 | 100         | 0           | 0          |
|              |                                                                                     | M9 | 59.9 ± 8.7 | 100         | 0           | 0          |
| <b>5a</b>    |  | M1 | 0          | NA          | NA          | NA         |
|              |                                                                                     | M6 | 0          | NA          | NA          | NA         |
|              |                                                                                     | M7 | 0          | NA          | NA          | NA         |
|              |                                                                                     | M8 | 0          | NA          | NA          | NA         |
|              |                                                                                     | M9 | 0          | NA          | NA          | NA         |
| <b>LLN 6</b> |  | M1 | 4.8 ± 0.5  | 74.3 ± 5.9  | 5.5 ± 5.7   | 20.2 ± 1.0 |
|              |                                                                                     | M6 | 2.6 ± 1.0  | 55.2 ± 10.6 | 13.3 ± 11.6 | 31.5 ± 3.4 |
|              |                                                                                     | M7 | 4.0 ± 0.6  | 51.2 ± 6.5  | 19.9 ± 4.1  | 28.9 ± 4.2 |
|              |                                                                                     | M8 | 4.3 ± 0.4  | 36.3 ± 4.4  | 30.9 ± 6.2  | 32.8 ± 2.5 |
|              |                                                                                     | M9 | 15.8 ± 1.4 | 61.5 ± 4.2  | 8.5 ± 1.0   | 30.0 ± 4.0 |

|           |                                                                                     |    |            |            |            |            |
|-----------|-------------------------------------------------------------------------------------|----|------------|------------|------------|------------|
| <b>6a</b> | 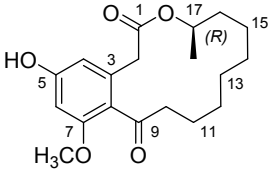   | M1 | 0          | NA         | NA         | NA         |
|           |                                                                                     | M6 | 4.1 ± 0.4  | NA         | NA         | 100        |
|           |                                                                                     | M7 | 4.1 ± 0.2  | NA         | NA         | 100        |
|           |                                                                                     | M8 | 3.5 ± 0.7  | NA         | NA         | 100        |
|           |                                                                                     | M9 | 4.8 ± 0.3  | NA         | NA         | 100        |
| <b>6b</b> |    | M1 | 5.9 ± 0.7  | NA         | NA         | 100        |
|           |                                                                                     | M6 | 4.2 ± 0.5  | NA         | NA         | 100        |
|           |                                                                                     | M7 | 4.0 ± 0.2  | NA         | NA         | 100        |
|           |                                                                                     | M8 | 4.5 ± 0.6  | NA         | NA         | 100        |
|           |                                                                                     | M9 | 5.0 ± 0.1  | NA         | NA         | 100        |
| ARA7 7    |    | M1 | 69.4 ± 1.2 | 93.7 ± 0.7 | 3.3 ± 0.6  | 3.0 ± 0.1  |
|           |                                                                                     | M6 | 47.0 ± 1.3 | 14.1 ± 4.0 | 65.8 ± 5.2 | 20.1 ± 2.2 |
|           |                                                                                     | M7 | 50.0 ± 0.8 | 11.3 ± 3.5 | 70.1 ± 6.9 | 18.7 ± 3.8 |
|           |                                                                                     | M8 | 59.5 ± 2.6 | 23.9 ± 0.8 | 57.6 ± 1.1 | 18.4 ± 0.8 |
|           |                                                                                     | M9 | 89.0 ± 2.8 | 82.1 ± 1.9 | 0.8 ± 0.2  | 17.2 ± 1.8 |
| <b>7a</b> |  | M1 | 0          | NA         | NA         | NA         |
|           |                                                                                     | M6 | 0          | NA         | NA         | NA         |
|           |                                                                                     | M7 | 0          | NA         | NA         | NA         |
|           |                                                                                     | M8 | 0          | NA         | NA         | NA         |
|           |                                                                                     | M9 | 0          | NA         | NA         | NA         |
| <b>7b</b> |  | M1 | 81.8 ± 2.7 | NA         | NA         | 100        |
|           |                                                                                     | M6 | 38.4 ± 4.0 | NA         | NA         | 100        |
|           |                                                                                     | M7 | 55.5 ± 2.1 | NA         | NA         | 100        |
|           |                                                                                     | M8 | 59.1 ± 4.1 | NA         | NA         | 100        |
|           |                                                                                     | M9 | 93.4 ± 3.0 | NA         | NA         | 100        |

|               |  |    |            |            |            |            |
|---------------|--|----|------------|------------|------------|------------|
| ARA8 <b>8</b> |  | M1 | 65.7 ± 2.7 | 92.4 ± 1.1 | 4.0 ± 0.8  | 3.6 ± 0.3  |
|               |  | M6 | 23.5 ± 0.9 | 2.4 ± 0.2  | 78.0 ± 1.3 | 19.6 ± 1.1 |
|               |  | M7 | 25.4 ± 0.8 | 2.9 ± 0.4  | 81.3 ± 2.9 | 15.9 ± 3.2 |
|               |  | M8 | 48.2 ± 0.7 | 13.2 ± 0.8 | 63.9 ± 3.1 | 23.0 ± 2.5 |
|               |  | M9 | 83.3 ± 0.9 | 73.8 ± 1.1 | 7.5 ± 0.6  | 18.7 ± 1.3 |
| <b>8a</b>     |  | M1 | 0          | NA         | NA         | NA         |
|               |  | M6 | 0          | NA         | NA         | NA         |
|               |  | M7 | 0          | NA         | NA         | NA         |
|               |  | M8 | 0          | NA         | NA         | NA         |
|               |  | M9 | 0          | NA         | NA         | NA         |
| <b>8b</b>     |  | M1 | 94.8 ± 0.3 | NA         | NA         | 100        |
|               |  | M6 | 50.1 ± 1.0 | NA         | NA         | 100        |
|               |  | M7 | 51.7 ± 0.7 | NA         | NA         | 100        |
|               |  | M8 | 56.4 ± 1.3 | NA         | NA         | 100        |
|               |  | M9 | 95.8 ± 0.5 | NA         | NA         | 100        |

*Total conversion:* Numbers show the overall conversion percentage of the indicated substrate into all corresponding methylated products. *Individual products* are shown as their proportion amongst all three *O*-methylated product congeners (Yield of the individual product divided by the total yield of all products, multiplied by 100). Values represent the mean ± SD from three independent experiments of three replicates each (n=9). NA, not applicable. Compound **5b** (5-*O*-methyl LCL) is not produced by the LtOMT or HsOMT enzymes, thus it was not included as a substrate in these experiments.

**Table S6. Primers used in this study.**

| Primer Name       | Primer sequence (5'-3')                      | PCR Product<br>(Size in bp)            |
|-------------------|----------------------------------------------|----------------------------------------|
| pACYC-<br>LtOMT_F | CGGAATTCGATGAGATCCTACTCATTGGA                | LtOMT-EcoRI/NotI<br><br>(1,216 bp)     |
| pACYC-<br>LtOMT_R | TAGCGGCCGCTTAACCTCTTTTCAATCTTG               |                                        |
| pACYC-<br>HsOMT_F | CGGAATTCGATGTCTGCTTCTAATGGTGA                | HsOMT-<br>EcoRI/NotI<br><br>(1,216 bp) |
| pACYC-<br>HsOMT_R | TAGCGGCCGCTTAAGCTCTTTTAAATCTTG               |                                        |
| H1-1_F            | AAGCTTCATATGTCTGCTTCTAATGGTGA                | H1-1<br><br>(1,002 bp)                 |
| H1-1_R            | ATCGAAAATCAATAATCTGGATGATGGACCCATAGCACC      |                                        |
| H1-2_F            | TCCAGATTATTGATTTTCGATGCTG                    | H1-2<br><br>(243 bp)                   |
| H1-2_R            | GGTGATGTCCGTTTAACTTAACCTC                    |                                        |
| H2-1_F            | CGACAAGCTTCATATGAGATCCTACTCA                 | H2-1<br><br>(1,006 bp)                 |
| H2-1_R            | TTCGACAATCAACAACCTAGACTTTGG                  |                                        |
| H2-2_F            | TCTAGGTTGTTGATTGTCTGAAGCTG                   | H2-2<br><br>(243 bp)                   |
| H2-2_R            | GGTGATGTCCGTTTAACTTAAGCTC                    |                                        |
| H3-1_F            | CGACAAGCTTCATATGAGATCCTACTC                  | H3-1<br><br>(1,108 bp)                 |
| H3-1_R            | TTCTTTTTCAGTTCTTTCTTTACCACC                  |                                        |
| H3-2_F            | AAGAAAGAACTGAAAAAGAATTTGCAACTTTATTAGGTACAG   | H3-1<br><br>(140 bp)                   |
| H3-2_R            | GGTGATGTCCGTTTAACTTAAGCTC                    |                                        |
| HM1-1_F           | CGACAAGCTTCATATGAGATCCTACTC                  | HM1-1<br><br>(1,108 bp)                |
| HM1-1_R           | TTCTTTTCTGTCTTTCTTTACCACC                    |                                        |
| HM1-2_F           | AAGAAAGAACAGAAAAAGAAACCGCTGCTTTGTTGGATGCTG   | HM1-1<br><br>(140 bp)                  |
| HM1-2_R           | GGTGATGTCCGTTTAACTTAACCTC                    |                                        |
| M2-1_F            | CGACAAGCTTCATATGAGATCCTACTC                  | M2-1<br><br>(1,180 bp)                 |
| M2-1_R            | ACCATGATGACCTGCCTTACCATG                     |                                        |
| M2-2_F            | GGTAAGGCAGGTCATCATGGTGTT                     | M2-2<br><br>(696 bp)                   |
| M2-2_R            | AAACCGTCTATCAGGGCGATG                        |                                        |
| M3-1_F            | CGACAAGCTTCATATGAGATCCTACTC                  | M3-1<br><br>(1,186 bp)                 |
| M3-1_R            | AATAACACCATGATGACCTGCTTGACCATGCCAACTCTAAC    |                                        |
| M3-2_F            | AGAGTTTGCCATGGTCAAGCAGGTCATCATGGTGTTATTGAAGC | M3-2<br><br>(708 bp)                   |
| M3-2_R            | AAACCGTCTATCAGGGCGATG                        |                                        |
| M4-1_F            | CGACAAGCTTCATATGAGATCCTACTC                  | M4-1<br><br>(1,183 bp)                 |
| M4-1_R            | TTCAATAACACCTTGATGACCAGCTTGACCATGCCAAA       |                                        |
| M4-2_F            | CATGGTCAAGCTGGTCATCAAGGTGTTATTGAAGCAAG       | M4-2                                   |

|         |                                            |            |
|---------|--------------------------------------------|------------|
| M4-2_R  | AAACCGTCTATCAGGGCGATG                      | (699 bp)   |
| M5-1_F  | CGACAAGCTTCATATGAGATCCTACTC                | M5-1       |
| M5-1_R  | GAATAACAGCATCGACAATCAATA                   | (993 bp)   |
| M5-2_F  | TTATTGATTGTCGATGCTGTTATTC                  | M5-2       |
| M5-2_R  | GGTGATGTCCGTTTAACTTAACCTC                  | (237 bp)   |
| M6-1_F  | CGACAAGCTTCATATGAGATCCTACTC                | M6-1       |
| M6-1_R  | TCTTTCTTTACCACCCATAGCCAAACCAACGATATCGAT    | (1,096 bp) |
| M6-2_F  | ATCGTTGGTTTGGCTATGGGTGGTAAAGAAAGAACTGAA    | M6-2       |
| M6-2_R  | GGTGATGTCCGTTTAACTTAACCTC                  | (165 bp)   |
| M7-1_F  | CGACAAGCTTCATATGAGATCCTACTC                | M6-1       |
| M7-1_R  | TCTTTCTTTACCACCCATAGCCAAACCAACGATATCGAT    | (1,096 bp) |
| M7-2_F  | ATCGTTGGTTTGGCTATGGGTGGTAAAGAAAGAACTGAA    | M6-2       |
| M7-2_R  | GGTGATGTCCGTTTAACTTAACCTC                  | (165 bp)   |
| M8-1_F  | CGACAAGCTTCATATGAGATCCTACTC                | M6-1       |
| M8-1_R  | TCTTTCTTTACCACCCATAGCCAAACCAACGATATCGAT    | (1,096 bp) |
| M8-2_F  | ATCGTTGGTTTGGCTATGGGTGGTAAAGAAAGAACTGAA    | M6-2       |
| M8-2_R  | GGTGATGTCCGTTTAACTTAACCTC                  | (165 bp)   |
| M9-1_F  | CGACAAGCTTCATATGAGATCCTACTC                | M4-1       |
| M9-1_R  | TTCAATAACACCTTGATGACCAGCTTGACCATGCCAAA     | (1,183 bp) |
| M9-2_F  | CATGGTCAAGCTGGTCATCAAGGTGTTATTGAAGCAAG     | M4-2       |
| M9-2_R  | AAACCGTCTATCAGGGCGATG                      | (699 bp)   |
| M10-1_F | CGACAAGCTTCATATGAGATCCTACTC                | M10-1      |
| M10-1_R | ACCATGATGTCTTGCTTGACCATG                   | (1,180 bp) |
| M10-2_F | GGTCAAGCAAGACATCATGGTGTT                   | M10-2      |
| M10-2_R | AAACCGTCTATCAGGGCGATG                      | (696 bp)   |
| M11-1_F | CGACAAGCTTCATATGAGATCCTACTC                | M11-1      |
| M11-1_R | ACCATGCCATCTTGCCTTACCATG                   | (1,180 bp) |
| M11-2_F | GGTAAGGCAAGATGGCATGGTGTT                   | M11-2      |
| M11-2_R | AAACCGTCTATCAGGGCGATG                      | (696 bp)   |
| M12-1_F | CGACAAGCTTCATATGAGATCCTACTC                | M12-1      |
| M12-1_R | ACCTTGATGTCTTGCCTTACCATG                   | (1,180 bp) |
| M12-2_F | GGTAAGGCAAGACATCAAGGTGTT                   | M12-2      |
| M12-2_R | AAACCGTCTATCAGGGCGATG                      | (696 bp)   |
| M13-1_F | CGACAAGCTTCATATGAGATCCTACTC                | M13-1      |
| M13-1_R | TGCTTCAATAACACCTTGCCATCTTGCCTTACCATGCCA    | (1,192 bp) |
| M13-2_F | CATGGTAAGGCAAGATGGCAAGGTGTTATTGAAGCAAGA    | M13-2      |
| M13-2_R | AAACCGTCTATCAGGGCGATG                      | (699 bp)   |
| M14-1_F | CGACAAGCTTCATATGAGATCCTACTC                | M14-1      |
| M14-1_R | TGCTTCAATAACACCTTGATGACCTGCCTTACCATGCCAAAC | (1,192 bp) |

|                |                                                         |            |
|----------------|---------------------------------------------------------|------------|
| <b>M14-2_F</b> | TGGCATGGTAAGGCAGGTCATCAAGGTGTTATTGAAGCAAGA              | M14-2      |
| <b>M14-2_R</b> | AAACCGTCTATCAGGGCGATG                                   | (702 bp)   |
| <b>M15-1_F</b> | CGACAAGCTTCATATGAGATCCTACTC                             | M15-1      |
| <b>M15-1_R</b> | TTCAATAACACCATGCCAACCTGCCTTACCATGCCAAAC                 | (1,189 bp) |
| <b>M15-2_F</b> | TGGCATGGTAAGGCAGGTTGGCATGGTGTATTGAAGCA                  | M15-2      |
| <b>M15-2_R</b> | AAACCGTCTATCAGGGCGATG                                   | (702 bp)   |
| <b>M16-1_F</b> | CGACAAGCTTCATATGAGATCCTACTC                             | M16-1      |
| <b>M16-1_R</b> | TGCTTCAATAACACCTTGATGTCTTGCTTGACCATGCCAAACTCTA<br>AC    | (1,192 bp) |
| <b>M16-2_F</b> | AGAGTTTGGCATGGTCAAGCAAGACATCAAGGTGTTATTGAAGCA<br>AGATTG | M16-2      |
| <b>M16-2_R</b> | AAACCGTCTATCAGGGCGATG                                   | (708 bp)   |
| <b>M17-1_F</b> | CGACAAGCTTCATATGAGATCCTACTC                             | M17-1      |
| <b>M17-1_R</b> | TTCAATAACACCATGCCATCTTGCTTGACCATGCCAAACTCTAAC           | (1,192 bp) |
| <b>M17-2_F</b> | AGAGTTTGGCATGGTCAAGCAAGATGGCATGGTGTATTGAAGCA<br>AG      | M17-2      |
| <b>M17-2_R</b> | AAACCGTCTATCAGGGCGATG                                   | (708 bp)   |
| <b>M18-1_F</b> | CGACAAGCTTCATATGAGATCCTACTC                             | M18-1      |
| <b>M18-1_R</b> | ACCTTGCCAACCAGCCTTACCATGCCAAACTCTAACAA                  | (1,180 bp) |
| <b>M18-2_F</b> | AGAGTTTGGCATGGTAAGGCTGGTTGGCAAGGTGTTAT                  | M18-2      |
| <b>M18-2_R</b> | AAACCGTCTATCAGGGCGATG                                   | (708 bp)   |
| <b>M19-1_F</b> | CGACAAGCTTCATATGAGATCCTACTC                             | M19-1      |
| <b>M19-1_R</b> | AATAACACCTTGCCATCTAGCTTGACCATGCCAAACTC                  | (1,186 bp) |
| <b>M19-2_F</b> | TGGCATGGTCAAGCTAGATGGCAAGGTGTTATTGAAGC                  | M19-2      |
| <b>M19-2_R</b> | AAACCGTCTATCAGGGCGATG                                   | (702 bp)   |
| <b>M20-1_F</b> | CGACAAGCTTCATATGAGATCCTACTC                             | M20-1      |
| <b>M20-1_R</b> | TGCTTCAATAACACCATGCCAACCAGCTTGACCATGCC                  | (1,192 bp) |
| <b>M20-2_F</b> | GGTCAAGCTGGTTGGCATGGTGTATTGAAGCAAGATT                   | M20-2      |
| <b>M20-2_R</b> | AAACCGTCTATCAGGGCGATG                                   | (696 bp)   |



### 3 SI Figures.

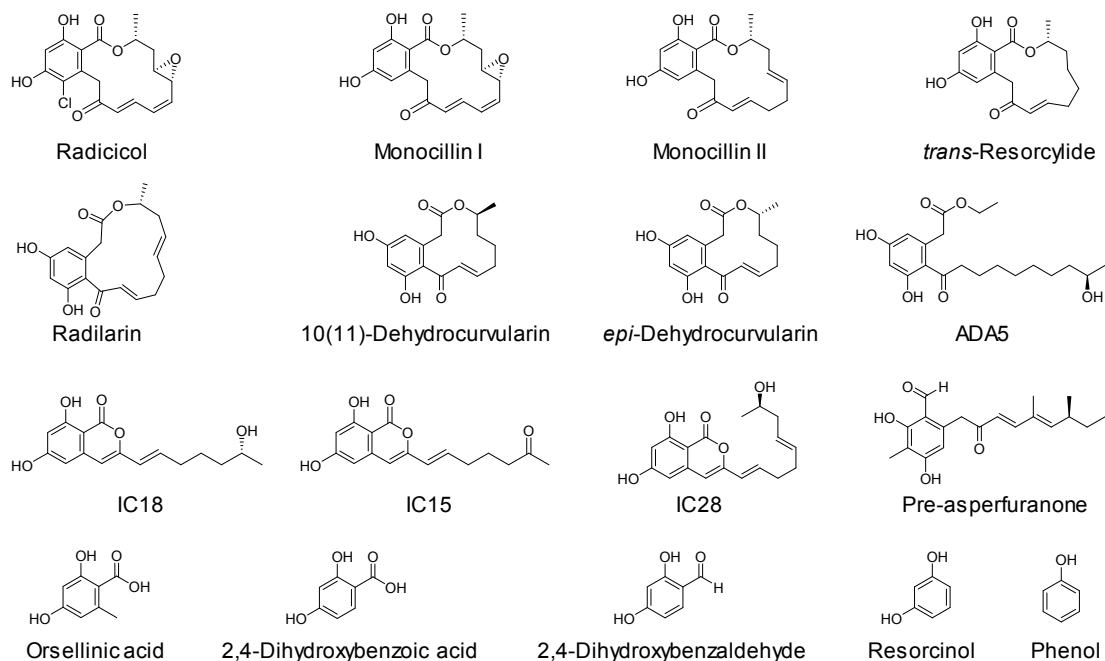

**Figure S1. Compounds not accepted as substrates by LtOMT and HsOMT.**

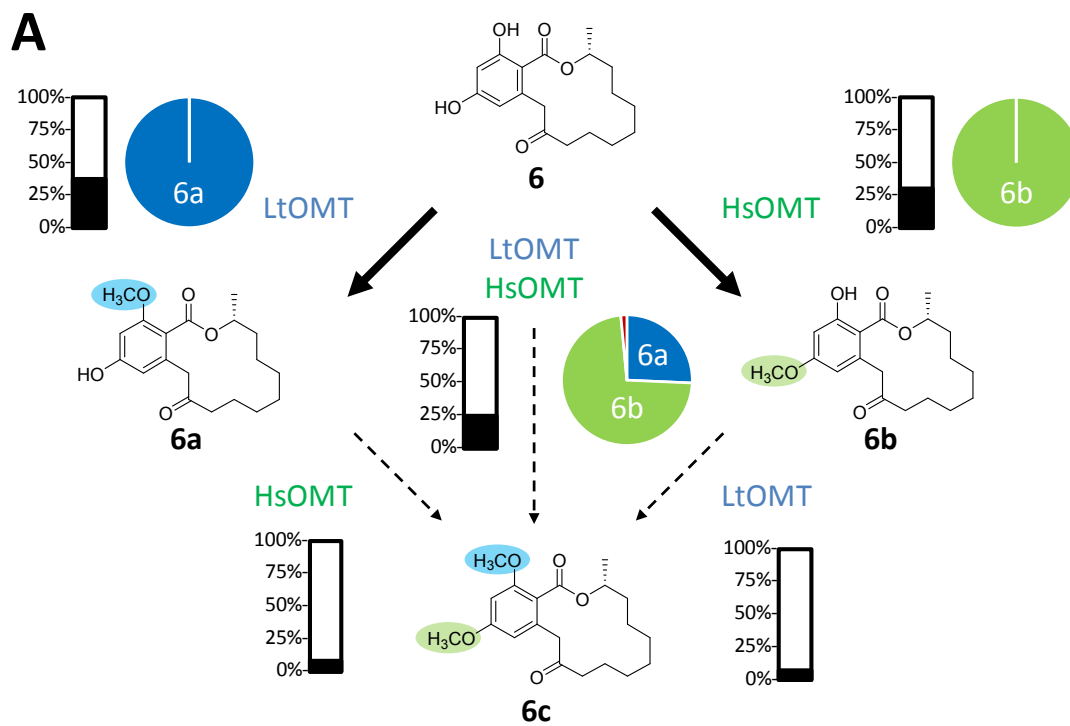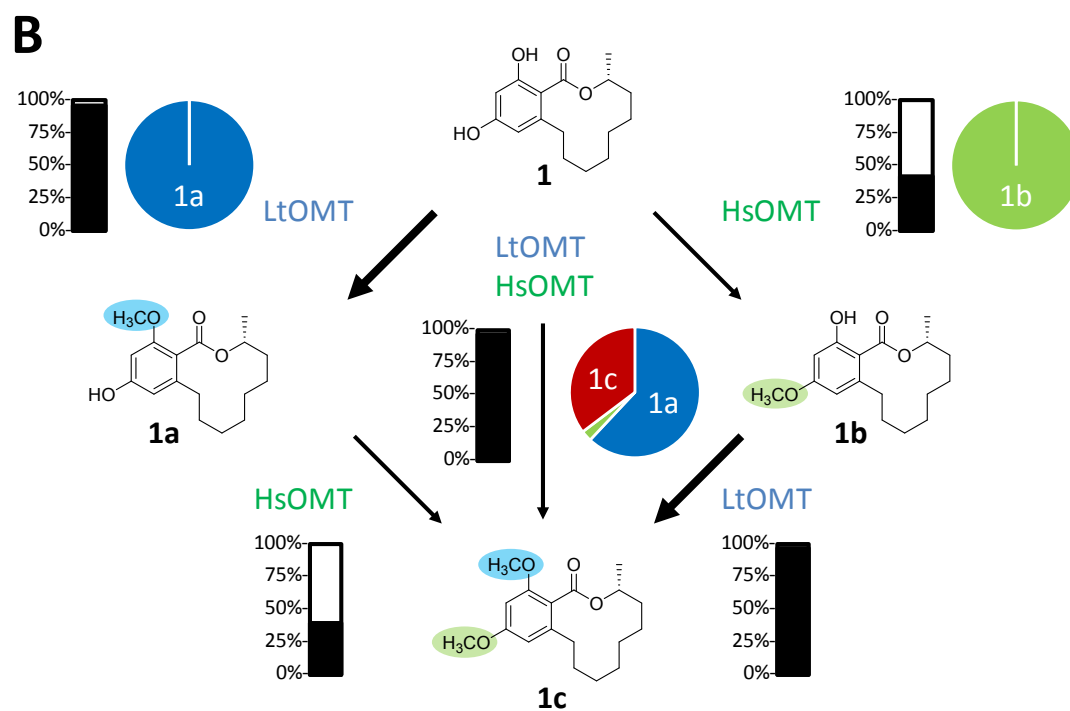

**C**

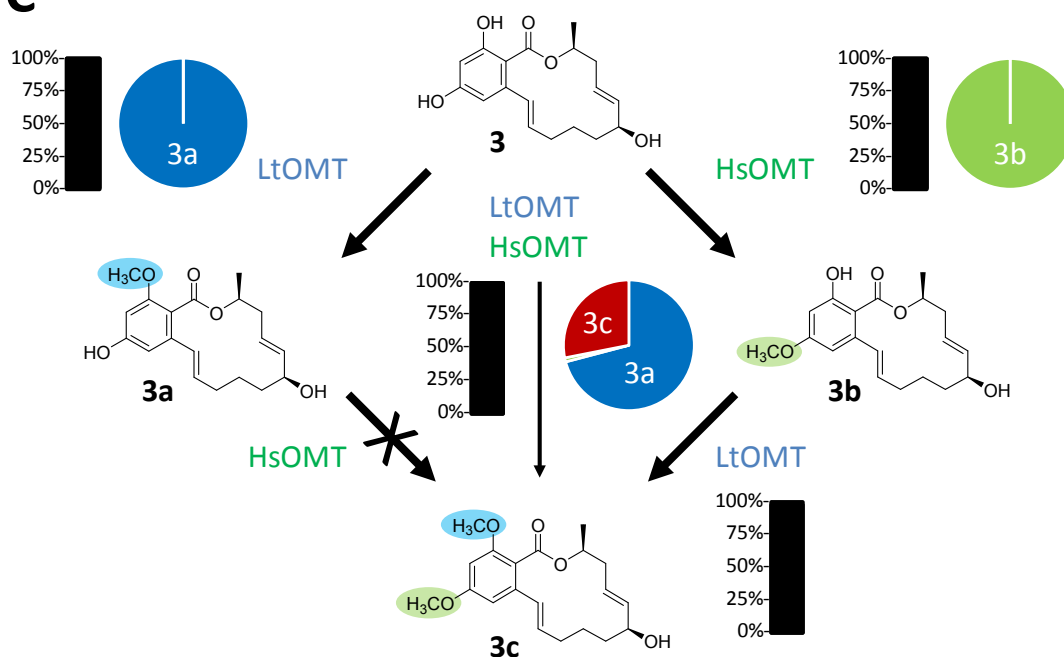

**D**

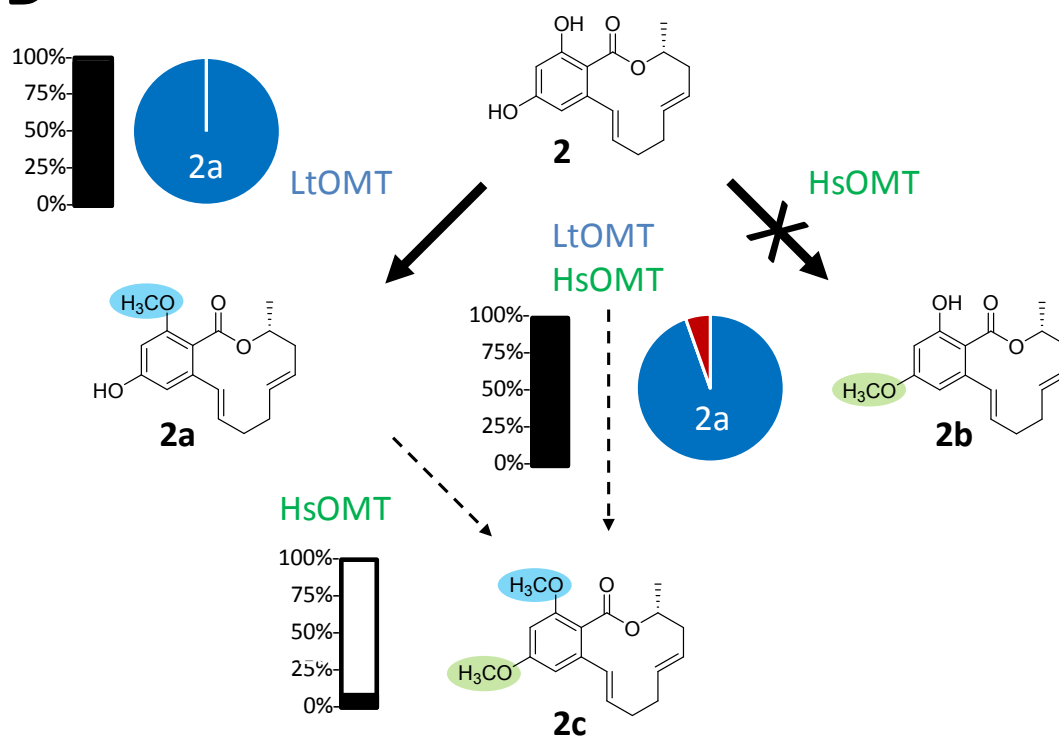

## Figure S2. Influence of preexisting methylation on the activities of LtOMT and HsOMT.

Unmethylated compounds were fed to cultures of *Saccharomyces cerevisiae* BJ5464-NpgA co-expressing LtOMT and HsOMT, or LtOMT and HsOMT separately. *o*-Methoxy or *p*-methoxy compounds were fed to cultures of *Saccharomyces cerevisiae* BJ5464-NpgA expressing HsOMT or LtOMT separately. *Bars* show the overall conversion percentage of the indicated substrate into all corresponding methylated products. *Pie charts* show the distribution of *O*-methylated product congeners (Yields of the individual products divided by the total yield of all products, multiplied by 100). See Table S3 for tabulated percent conversion values as the mean  $\pm$  SD from three independent experiments of three replicates each (n=9). **A.** LCL (**6**) is converted at moderate efficiency to **6a** by LtOMT and to **6b** by HsOMT, with small additional amounts of the *o,p*-dimethoxy product **6c** also forming when both LtOMT and HsOMT are present. *O*-methylated congeners **6a** or **6b** can be converted at low efficiency to **6c** by HsOMT or LtOMT, respectively. **B.** LtOMT converts DLD (**1**) to the *O*-methylated product **1a** efficiently. Conversion of DLD (**1**) by HsOMT to **1b** occurs at moderate levels. In the presence of both LtOMT and HsOMT, **1a** and **1c** are the main products. The *o,p*-dimethoxy congener **1c** can also be produced by HsOMT from **1a** at moderate efficiency, and from **1b** by LtOMT at high efficiency. **C.** DHZ (**3**) is efficiently converted to **3a** or **3b** by LtOMT or HsOMT, respectively. In the presence of both enzymes, **3a** and **3c** are the main products. The *o*-methoxy congener **3a** is not a substrate for HsOMT, while **3b** is efficiently converted to **3c** by LtOMT. **D.** RDN (**2**) is efficiently converted to **2a** by LtOMT. However, RDN (**2**) is not a substrate for HsOMT, thus the *p*-methoxy congener **2b** is not produced. In the presence of both enzymes, **2a** forms efficiently.

A small amount of the *o,p*-dimethoxy product **2c** is also produced, since the *o*-methoxy congener **2a** is a marginal substrate for HsOMT.”

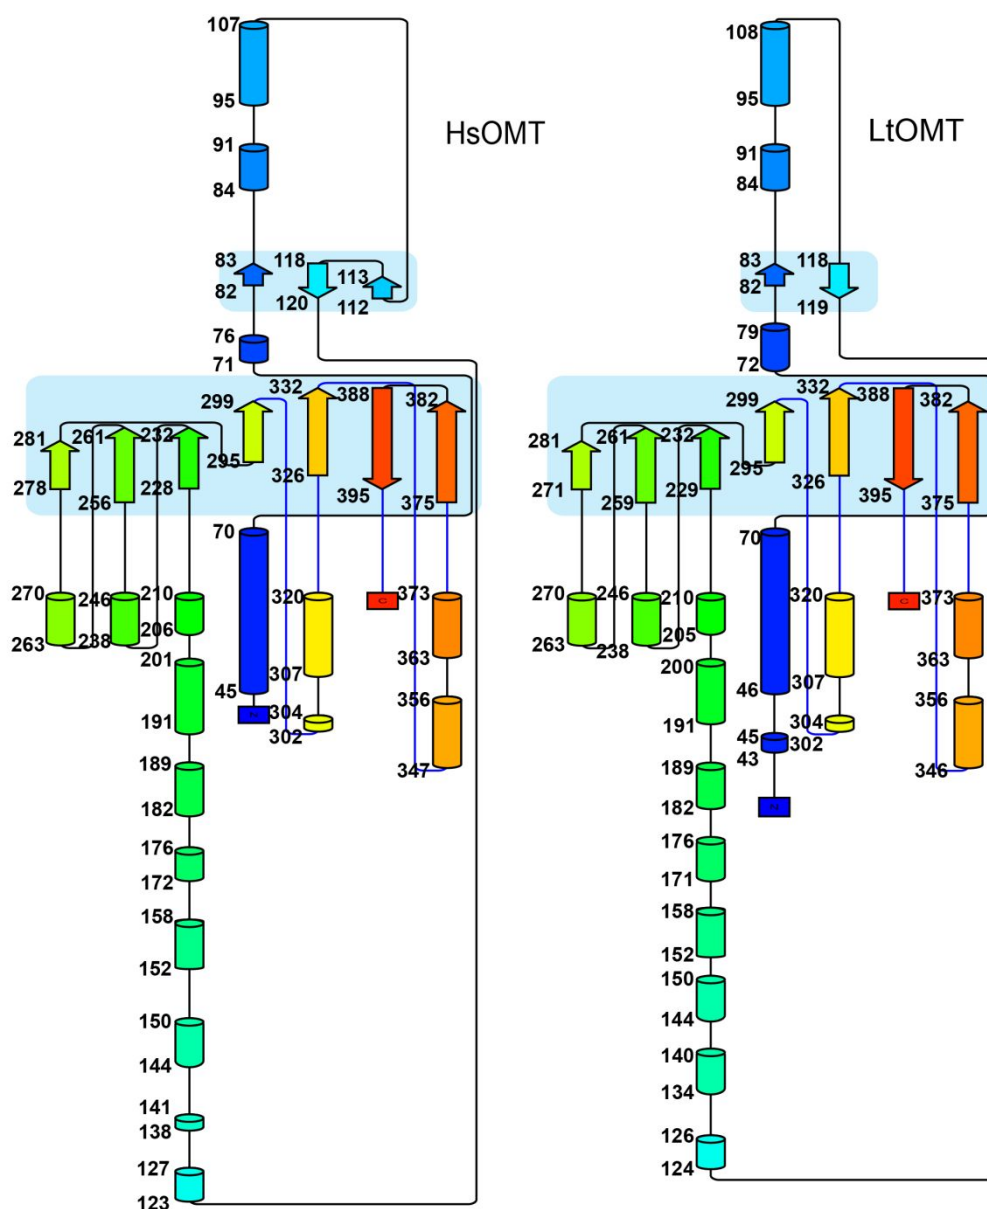

**Figure S3. Topology of LtOMT and HsOMT.**

$\beta$ -strands are shown as *arrows*,  $\alpha$ -helices indicated as *cylinders*,  $\beta$ -sheets are highlighted by *blue boxes*. Structural elements are colored as a gradient starting at the *N*-terminus (*dark blue*) and ending at the *C*-terminus (*red*). Amino acid residues at the start and at the end of each structural element are labeled by their residue number. The figure was generated using the Pro-Origami server (<http://munk.csse.unimelb.edu.au/pro-origami/>).

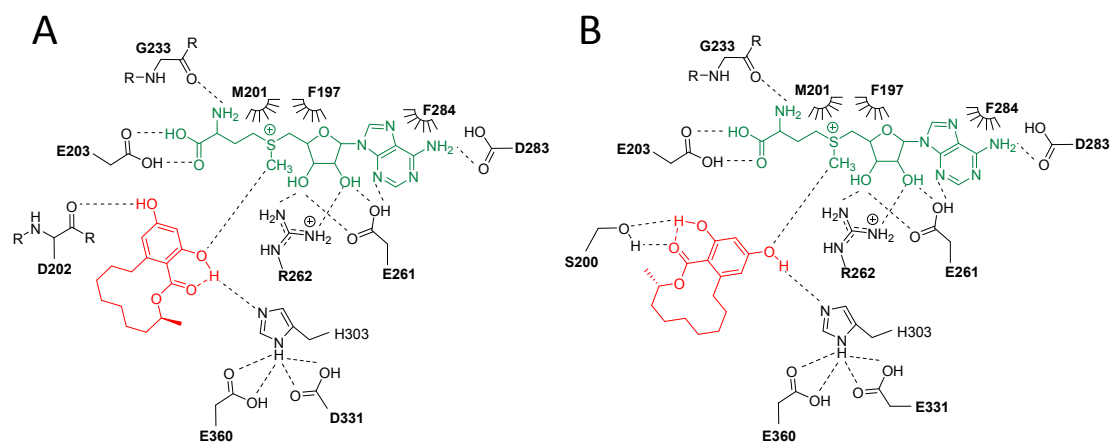

**Figure S4. Docking models of DLD and SAM for LtOMT and HsOMT.**

Predicted polar and hydrophobic interactions for *S*-adenosyl-methionine (SAM, in *green*), and polar interactions for DLD 1 (in *red*), with **A.** LtOMT, and **B.** HsOMT.

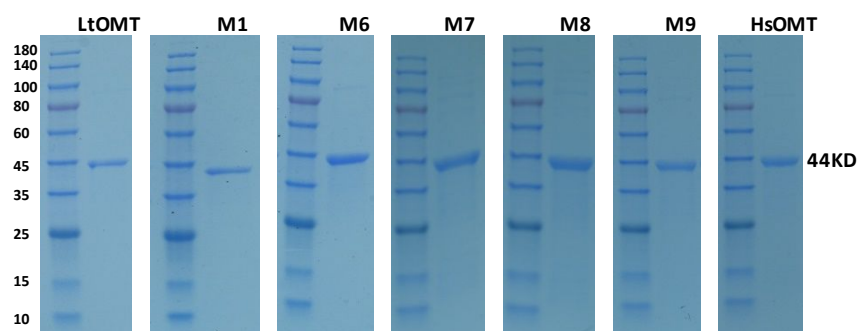

**Figure S5. SDS-PAGE analysis of purified methyltransferases.**

Recombinant methyltransferase enzymes were expressed as soluble ~44 kDa His-tagged proteins in *E. coli* Arctic Express (DE3) RIL cells and purified to substantial homogeneity as described in the SI Materials and Methods.



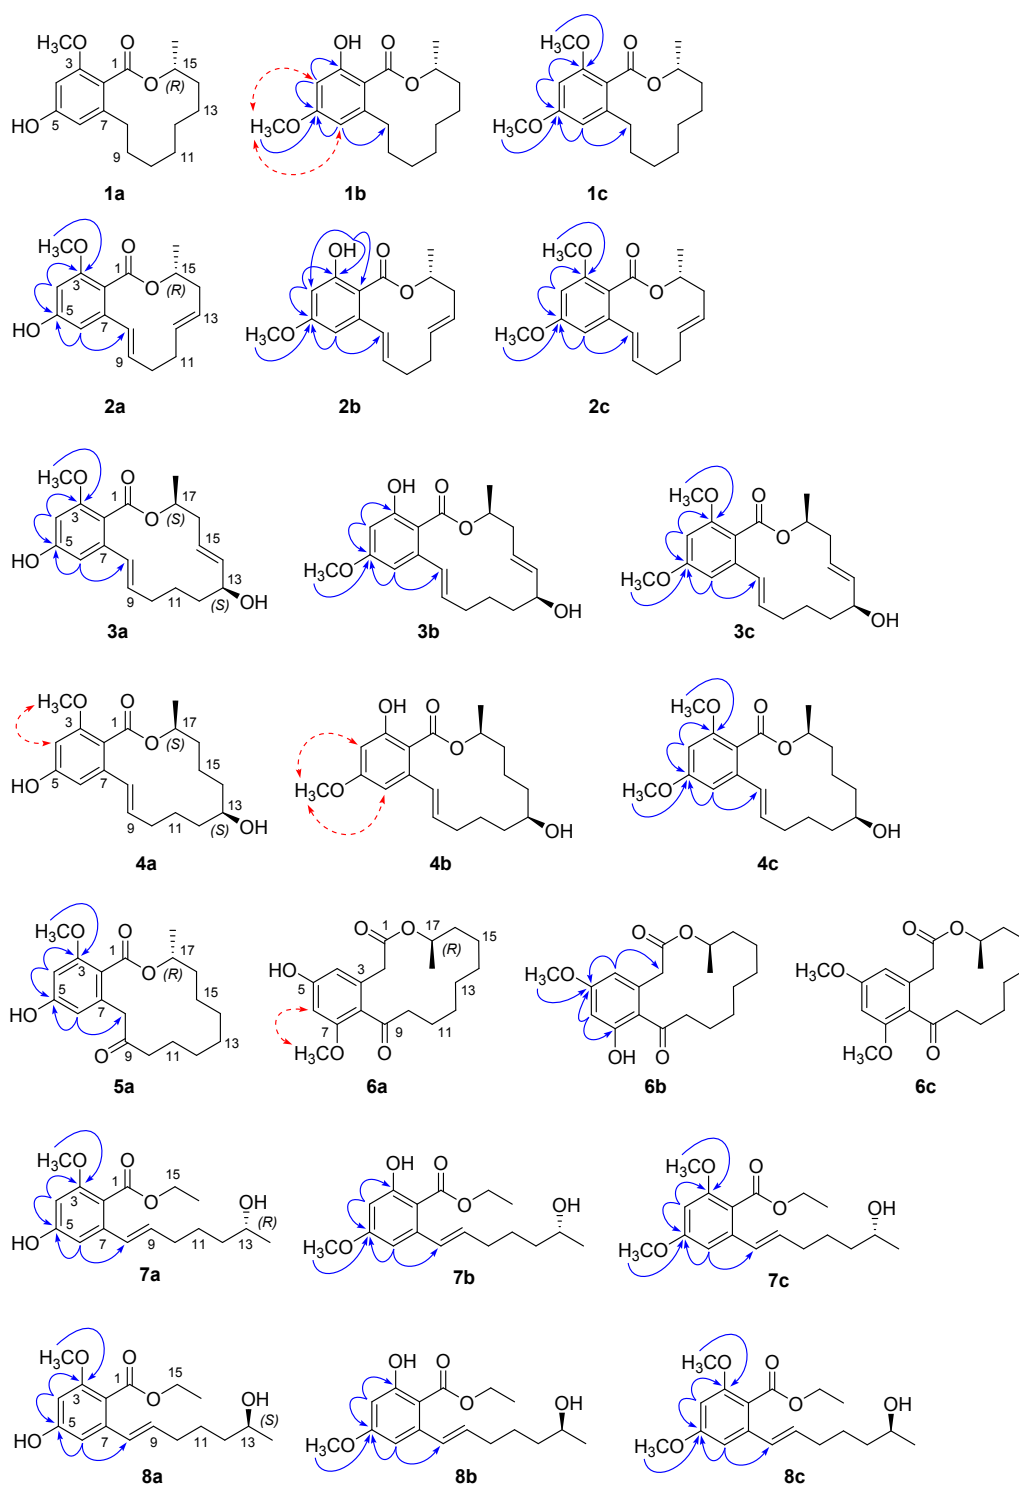

**Figure S6. Chemical structures and key HMBC ( $\rightarrow$ ) and NOE ( $\dashrightarrow$ ) correlations of isolated compounds.**

**Figure S7. NMR spectra.**

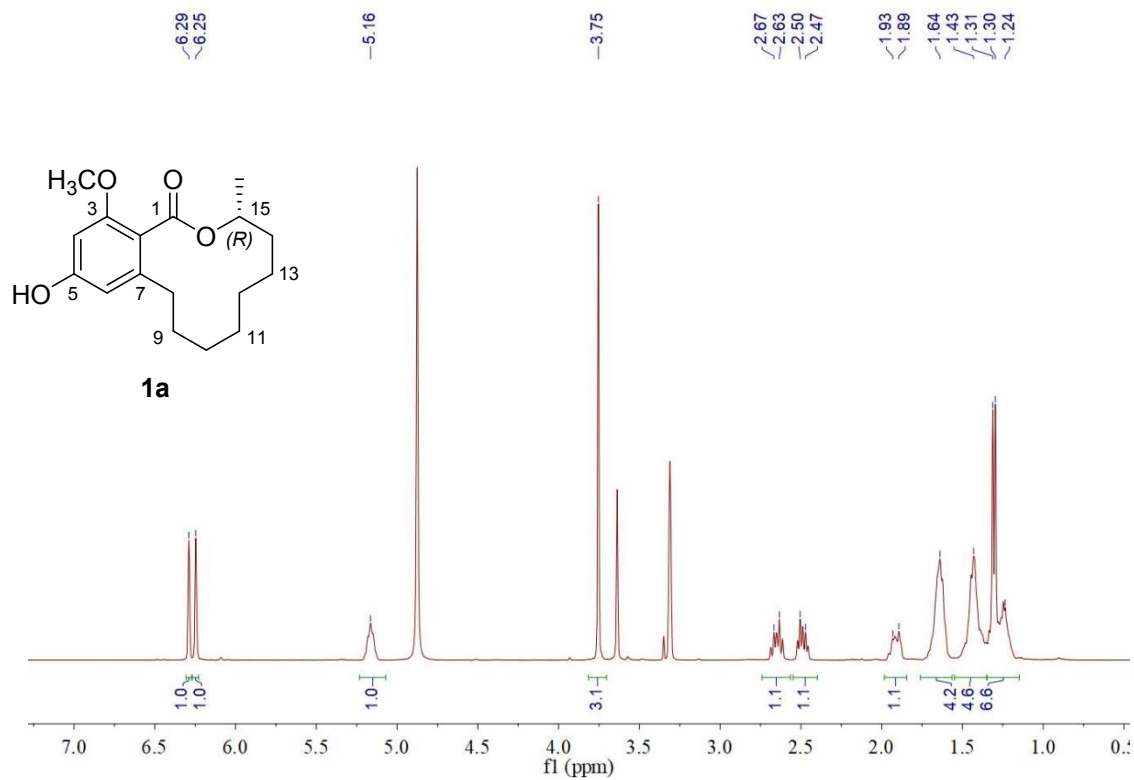

**Figure S7.1. <sup>1</sup>H NMR spectrum of compound 1a in methanol-*d*<sub>4</sub>**

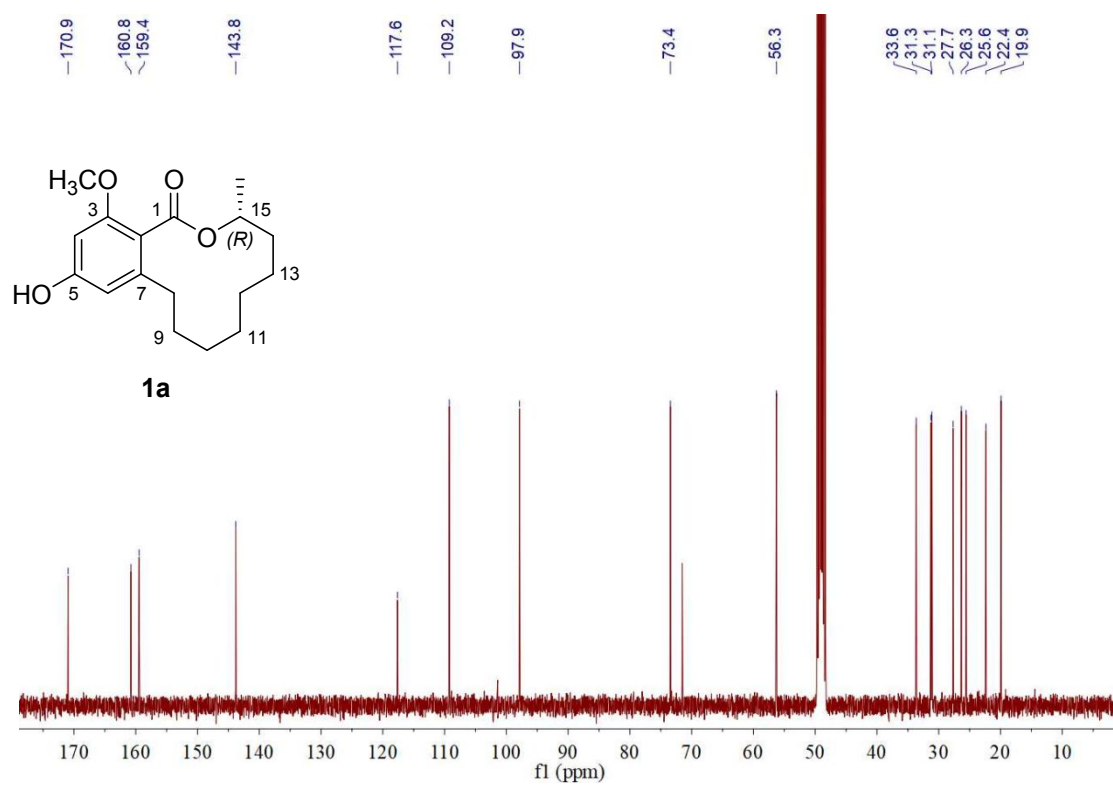

**Figure S7.2.** <sup>13</sup>C NMR spectrum of compound **1a** in methanol-*d*<sub>4</sub>

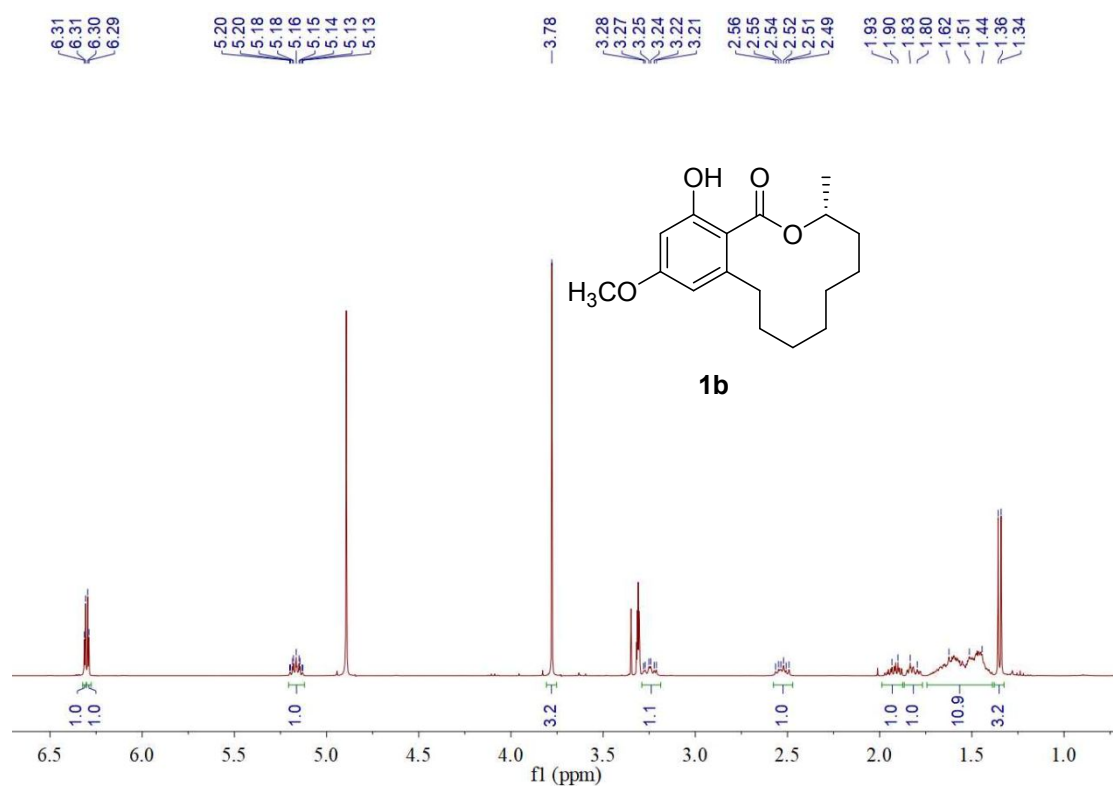

**Figure S7.3.** <sup>1</sup>H NMR spectrum of compound **1b** in methanol-*d*<sub>4</sub>

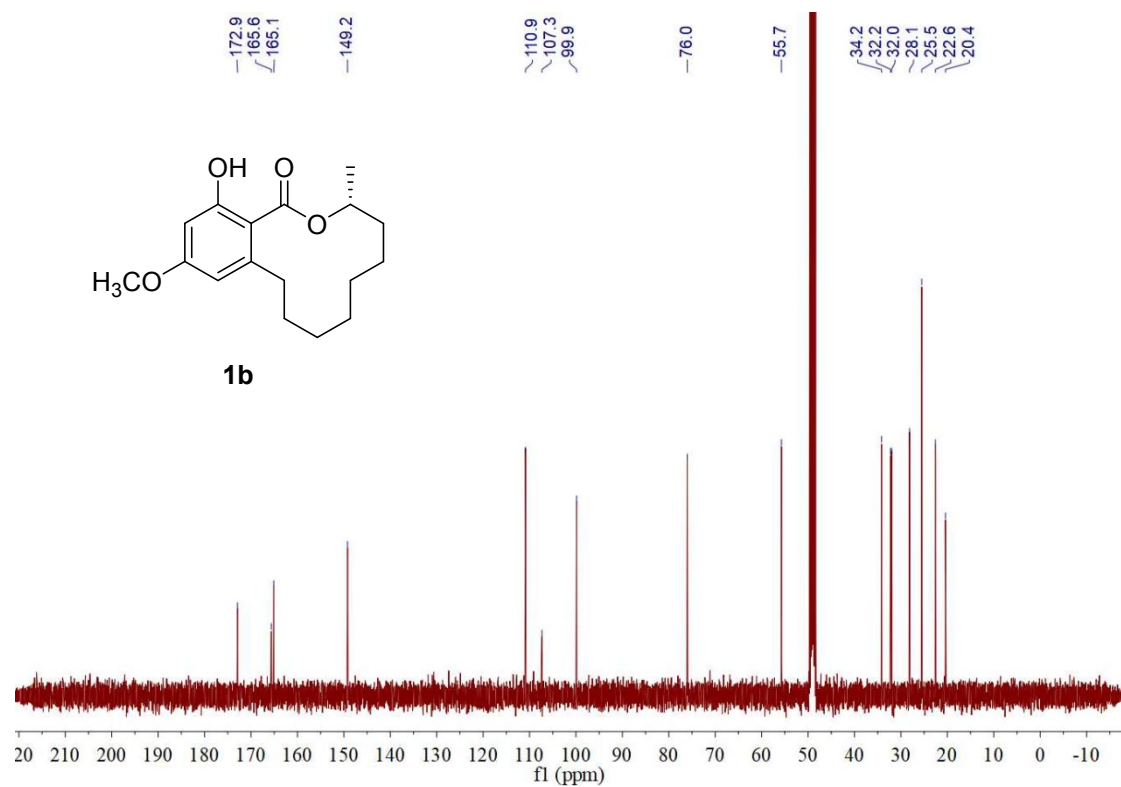

**Figure S7.4.**  $^{13}\text{C}$  NMR spectrum of compound **1b** in methanol- $d_4$

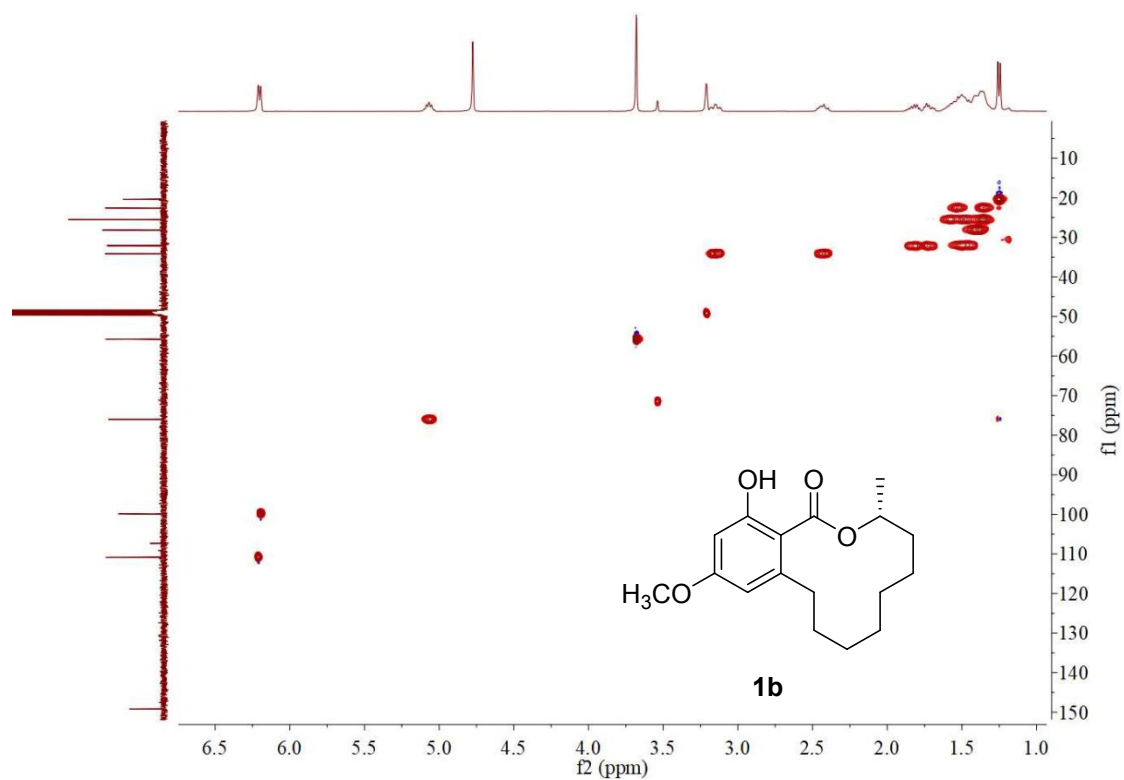

**Figure S7.5.** HSQC spectrum of compound **1b** in methanol- $d_4$

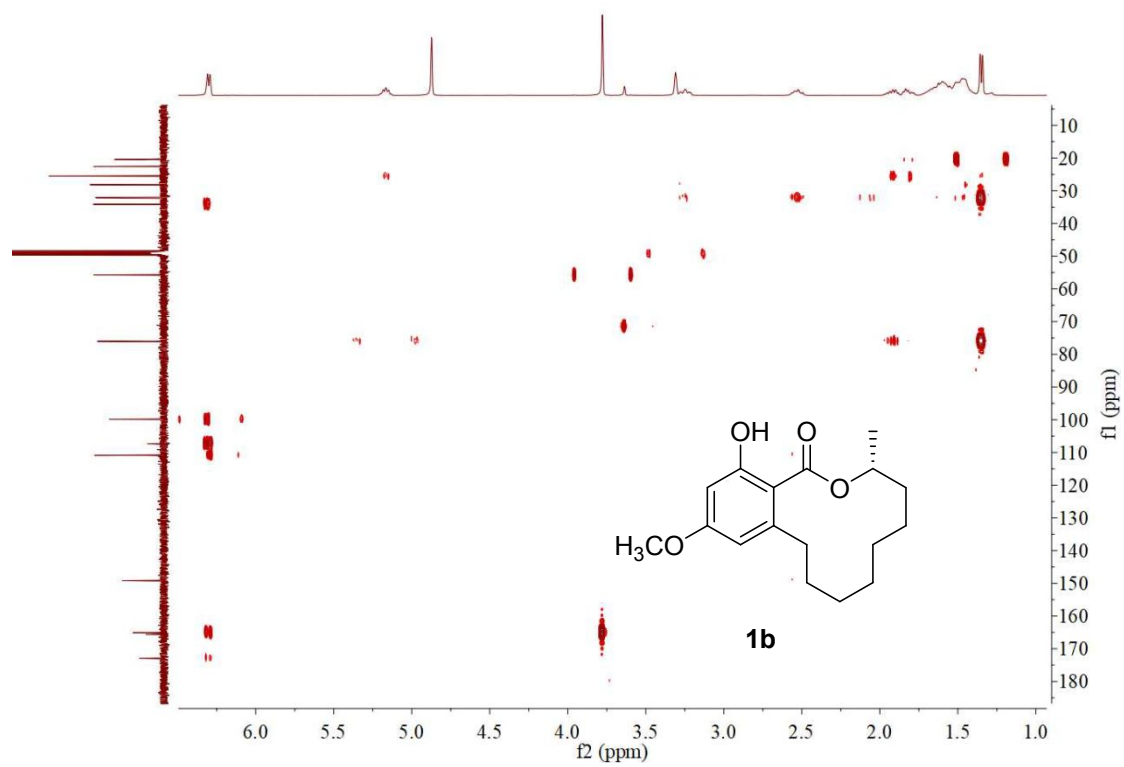

**Figure S7.6.** HMBC spectrum of compound **1b** in methanol- $d_4$

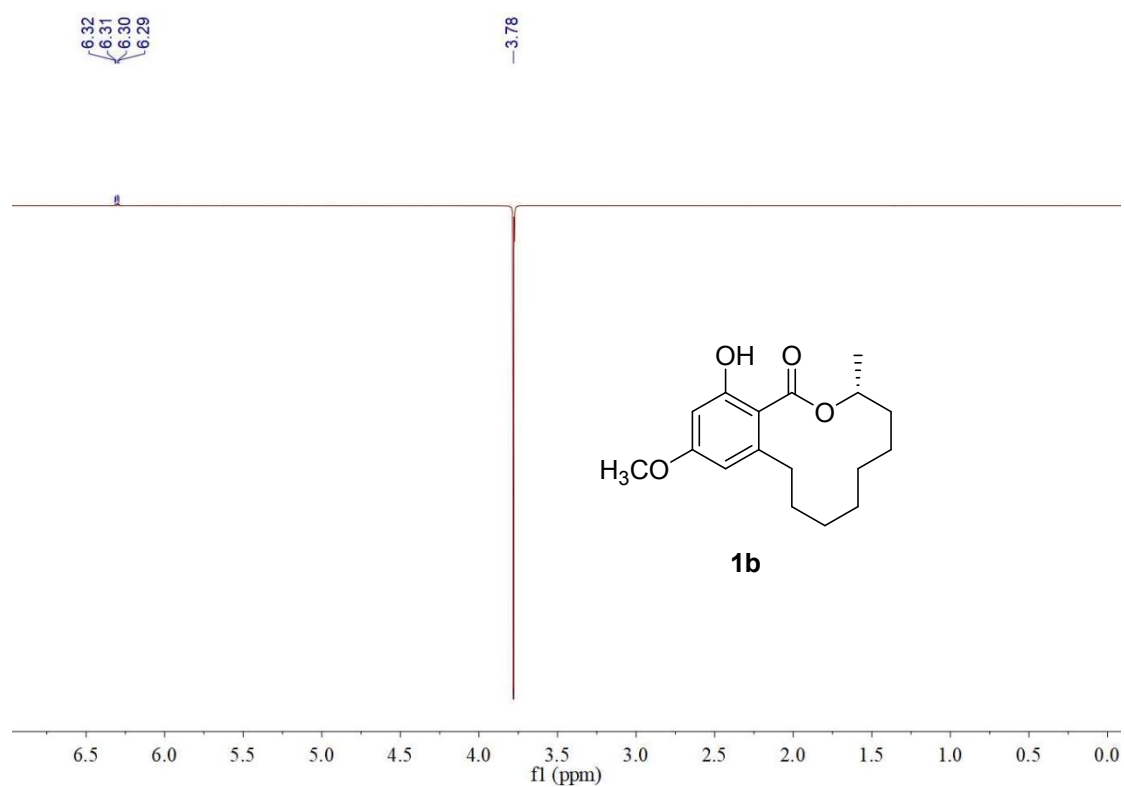

**Figure S7.7.** 1D NOESY spectrum of compound **1b** in methanol-*d*<sub>4</sub>



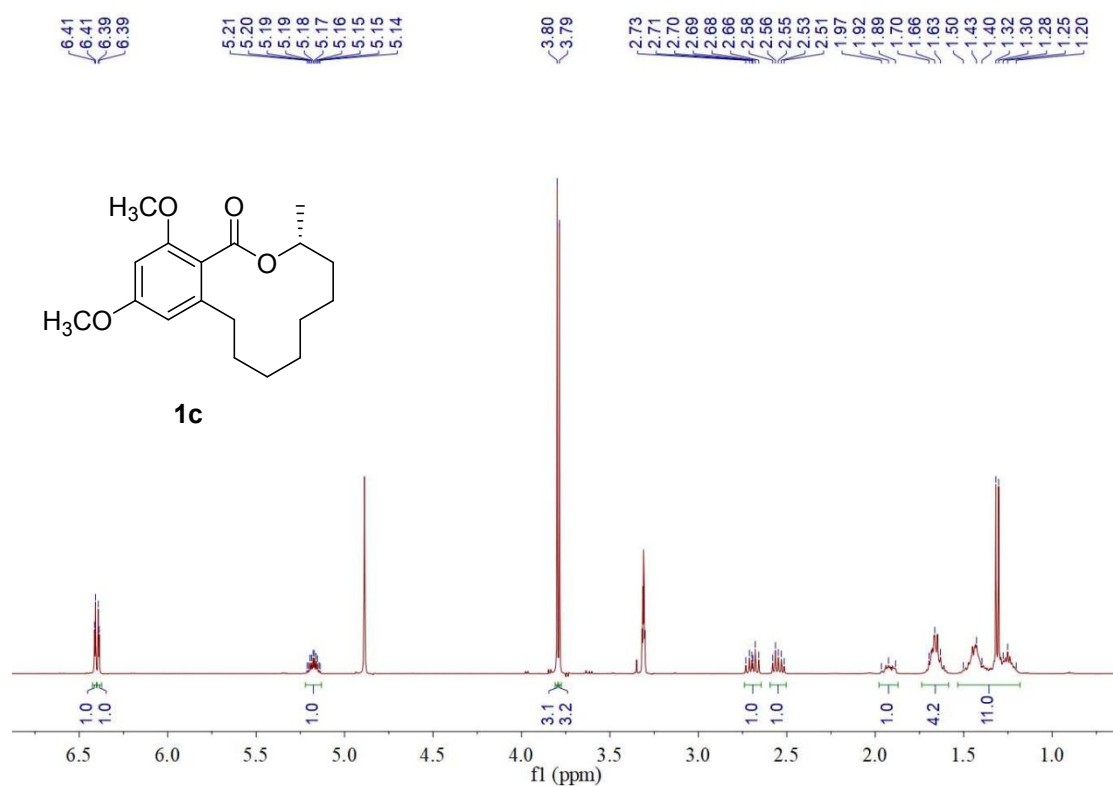

**Figure S7.8.** <sup>1</sup>H NMR spectrum of compound **1c** in methanol-*d*<sub>4</sub>

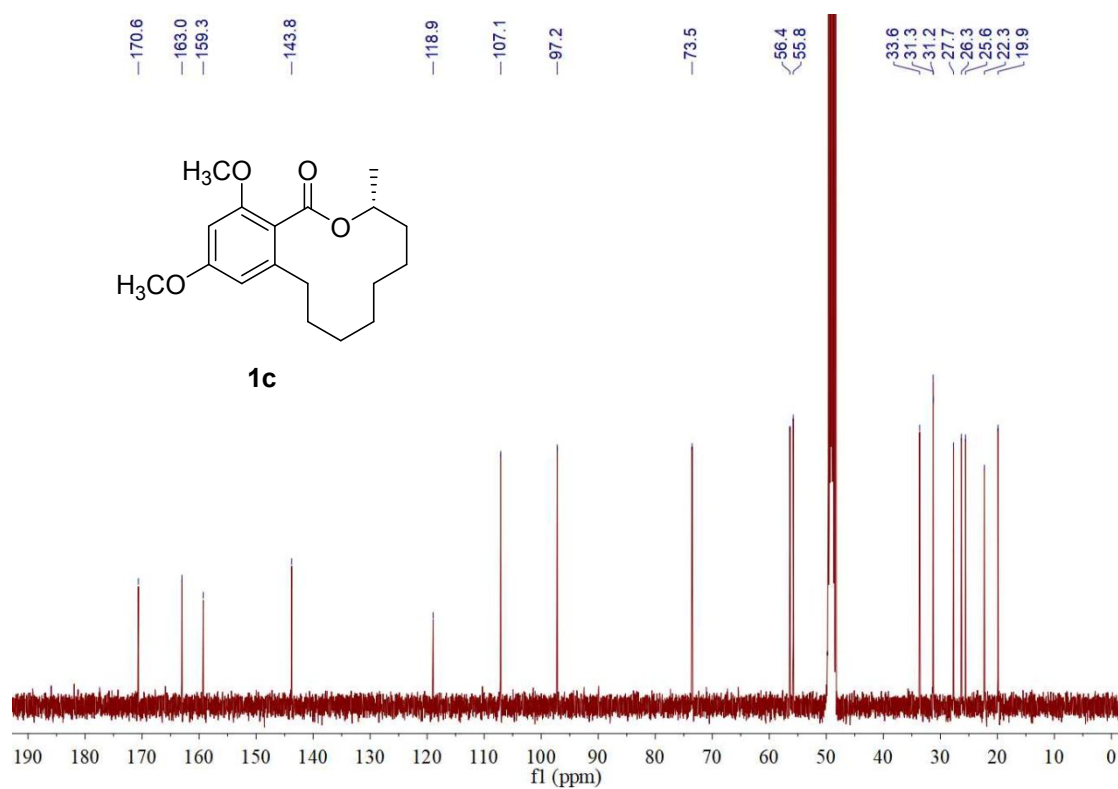

**Figure S7.9.** <sup>13</sup>C NMR spectrum of compound **1c** in methanol-*d*<sub>4</sub>

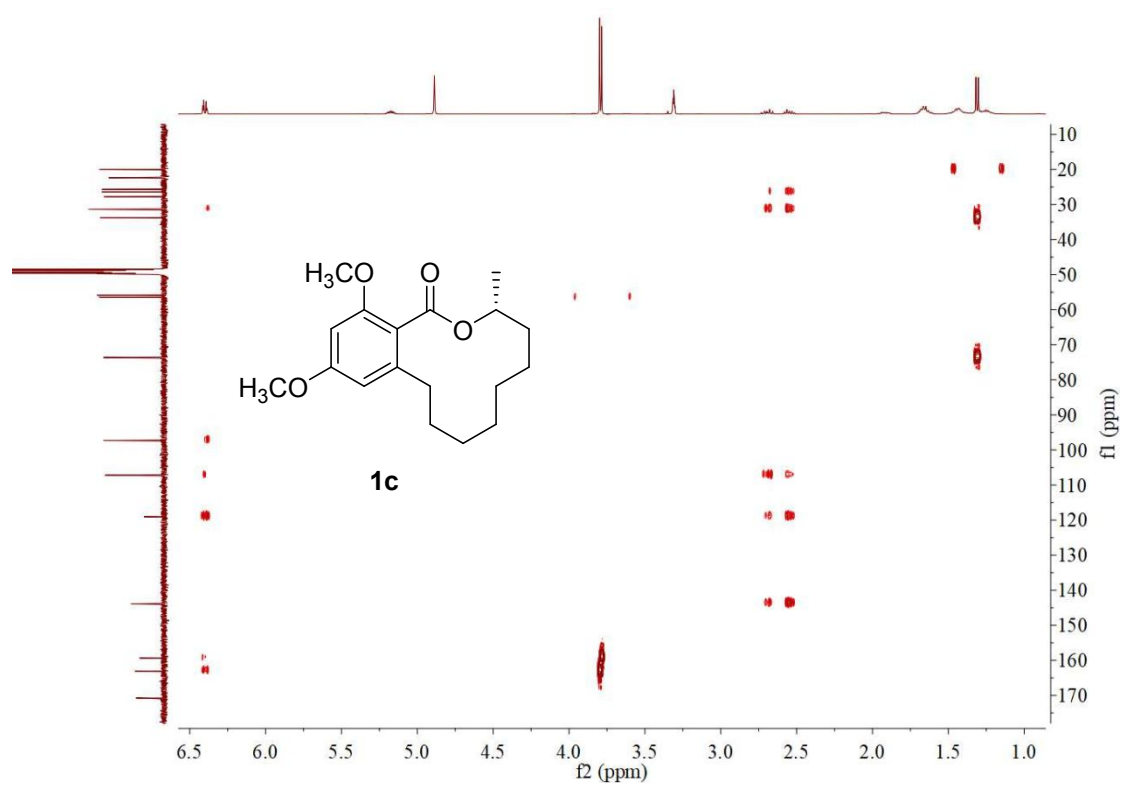

**Figure S7.10.** HMBC spectrum of compound **1c** in methanol- $d_4$

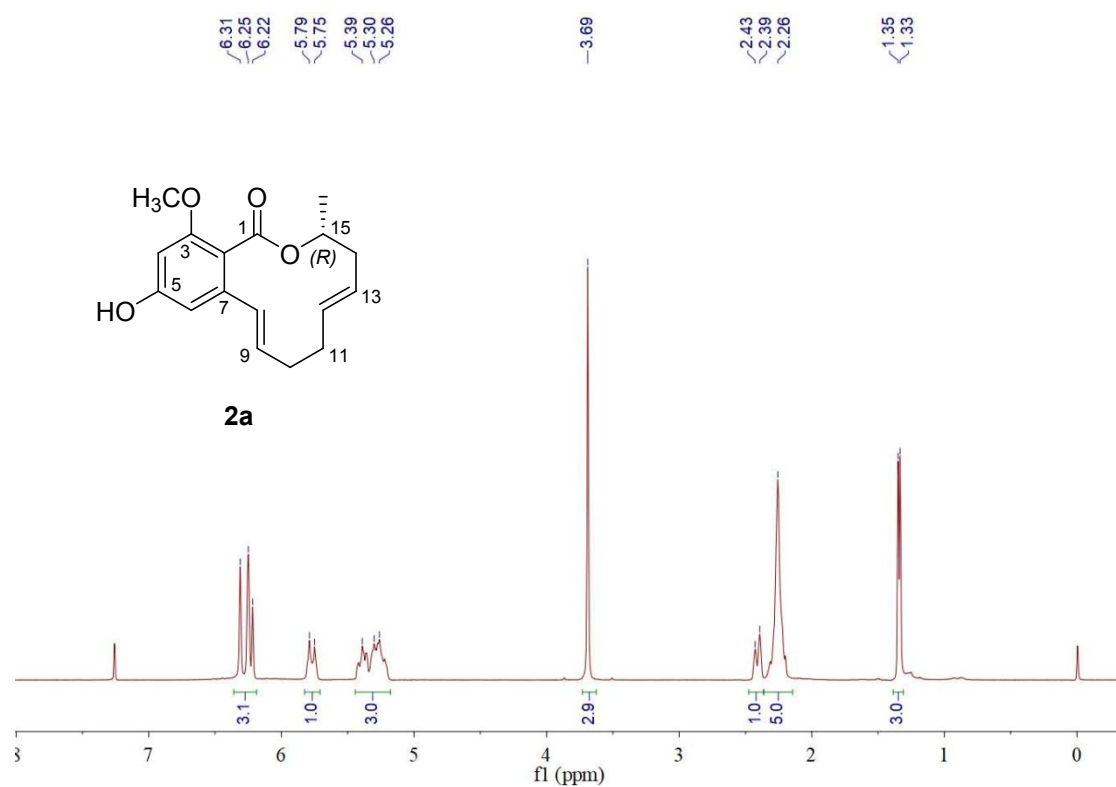

**Figure S7.11.** <sup>1</sup>H NMR spectrum of compound **2a** in CDCl<sub>3</sub>

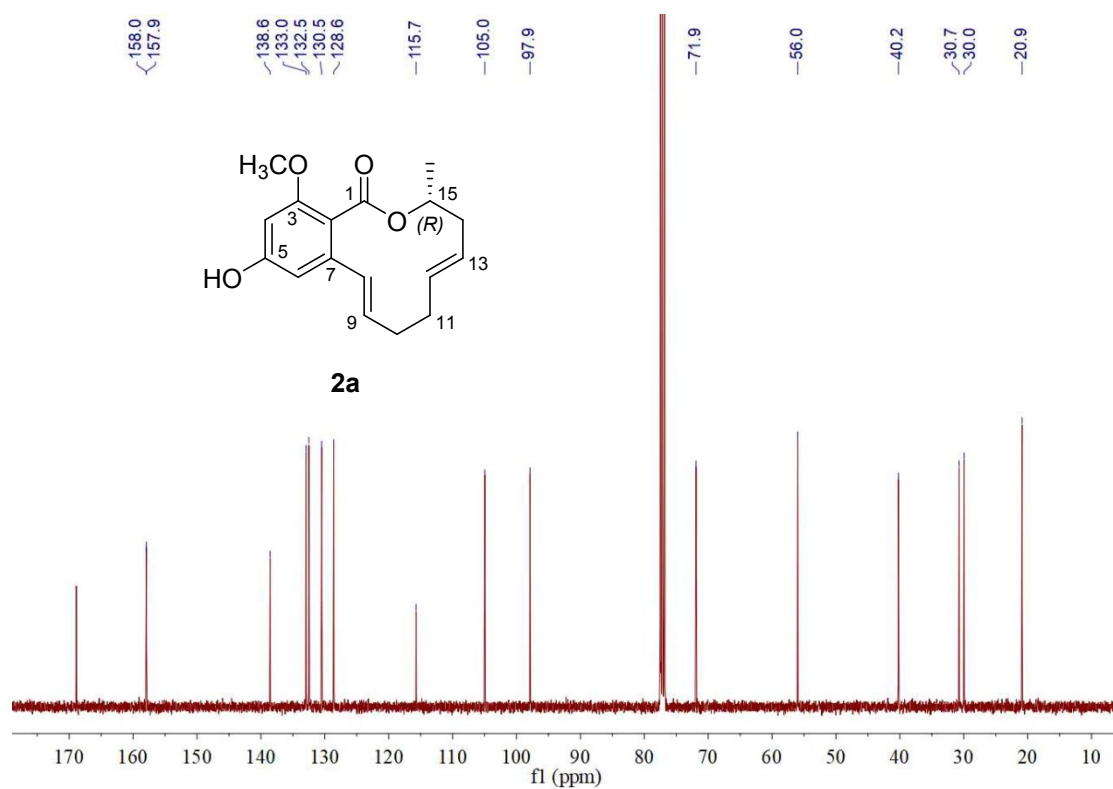

**Figure S7.12.** <sup>13</sup>C NMR spectrum of compound **2a** in CDCl<sub>3</sub>

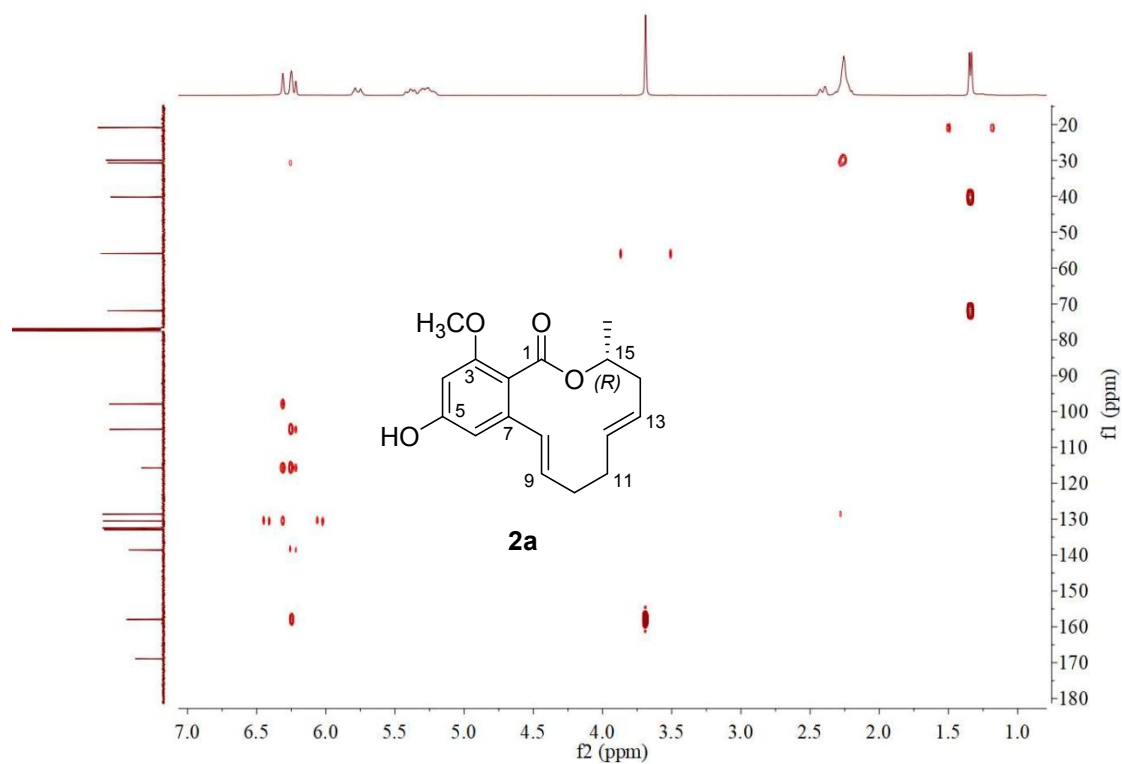

**Figure S7.13.** HMBC spectrum of compound **2a** in  $\text{CDCl}_3$

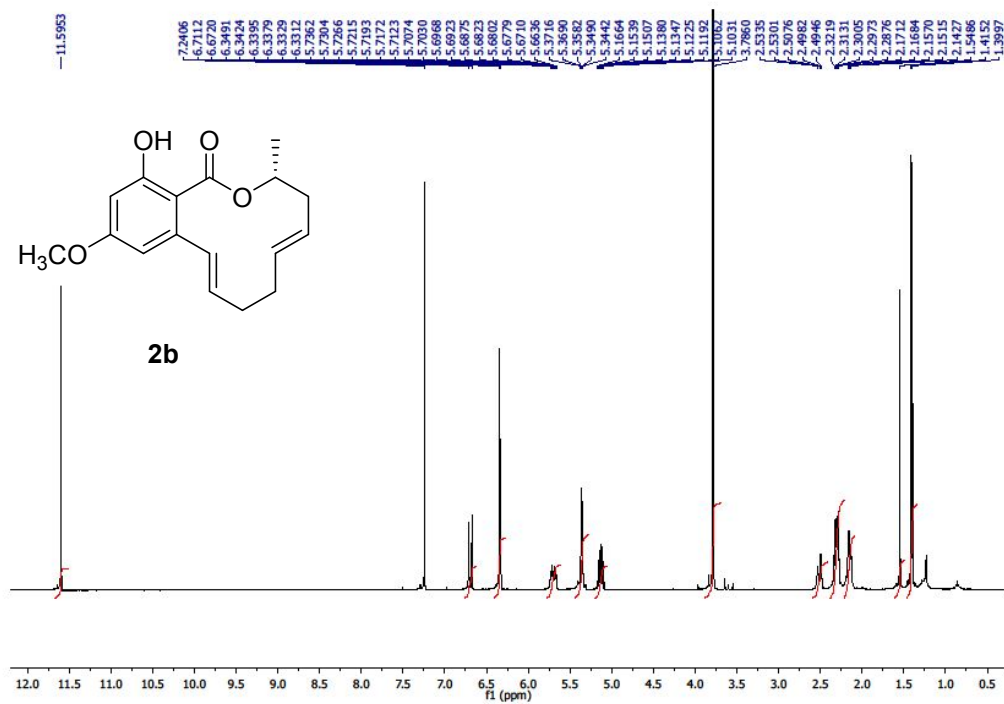

Figure S7.14.  $^1\text{H}$  NMR spectrum of compound **2b** in  $\text{CDCl}_3$

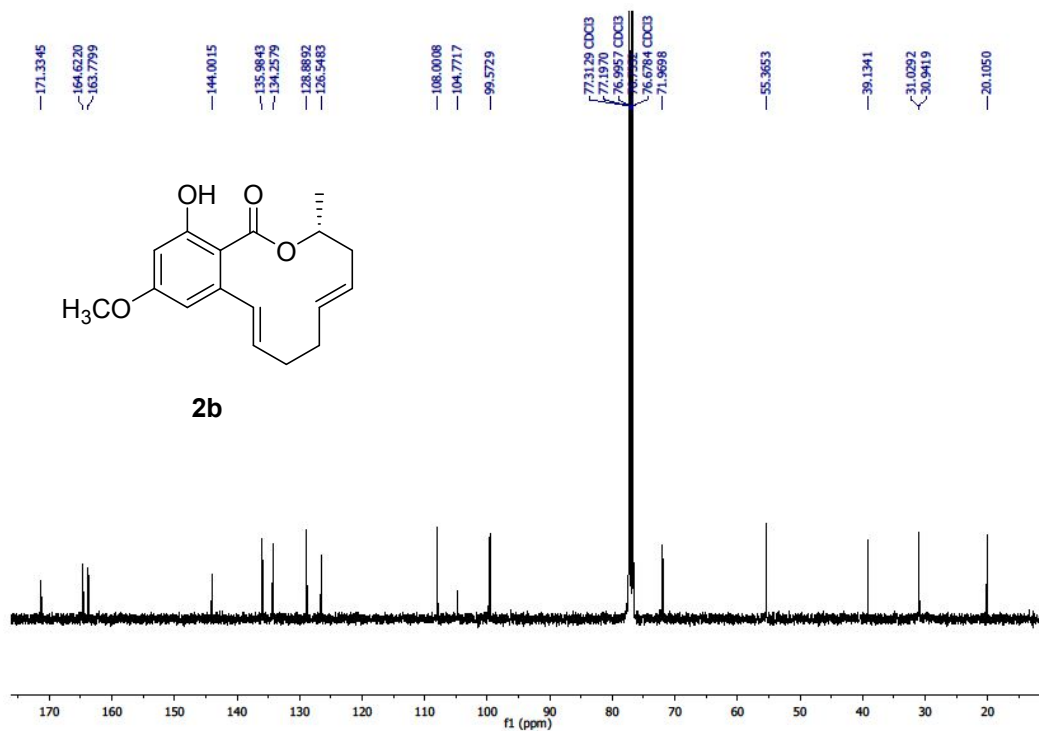

Figure S7.15.  $^{13}\text{C}$  NMR spectrum of compound **2b** in CDCl<sub>3</sub>



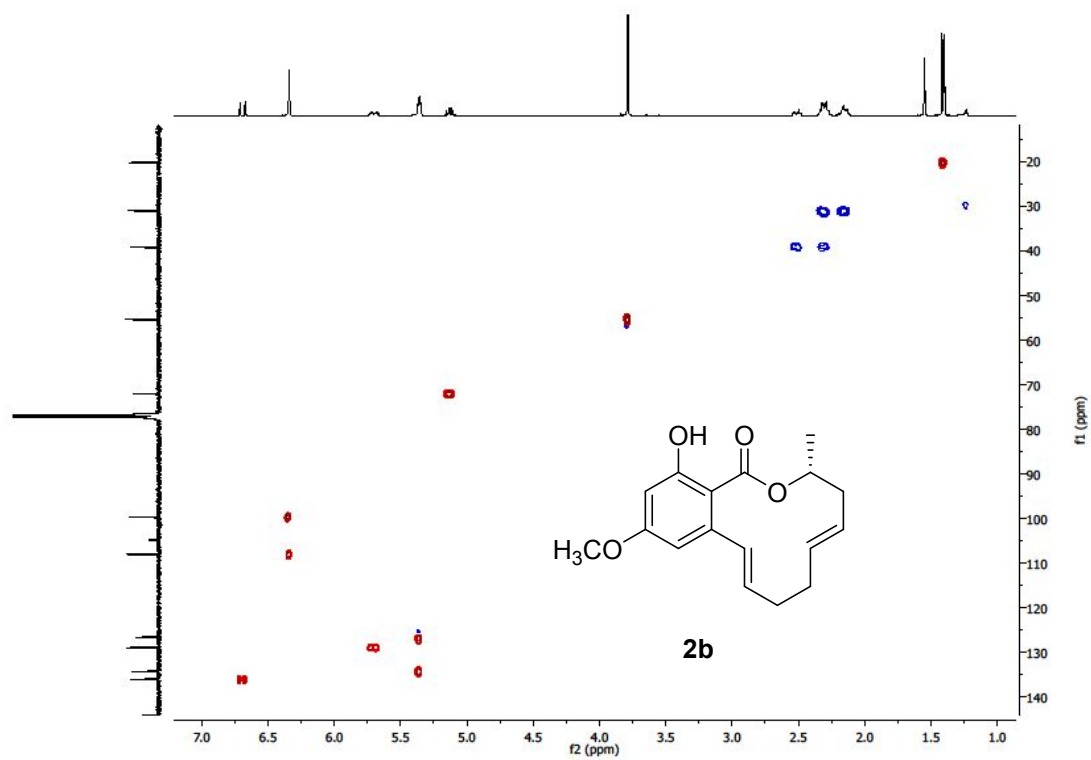

**Figure S7.16.** HSQC spectrum of compound **2b** in  $\text{CDCl}_3$

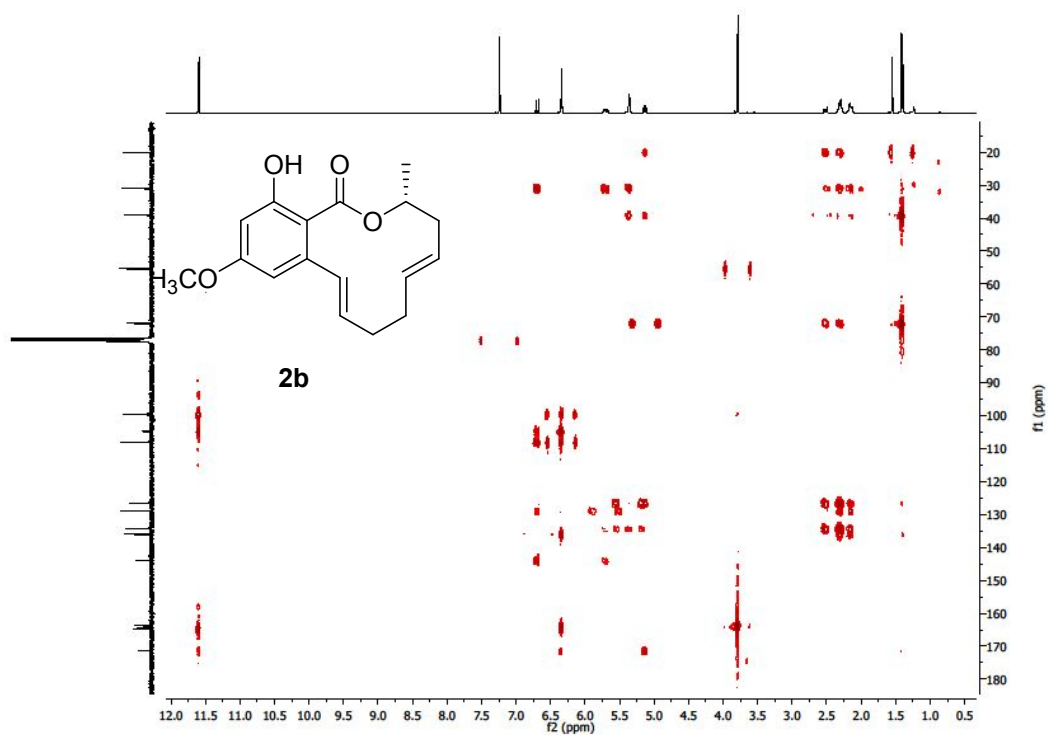

**Figure S7.17.** HMBC spectrum of compound **2b** in  $\text{CDCl}_3$

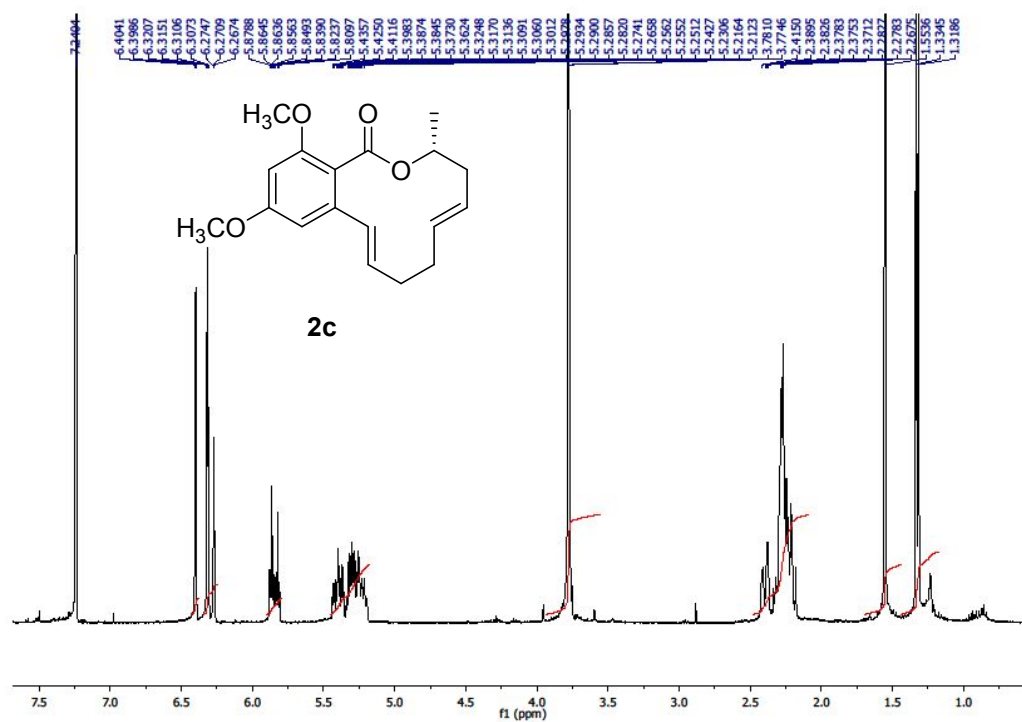

Figure S7.18.  $^1\text{H}$  NMR spectrum of compound 2c in  $\text{CDCl}_3$

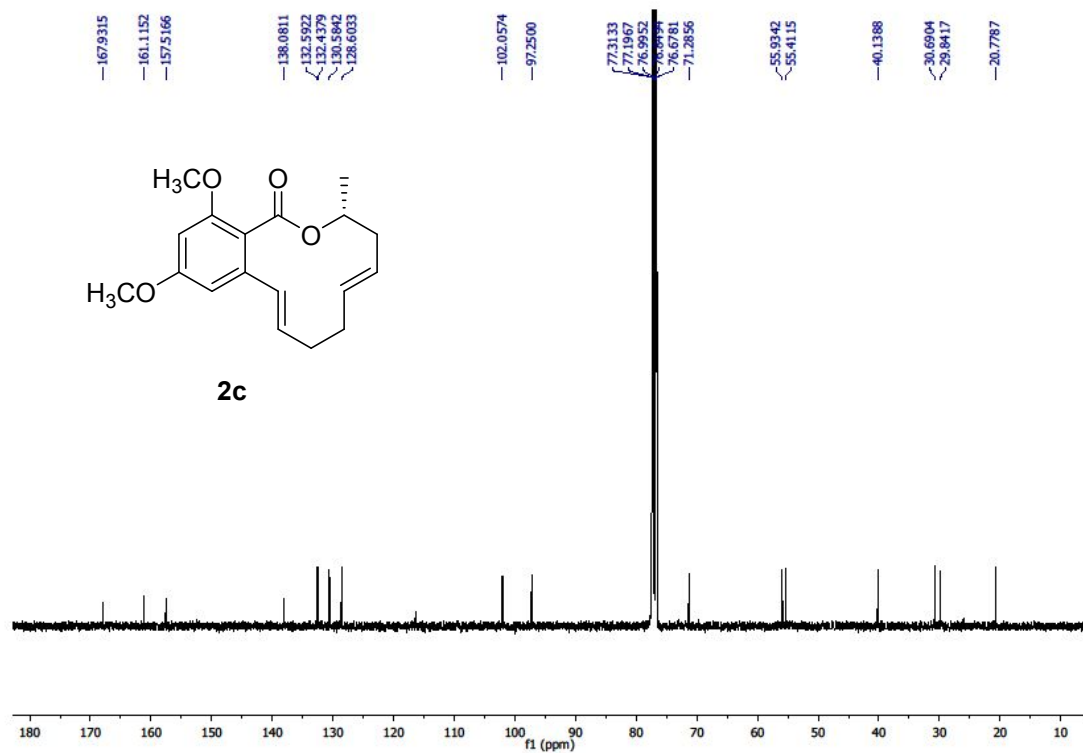

Figure S7.19. <sup>13</sup>C NMR spectrum of compound **2c** in CDCl<sub>3</sub>

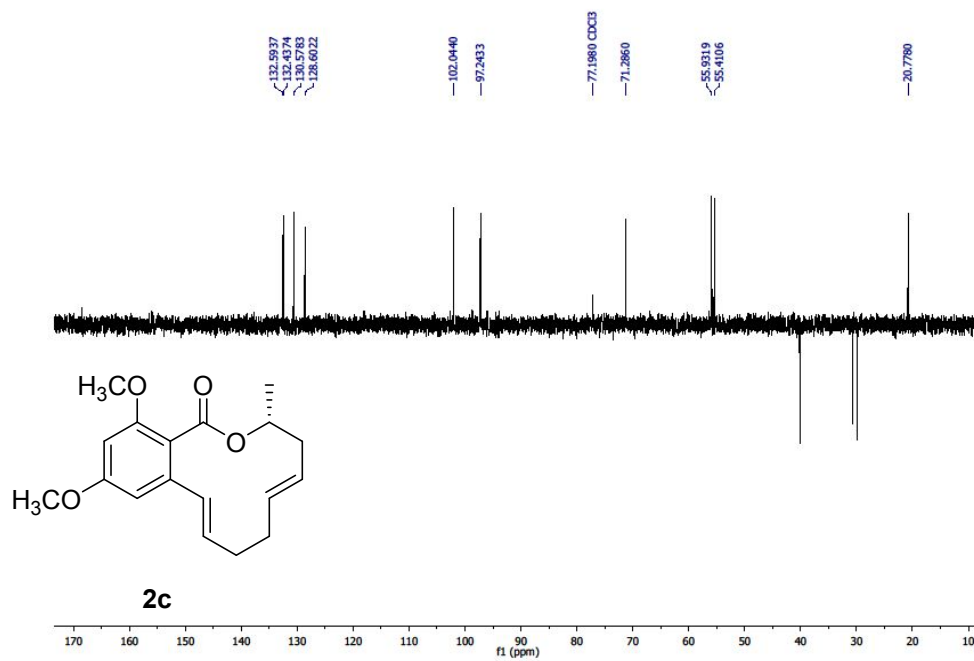

**Figure S7.20.** DEPT 135 spectrum of compound **2c** in  $\text{CDCl}_3$

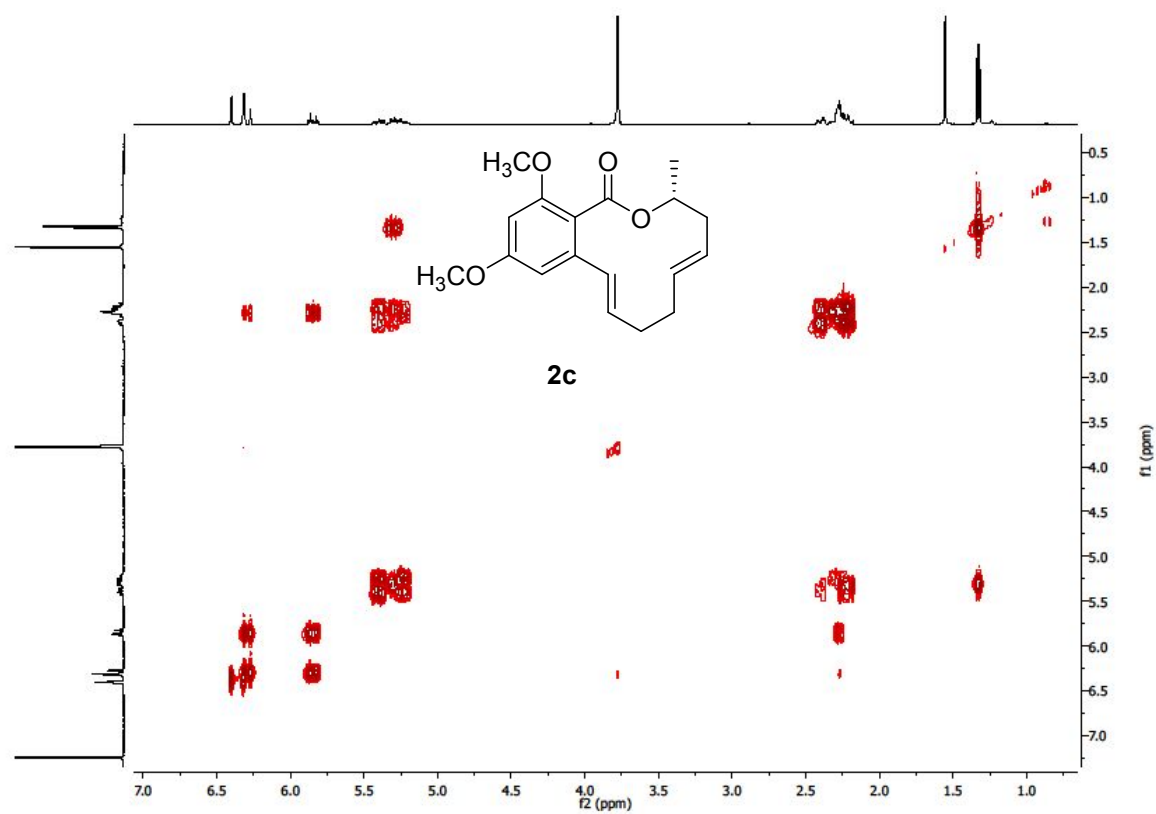

**Figure S7.21.**  $^1\text{H}$ - $^1\text{H}$  COSY spectrum of compound **2c** in  $\text{CDCl}_3$

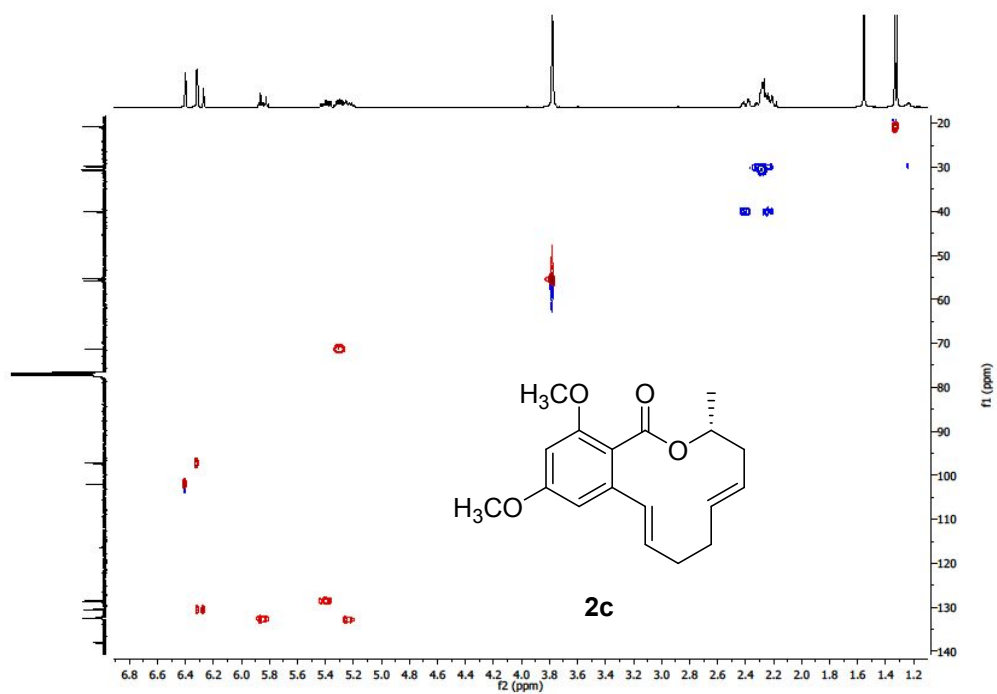

**Figure S7.22.** HSQC spectrum of compound **2c** in  $\text{CDCl}_3$

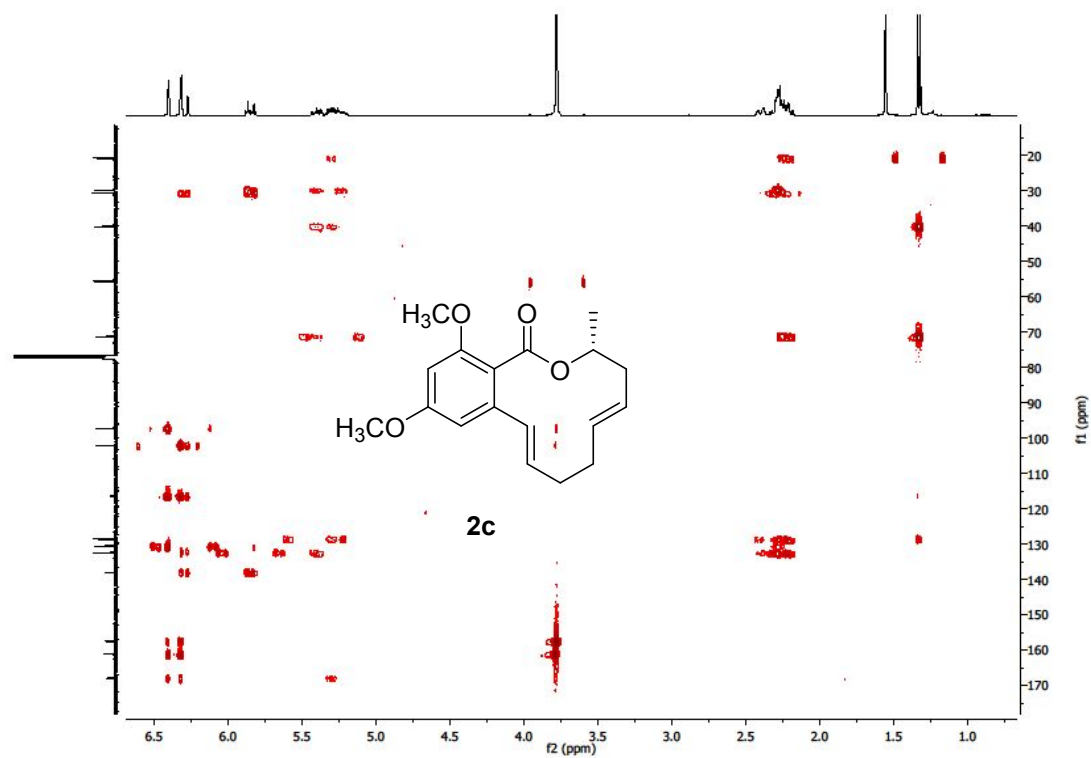

**Figure S7.23.** HMBC spectrum of compound **2c** in  $\text{CDCl}_3$



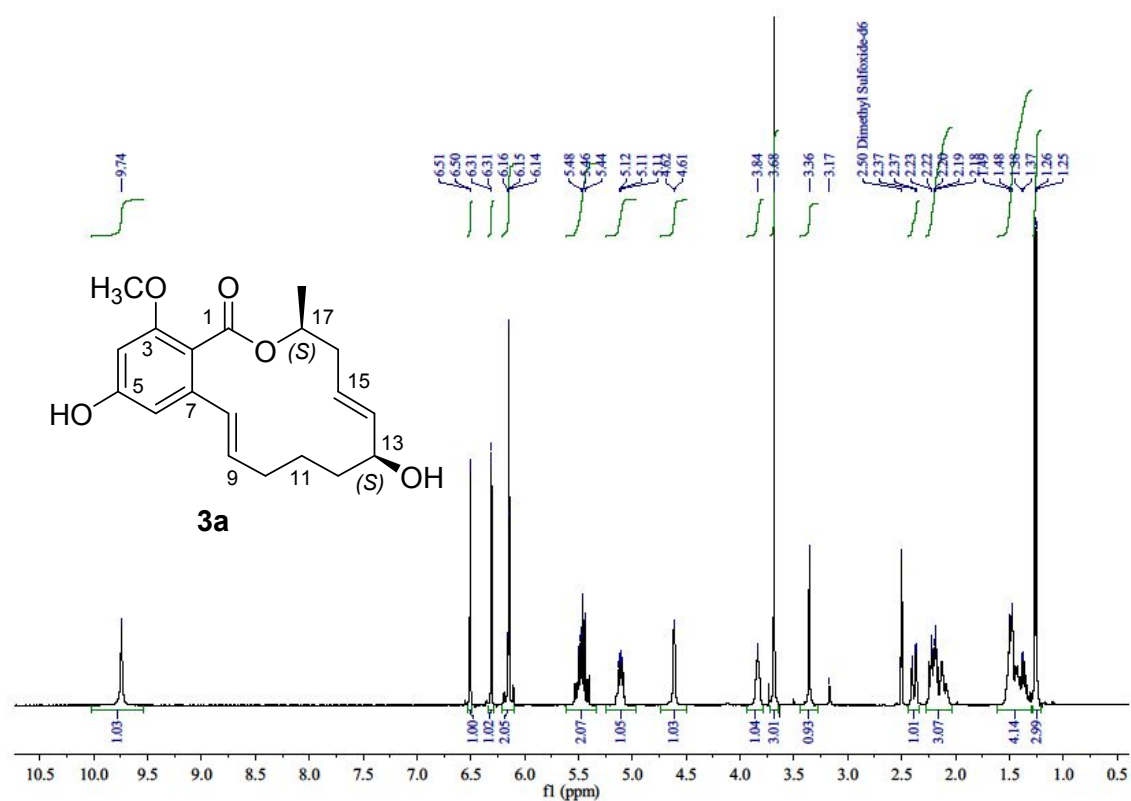

Figure S7.24.  $^1\text{H}$  NMR spectrum of compound **3a** in  $\text{DMSO}-d_6$

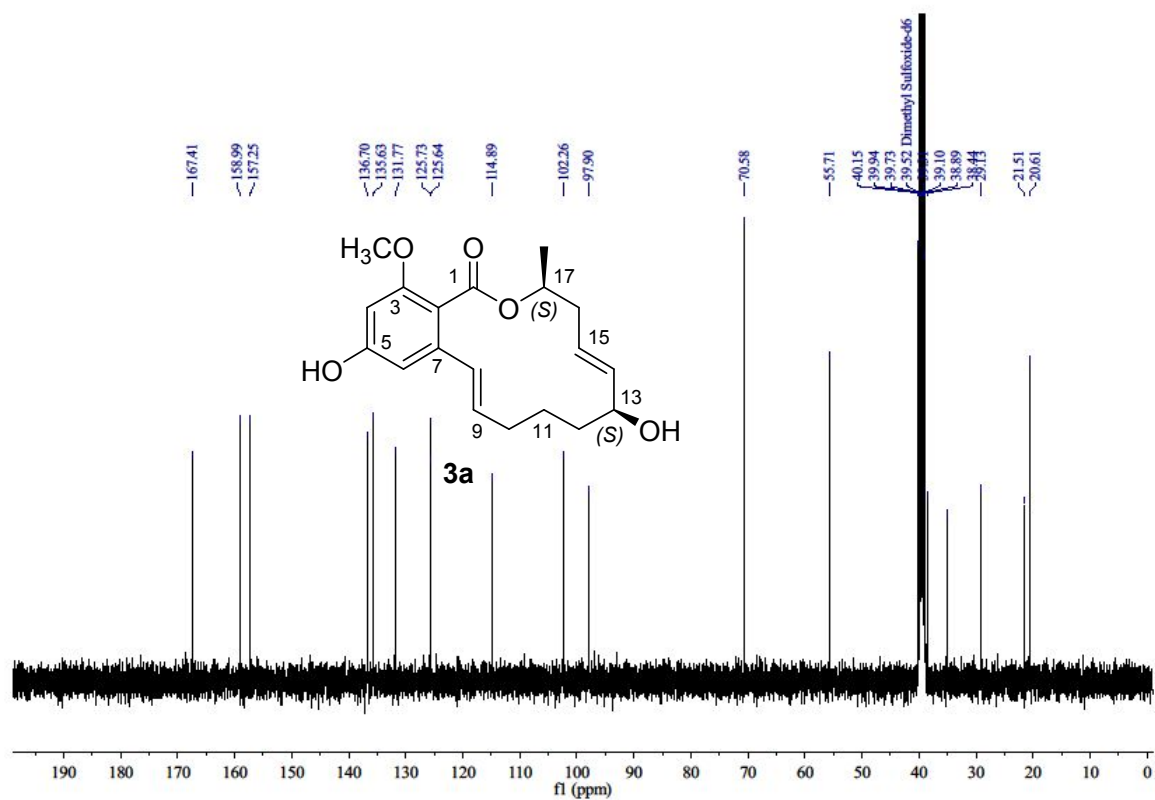

Figure S7.25. <sup>13</sup>C NMR spectrum of compound **3a** in DMSO-*d*<sub>6</sub>

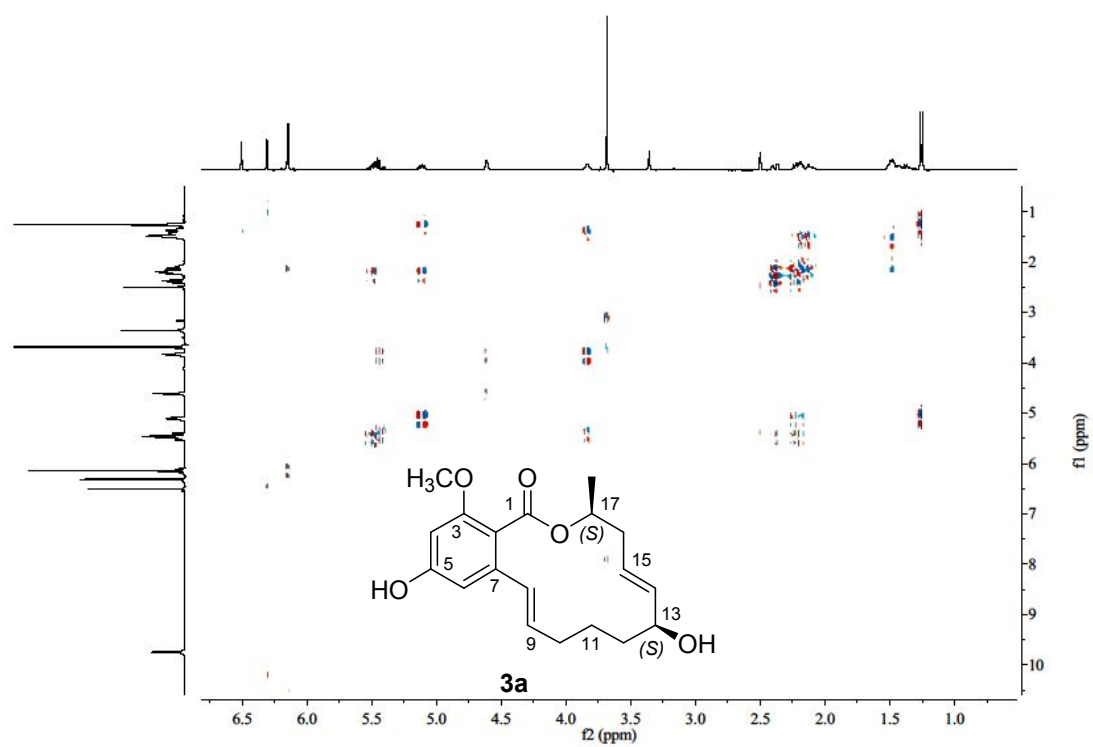

Figure S7.26.  $^1\text{H}$ - $^1\text{H}$  COSY spectrum of compound **3a** in  $\text{DMSO}-d_6$

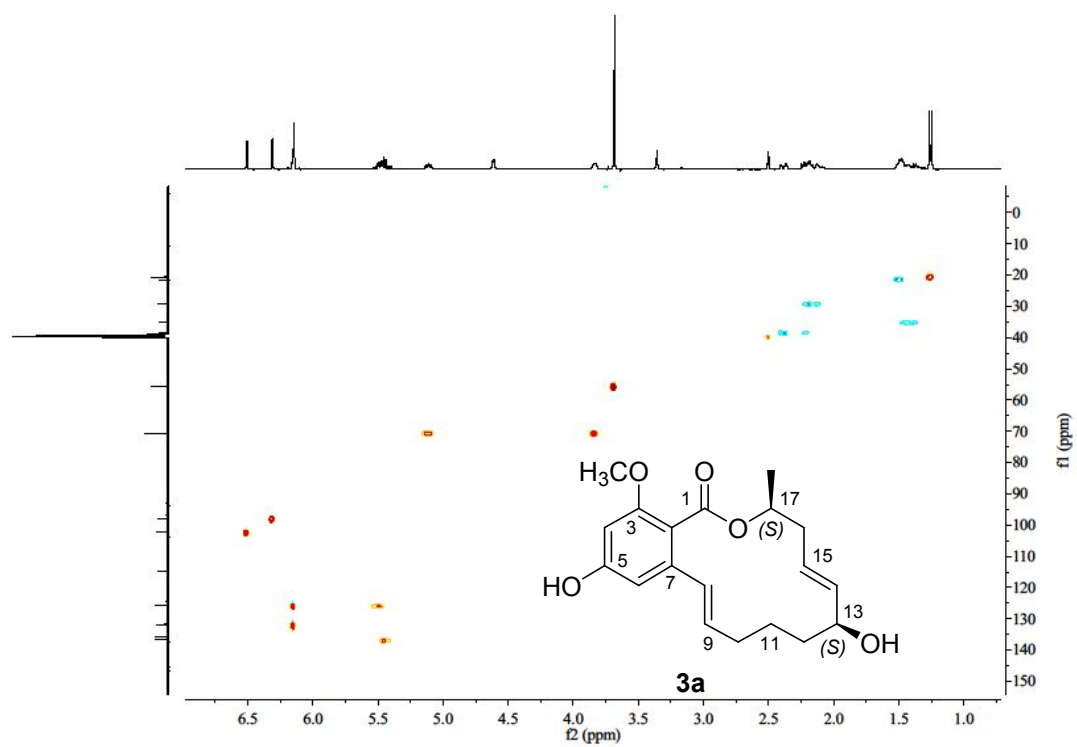

Figure S7.27. HSQC spectrum of compound **3a** in  $\text{DMSO}-d_6$

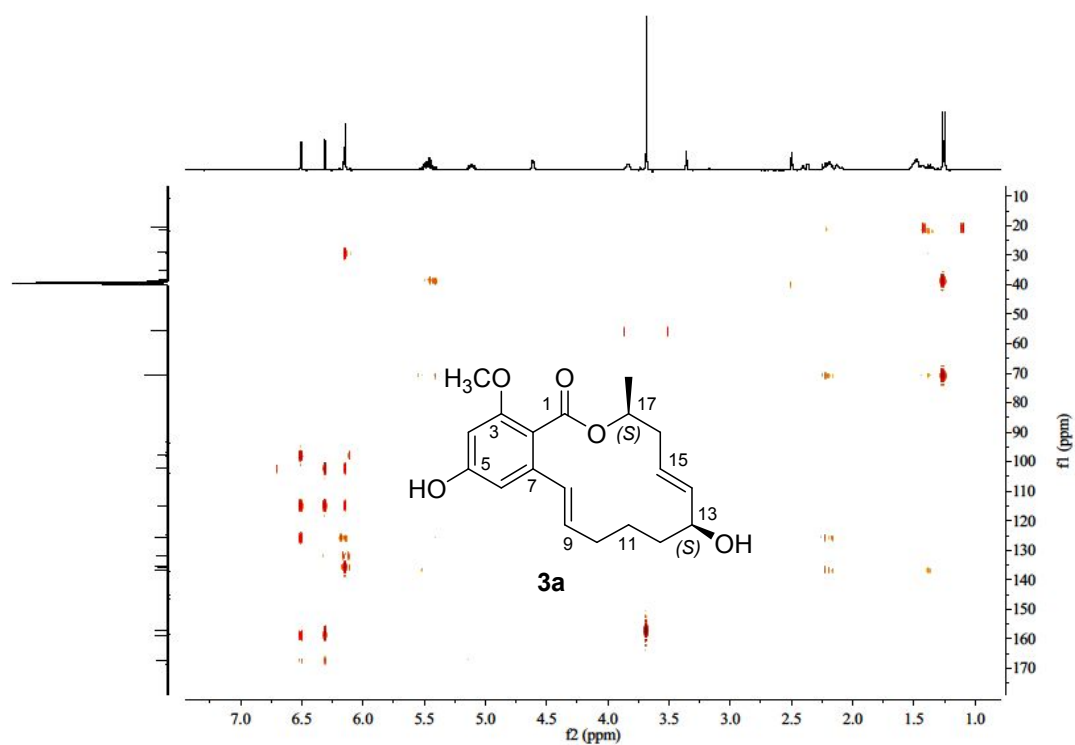

Figure S7.28. HMBC spectrum of compound **3a** in DMSO-*d*<sub>6</sub>

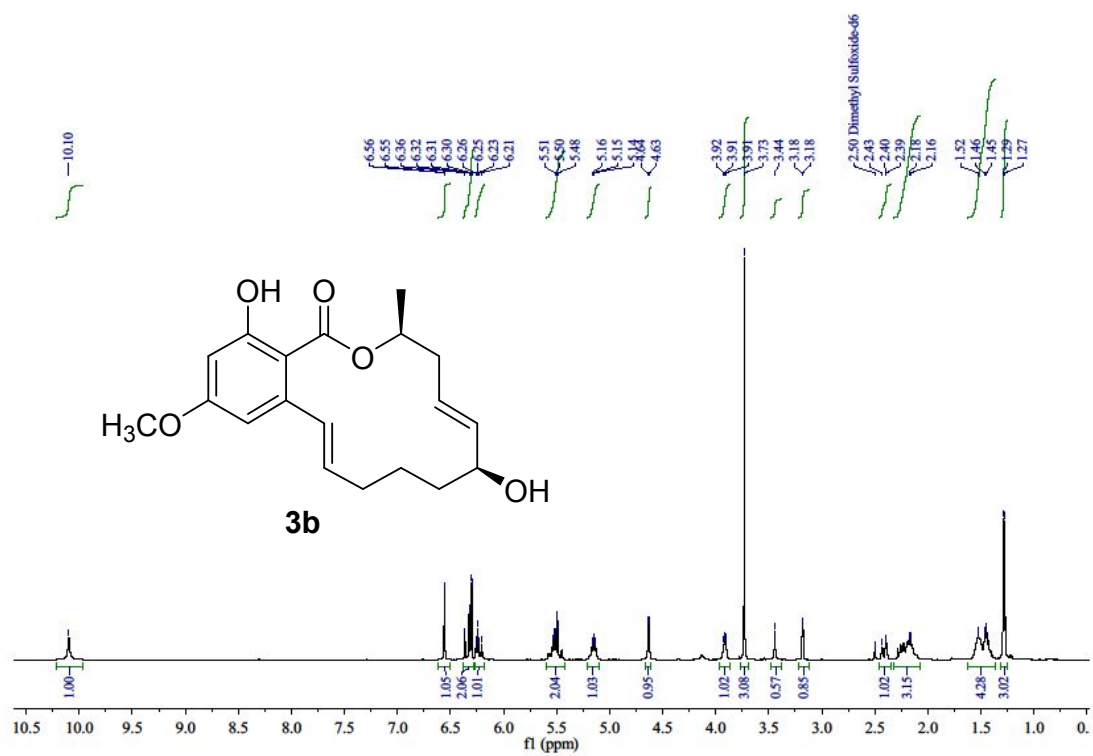

Figure S7.29.  $^1\text{H}$  NMR spectrum of compound **3b** in  $\text{DMSO}-d_6$

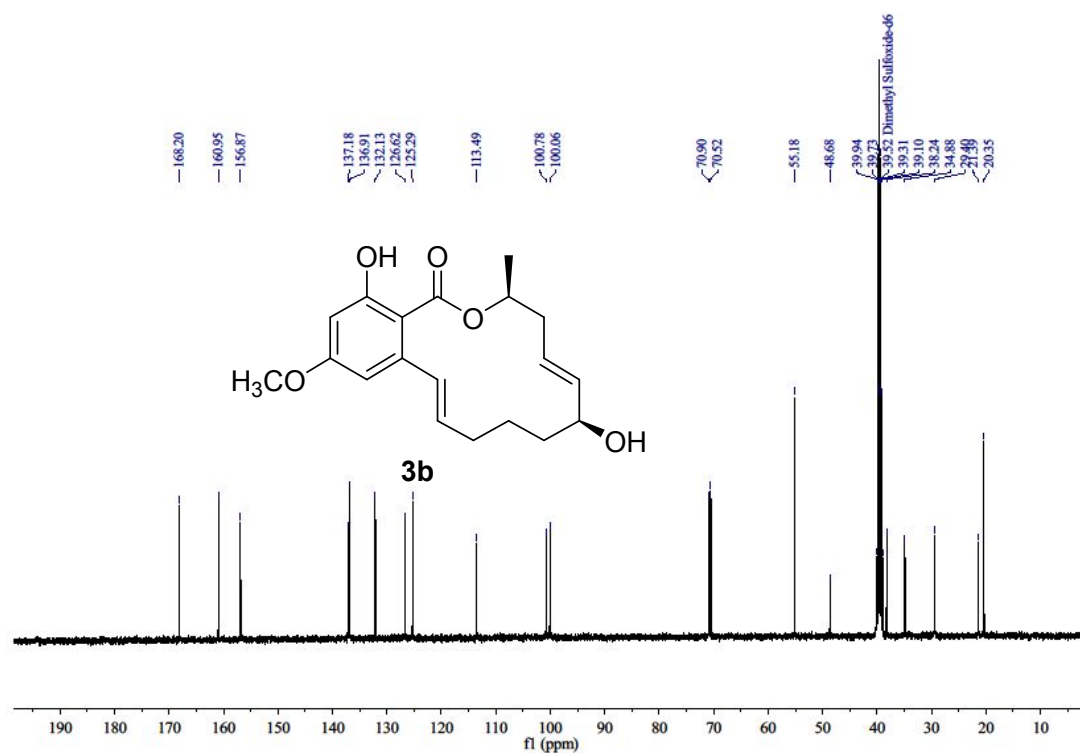

Figure S7.30. <sup>13</sup>C NMR spectrum of compound 3b in DMSO-*d*<sub>6</sub>

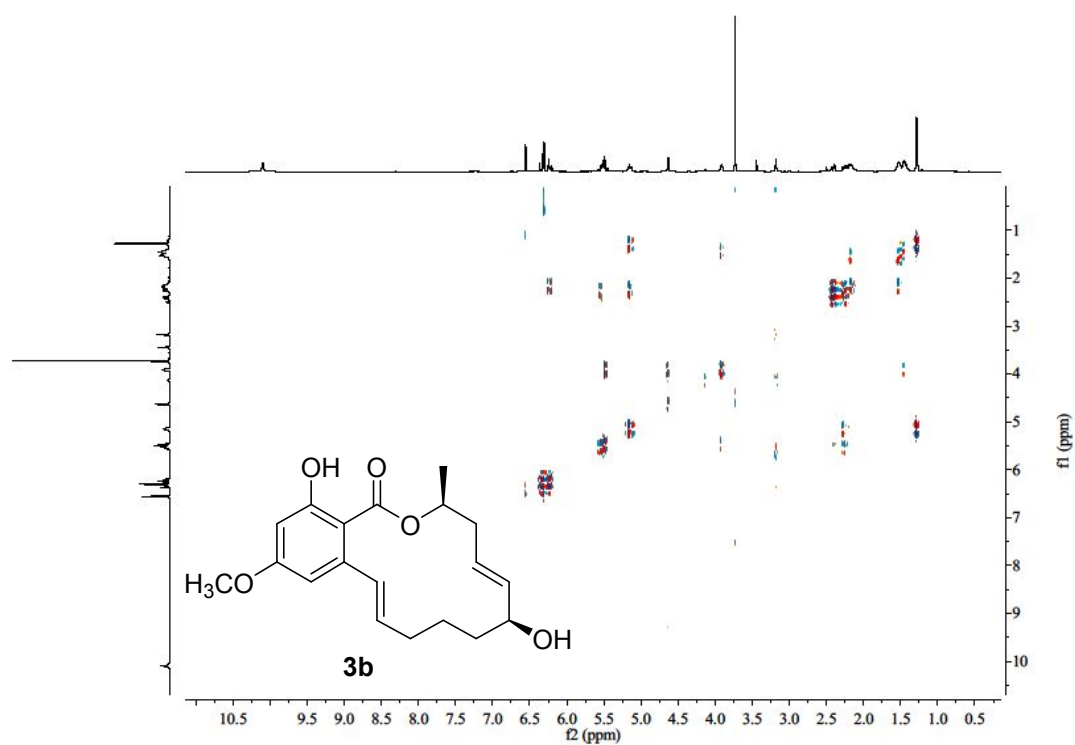

Figure S7.31.  $^1\text{H}$ - $^1\text{H}$  COSY spectrum of compound **3b** in  $\text{DMSO}-d_6$



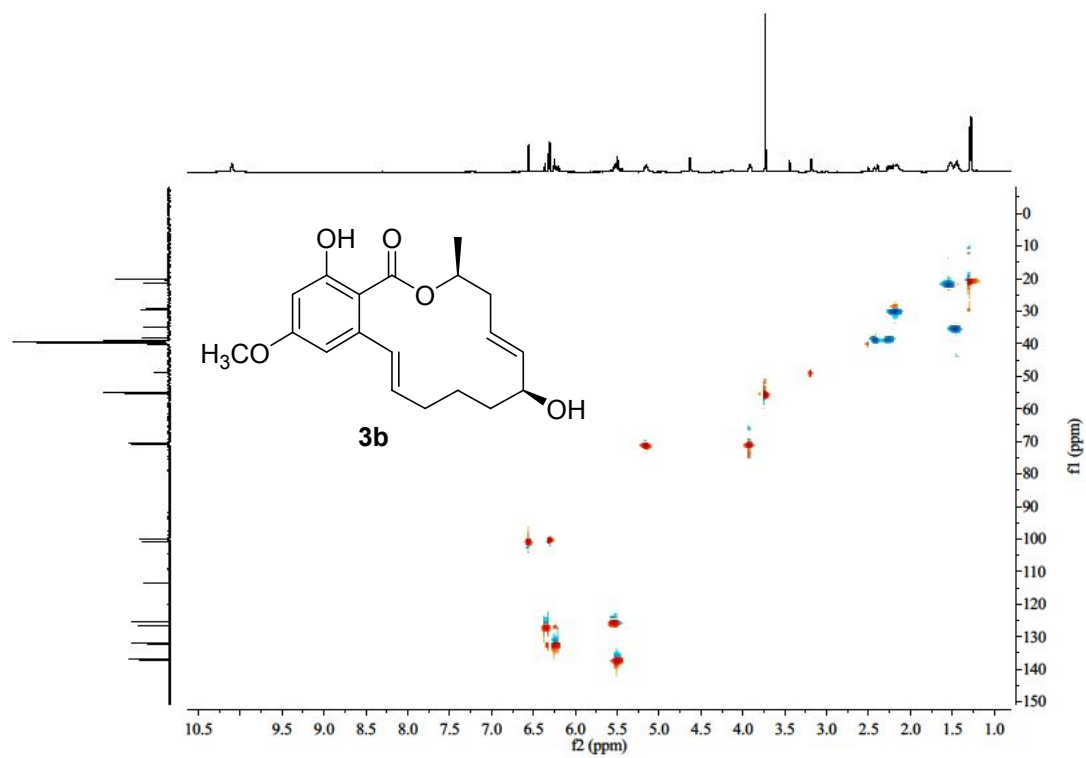

Figure S7.32. HSQC spectrum of compound **3b** in  $\text{DMSO-}d_6$

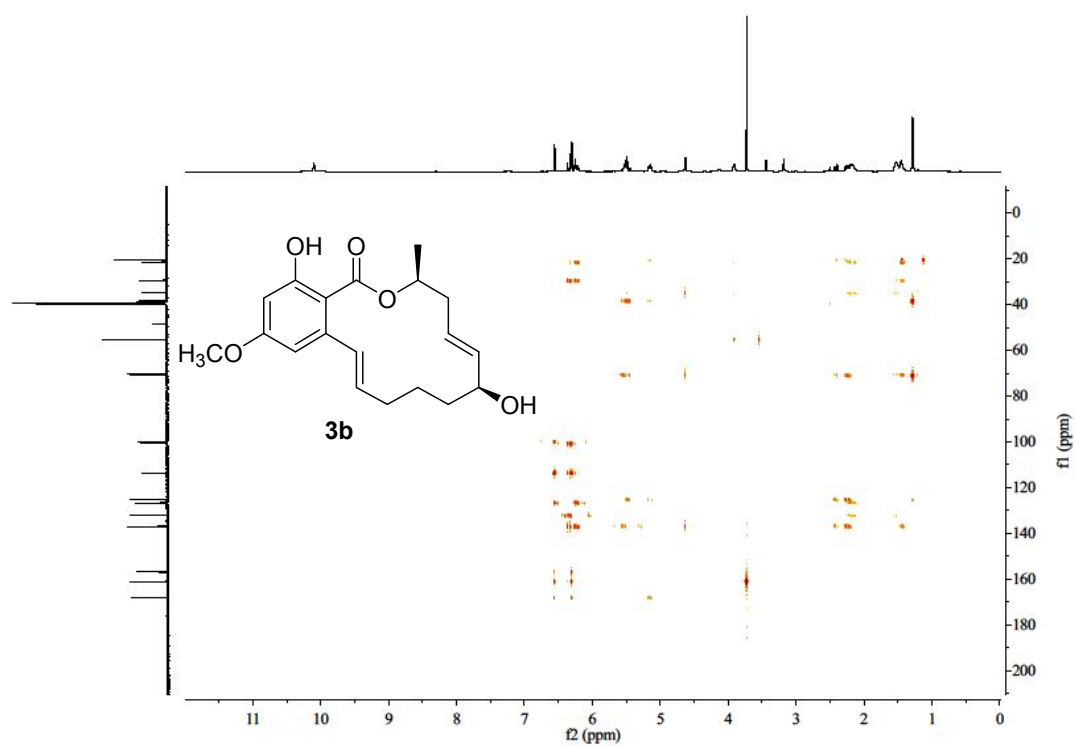

Figure S7.33. HMBC spectrum of compound **3b** in  $\text{DMSO}-d_6$

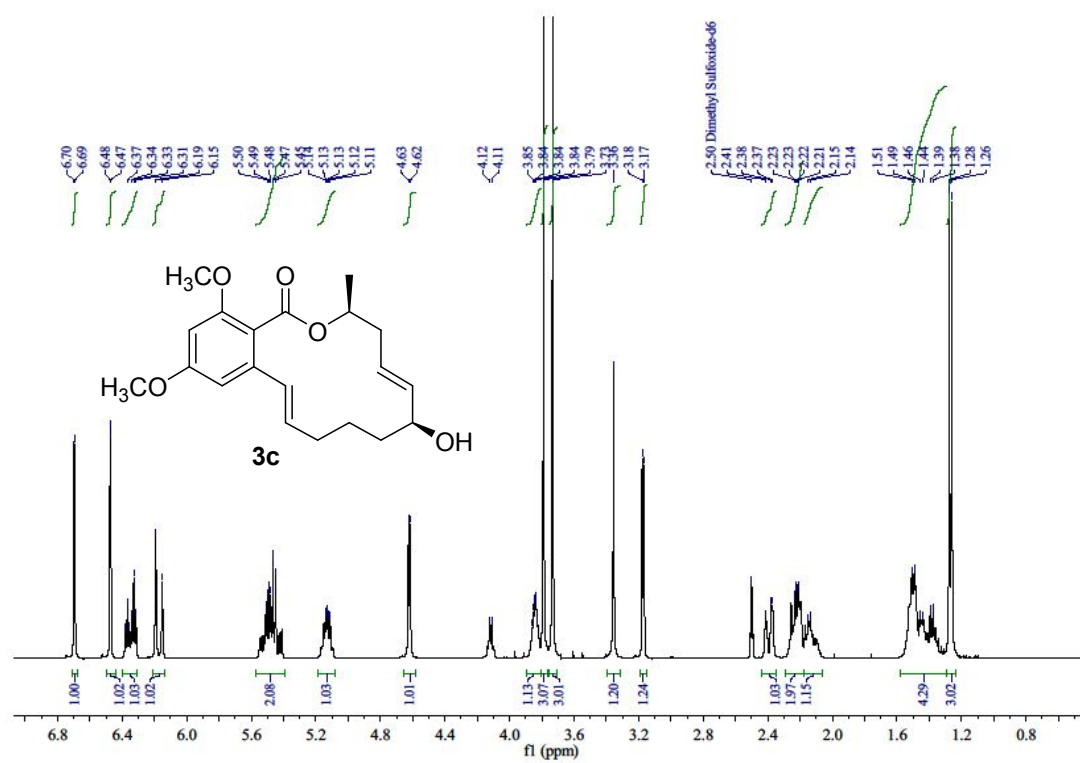

Figure S7.34.  $^1\text{H}$  NMR spectrum of compound 3c in  $\text{DMSO}-d_6$

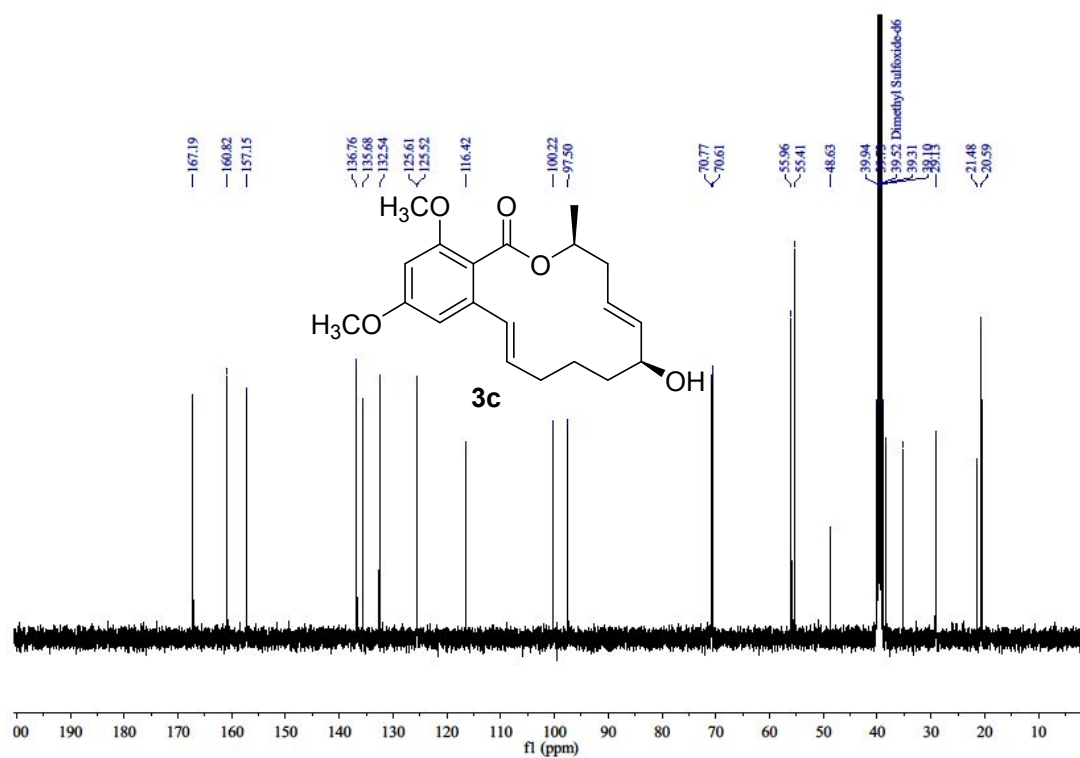

Figure S7.35.  $^{13}\text{C}$  NMR spectrum of compound **3c** in  $\text{DMSO}-d_6$

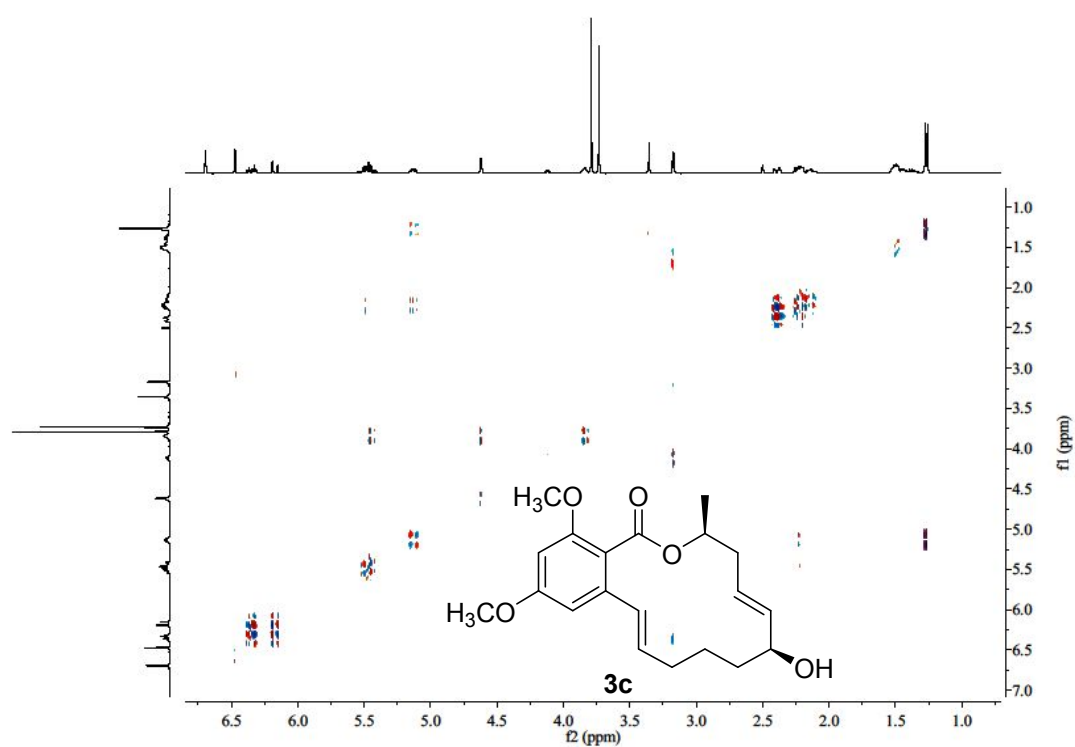

Figure S7.36.  $^1\text{H}$ - $^1\text{H}$  COSY spectrum of compound **3c** in  $\text{DMSO}-d_6$

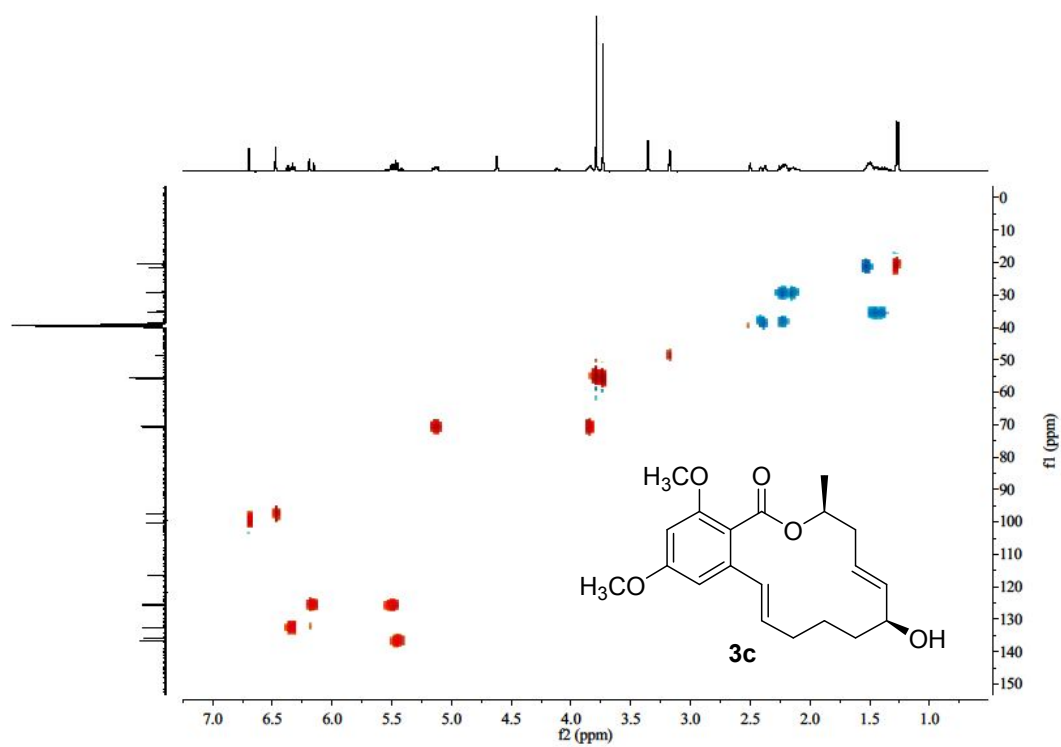

**Figure S7.37.** HSQC spectrum of compound **3c** in  $\text{DMSO-}d_6$

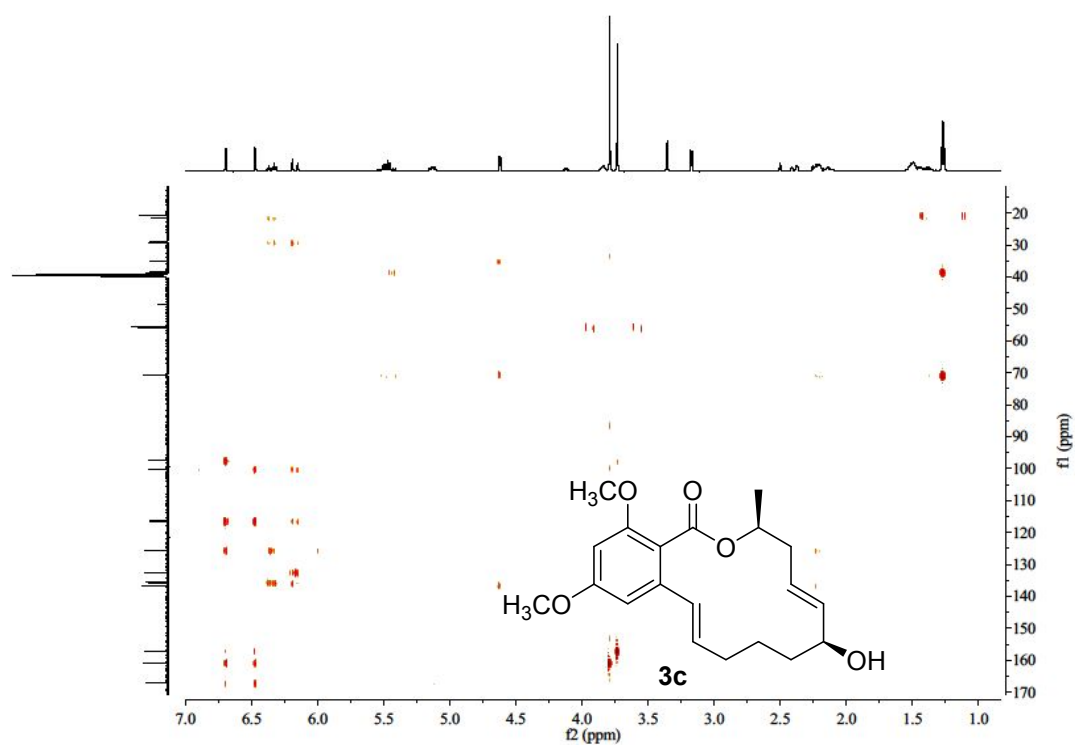

**Figure S7.38.** HMBC spectrum of compound **3c** in DMSO-*d*<sub>6</sub>

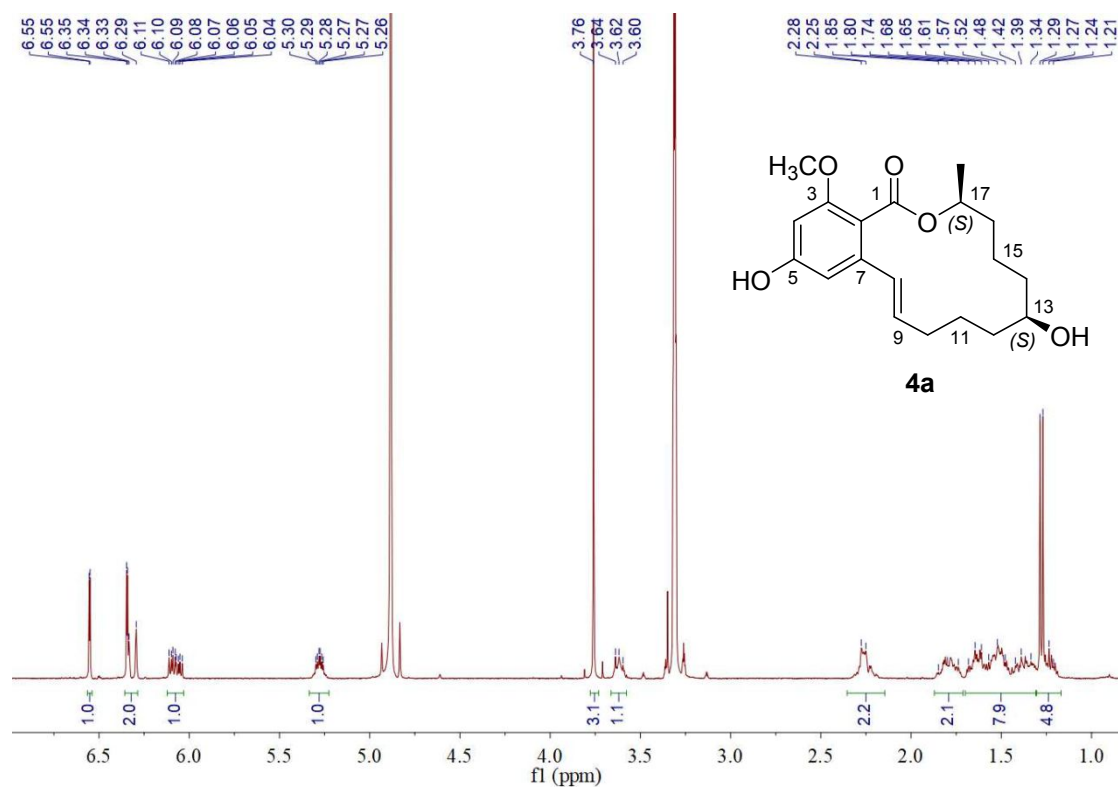

**Figure S7.39.**  $^1\text{H}$  NMR spectrum of compound 4a in methanol- $d_4$



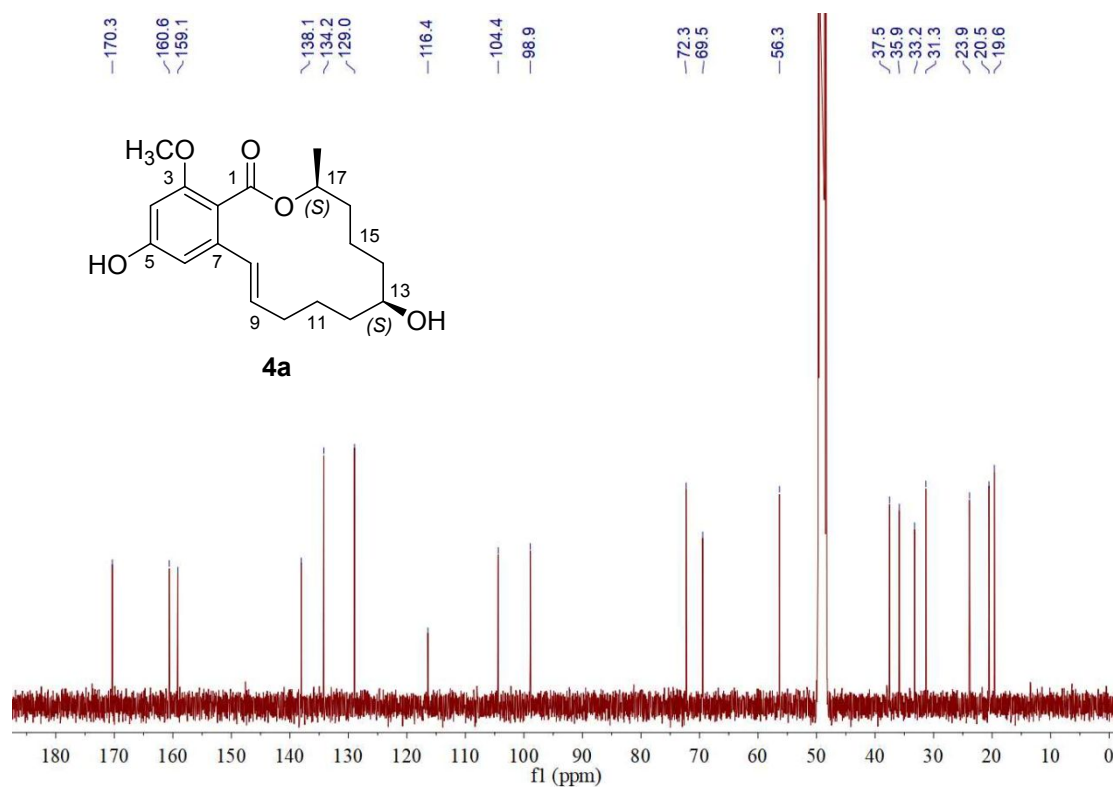

Figure S7.40.  $^{13}\text{C}$  NMR spectrum of compound **4a** in methanol- $d_4$

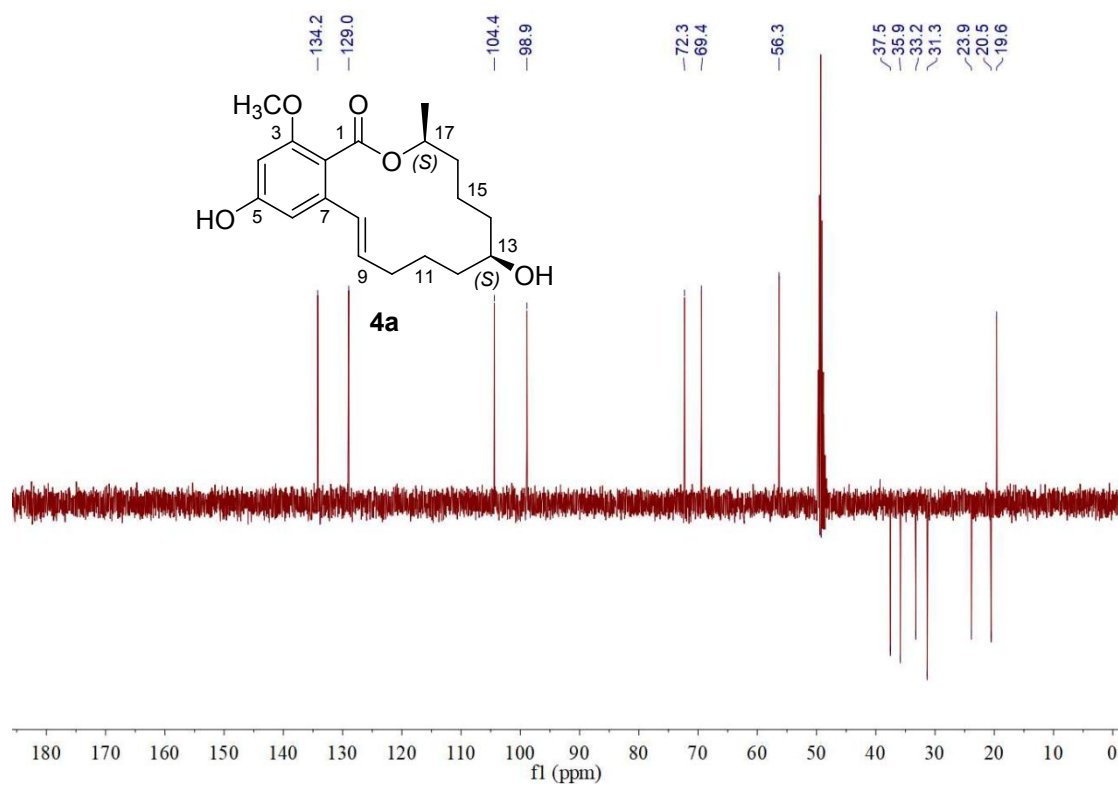

Figure S7.41. DEPT 135 spectrum of compound 4a in methanol-*d*<sub>4</sub>

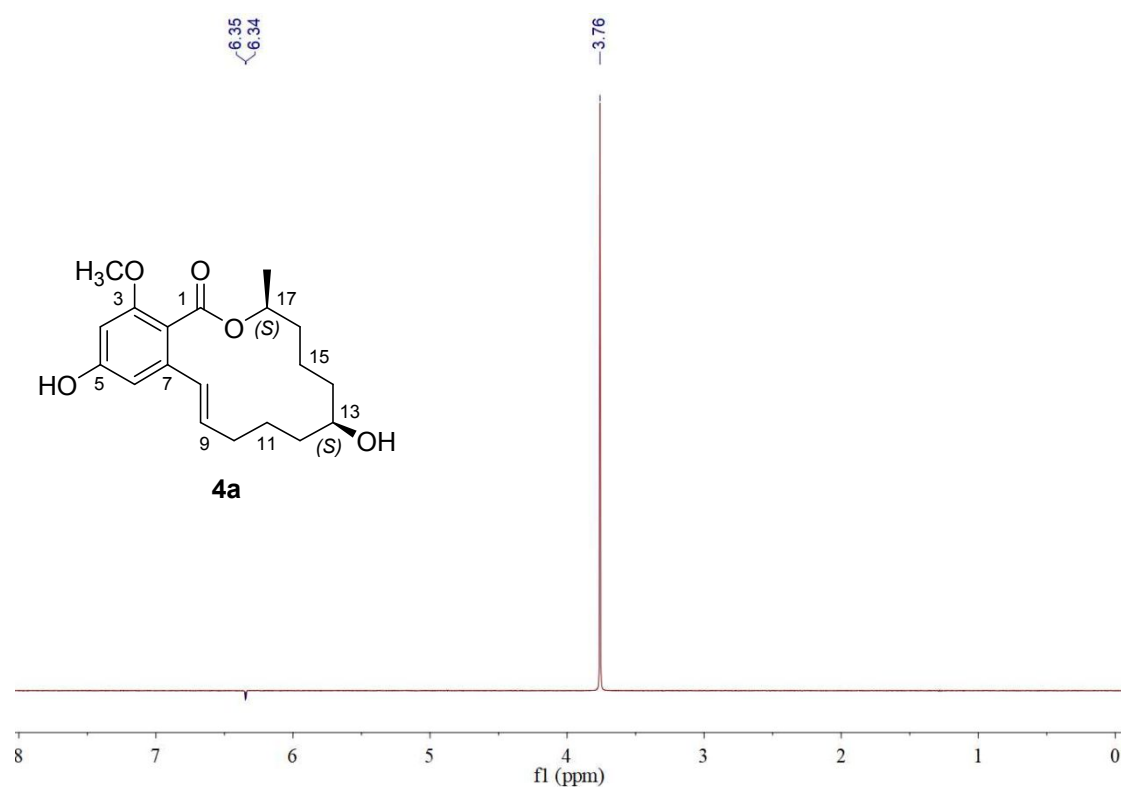

**Figure S7.42.** 1D NOESY spectrum of compound **4a** in methanol-*d*<sub>4</sub>

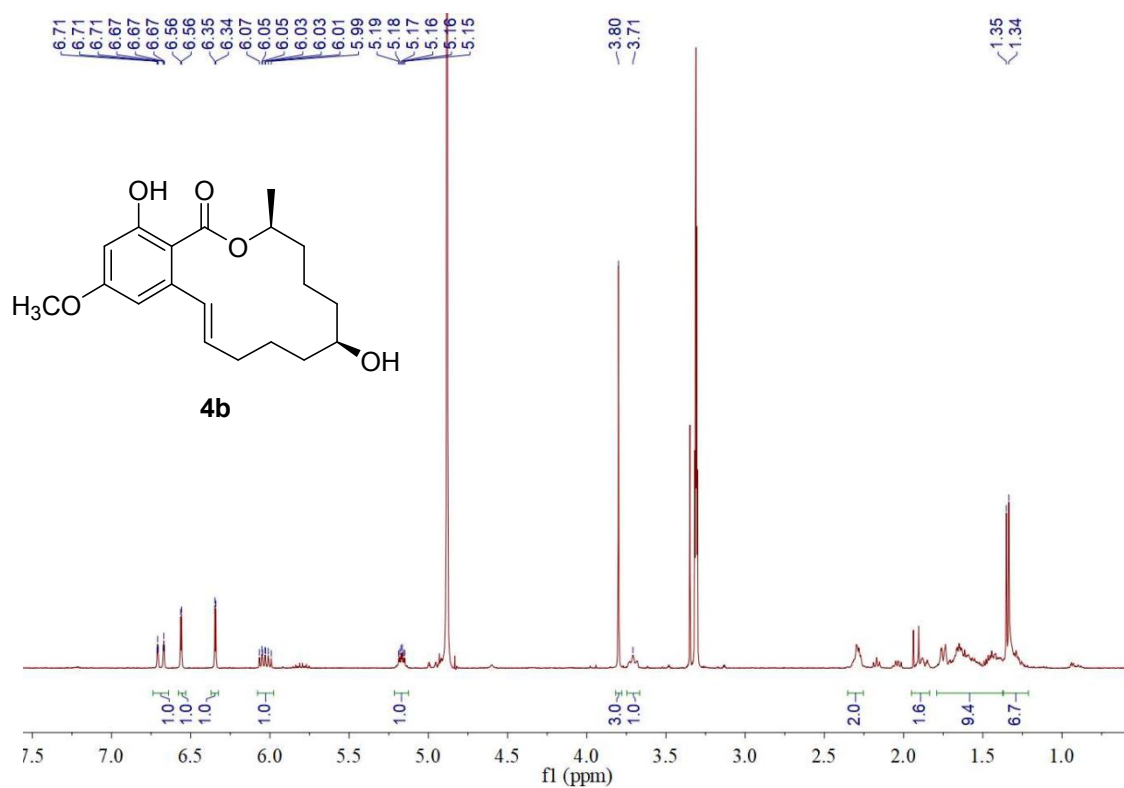

Figure S7.43.  $^1\text{H}$  NMR spectrum of compound **4b** in methanol- $d_4$

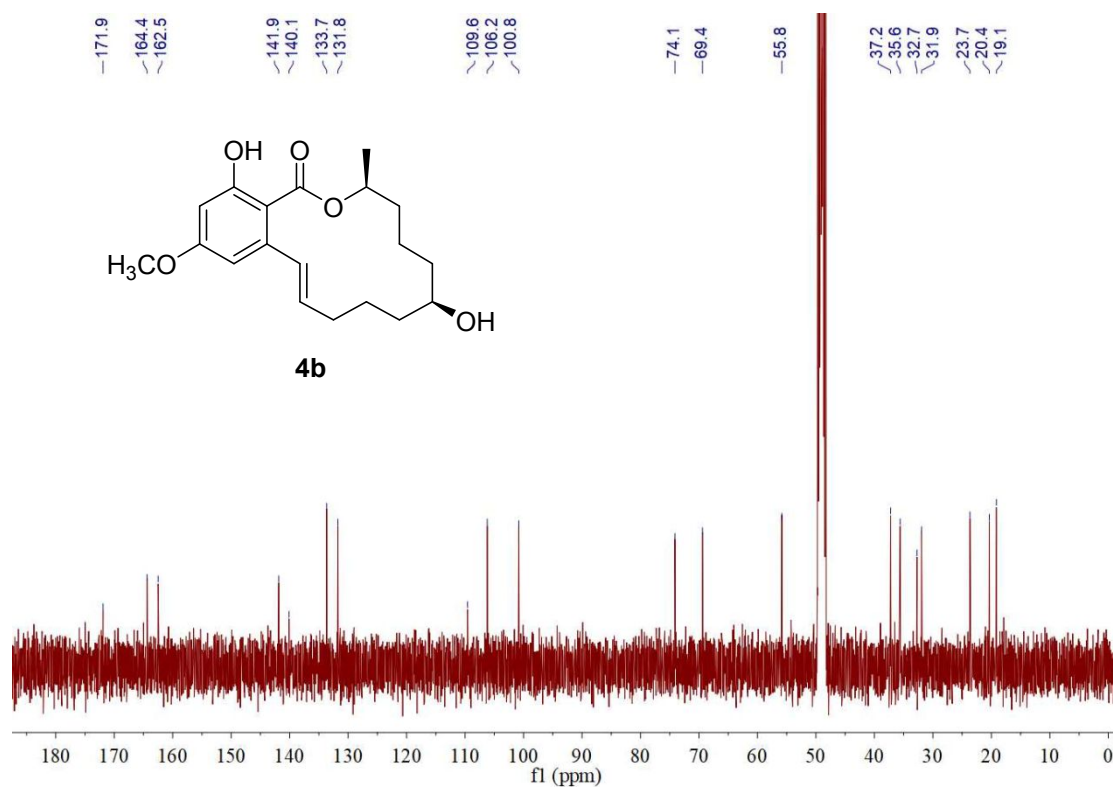

Figure S7.44.  $^{13}\text{C}$  NMR spectrum of compound **4b** in methanol- $d_4$

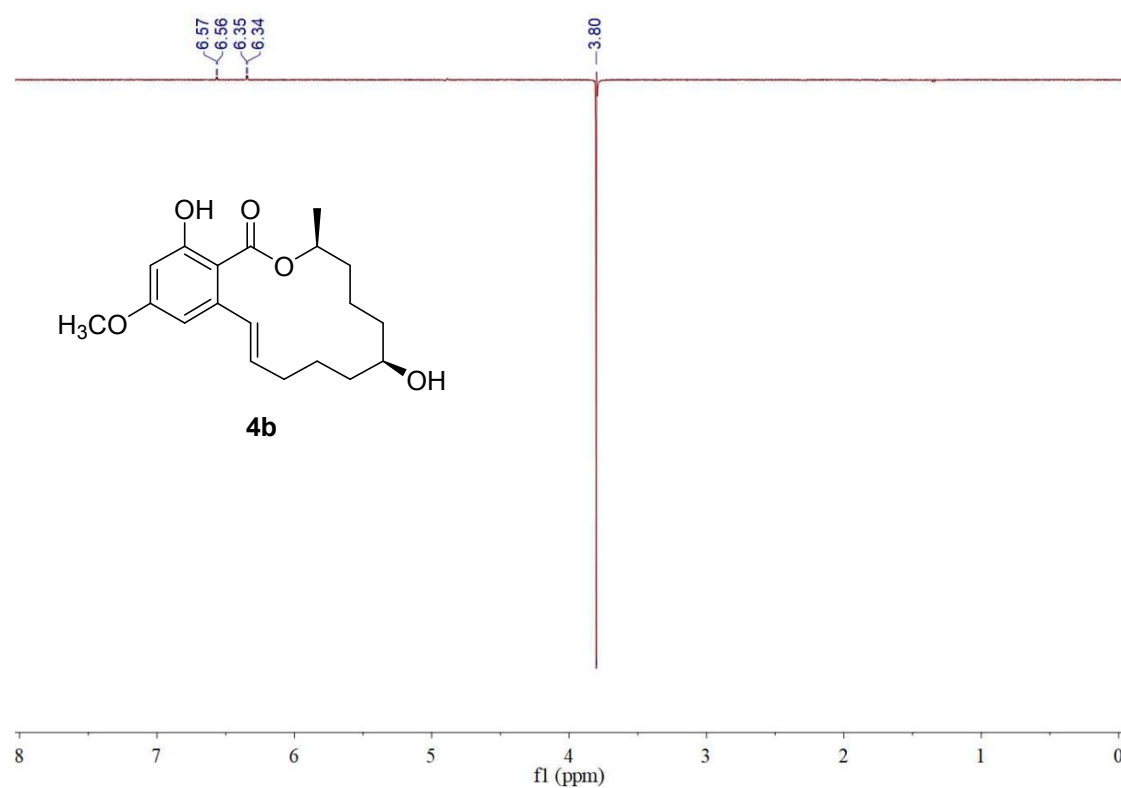

**Figure S7.45.** 1D NOESY NMR spectrum of compound **4b** in methanol- $d_4$

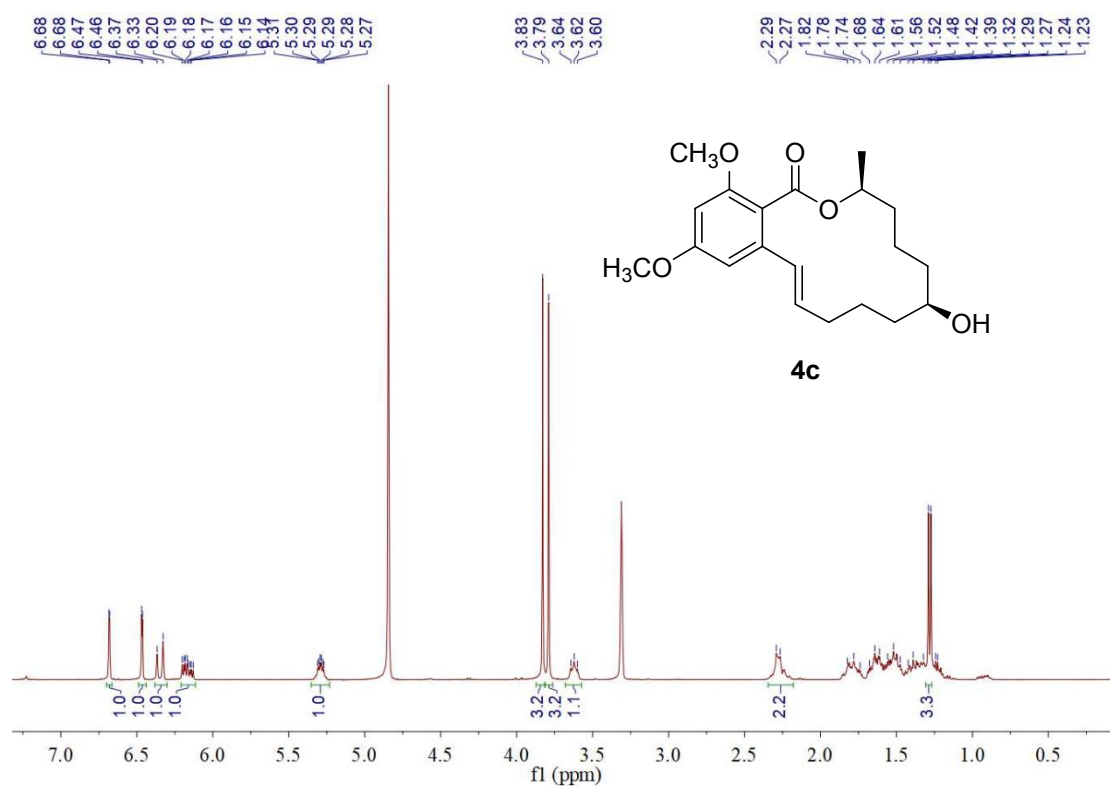

**Figure S7.46.** <sup>1</sup>H NMR spectrum of compound **4c** in methanol-*d*<sub>4</sub>

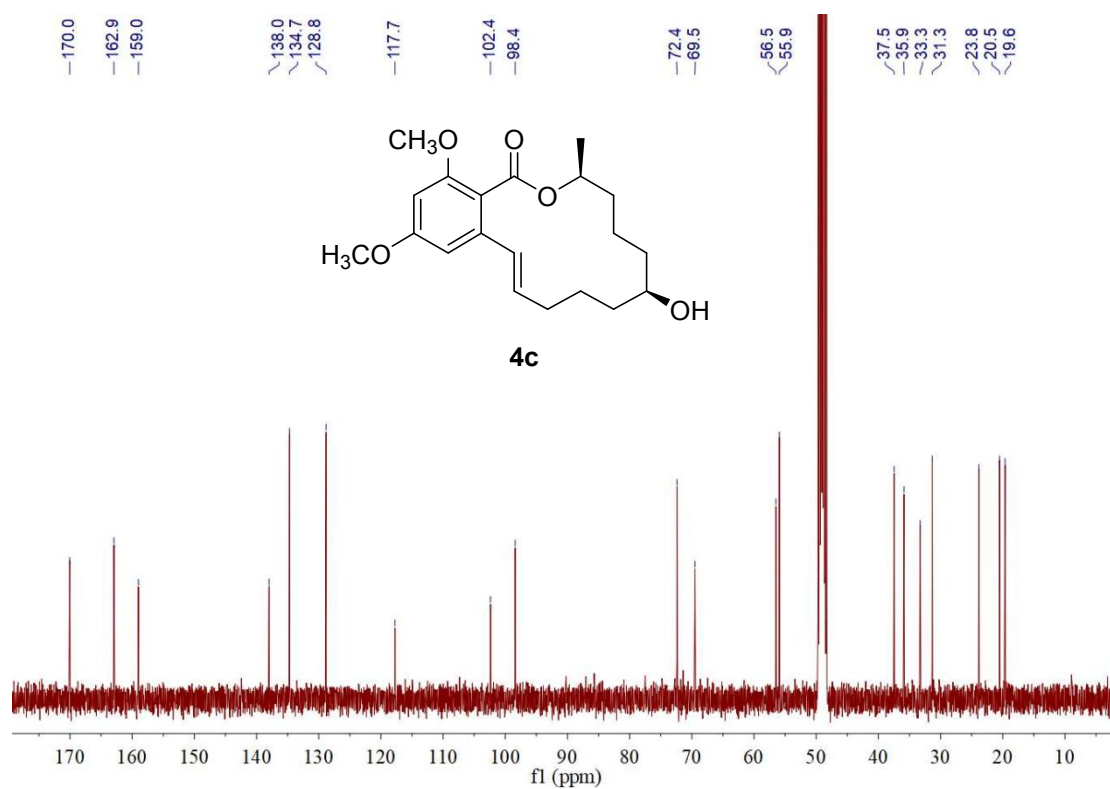

**Figure S7.47.** <sup>13</sup>C NMR spectrum of compound 4c in methanol-*d*<sub>4</sub>



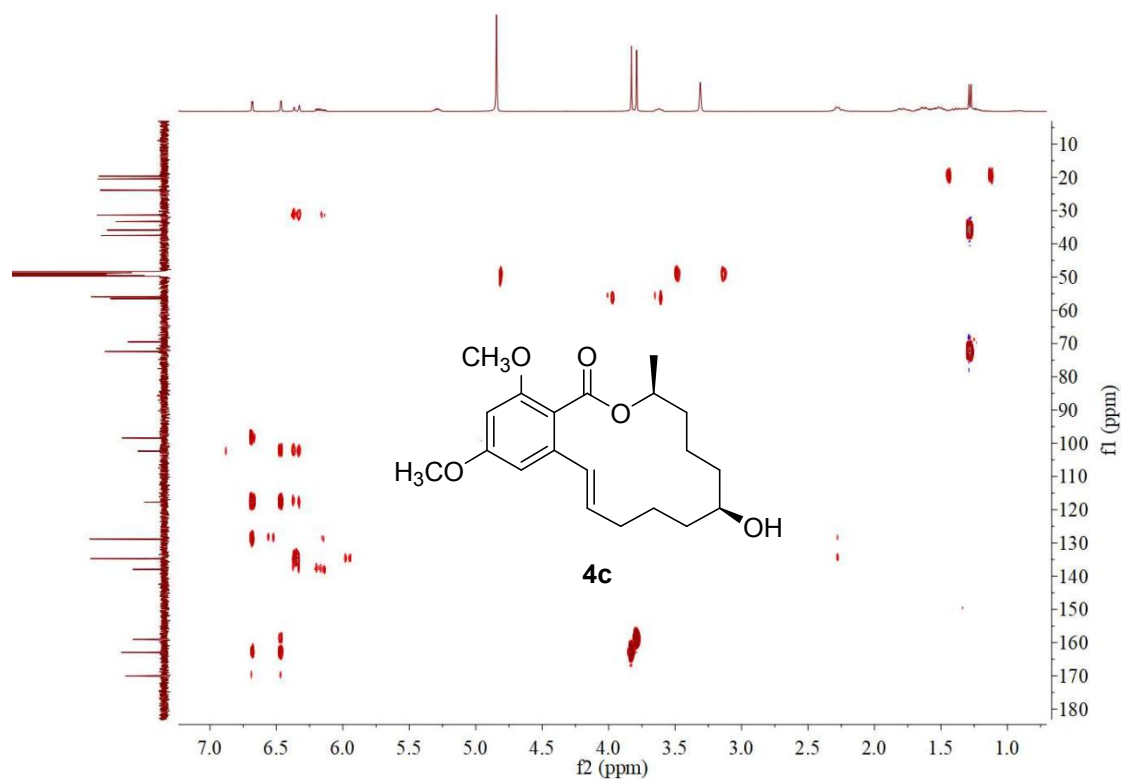

**Figure S7.48.** HMBC spectrum of compound 4c in methanol- $d_4$

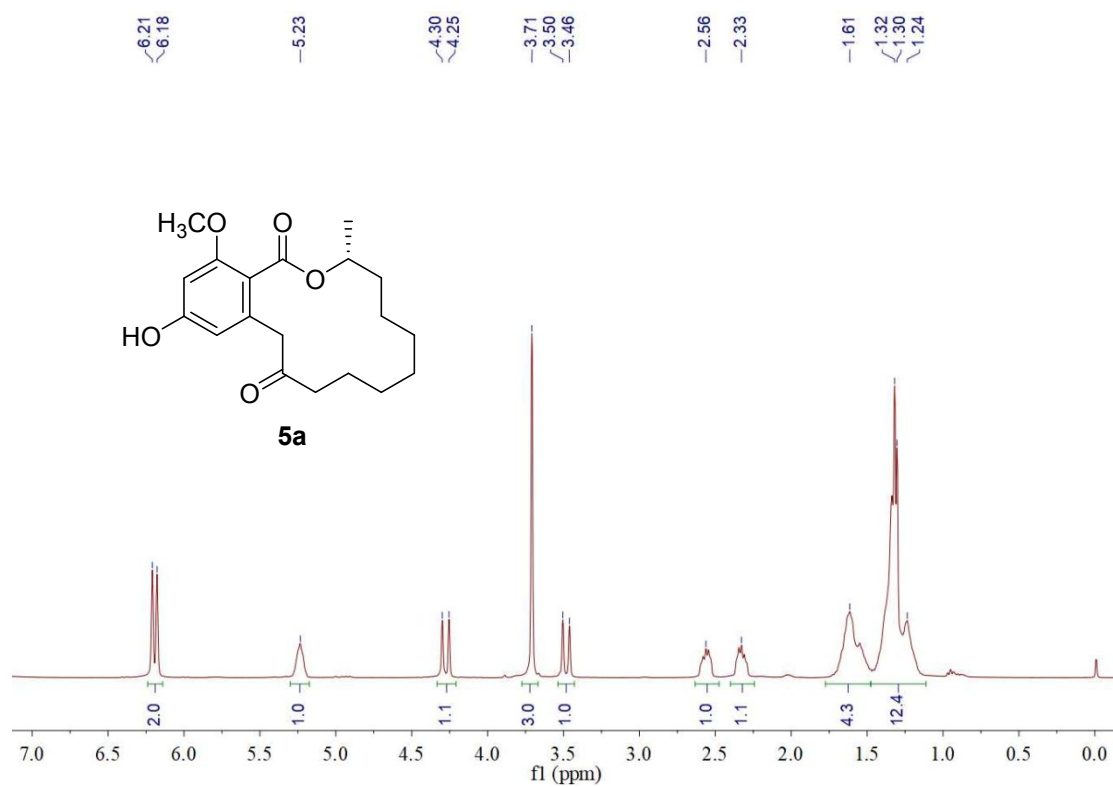

**Figure S7.49.** <sup>1</sup>H NMR spectrum of compound **5a** in CDCl<sub>3</sub>

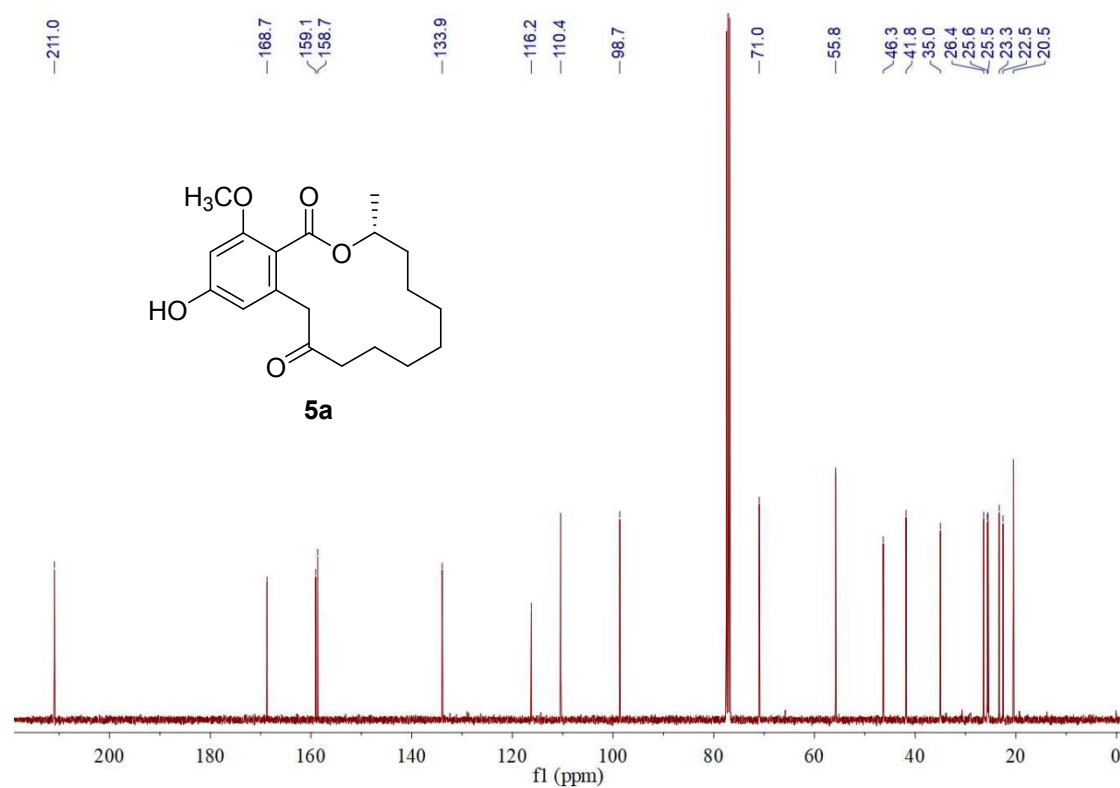

Figure S7.50. <sup>13</sup>C NMR spectrum of compound **5a** in CDCl<sub>3</sub>

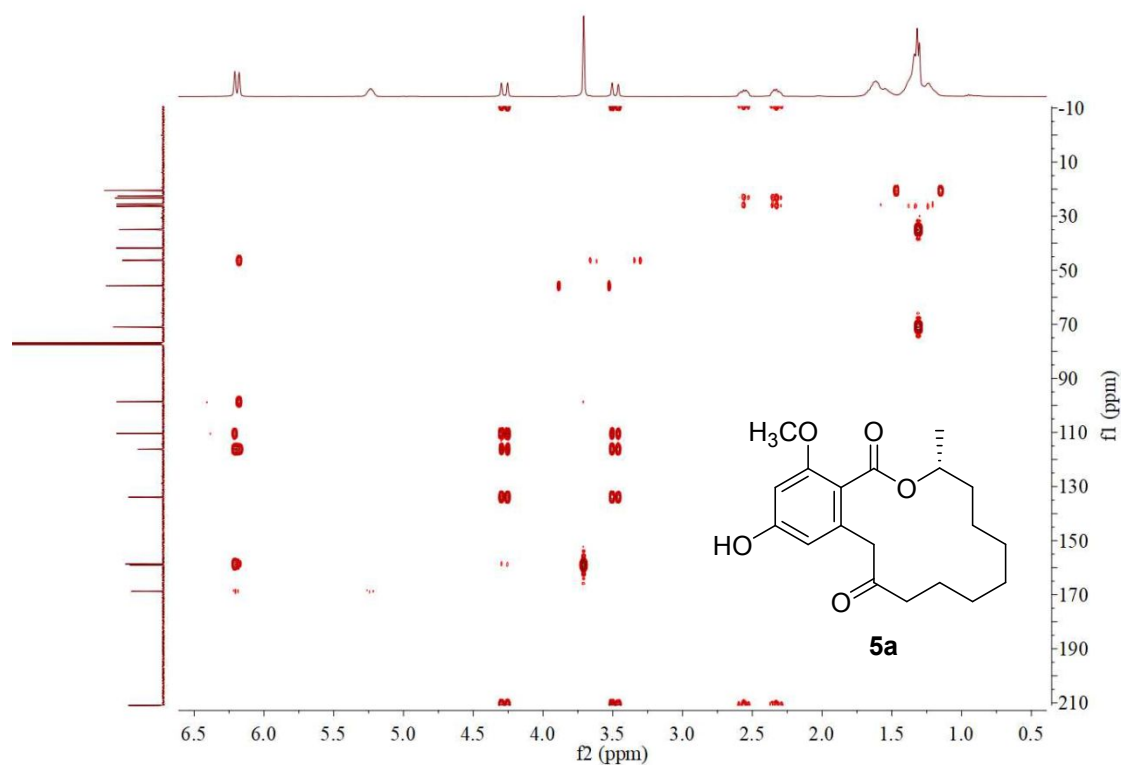

**Figure S7.51.** HMBC spectrum of compound **5a** in  $\text{CDCl}_3$

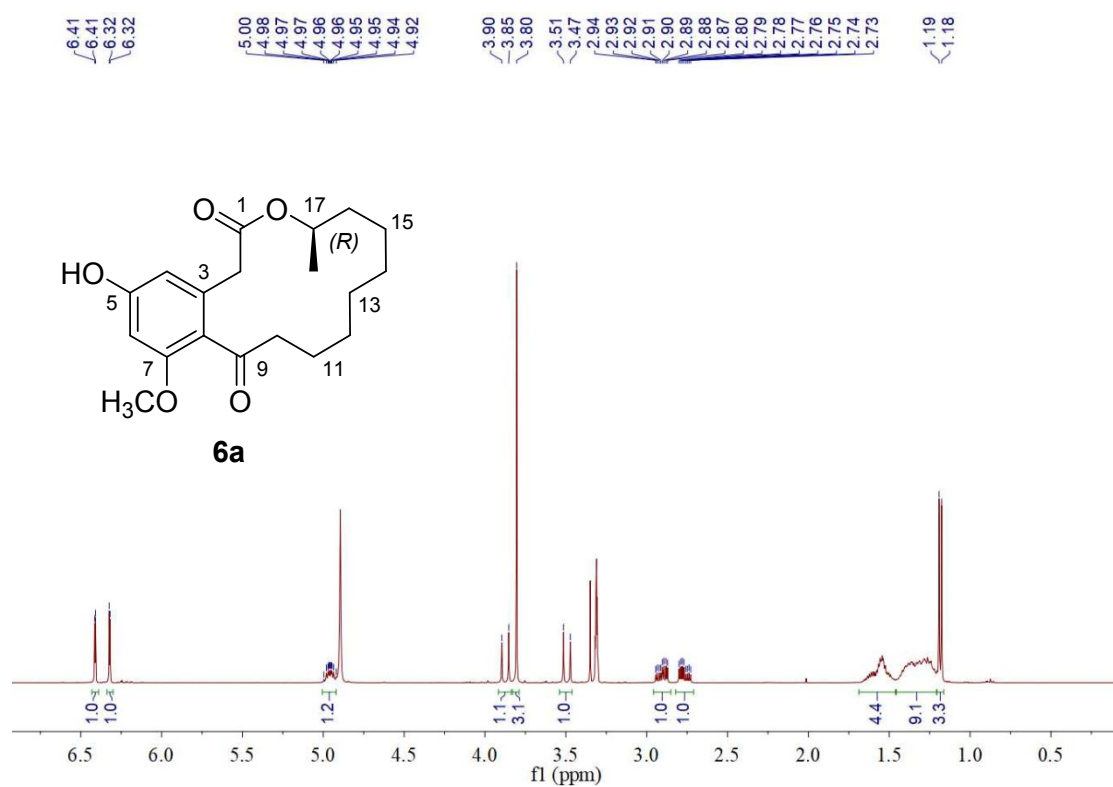

**Figure S7.52.**  $^1\text{H}$  NMR spectrum of compound **6a** in methanol- $d_4$

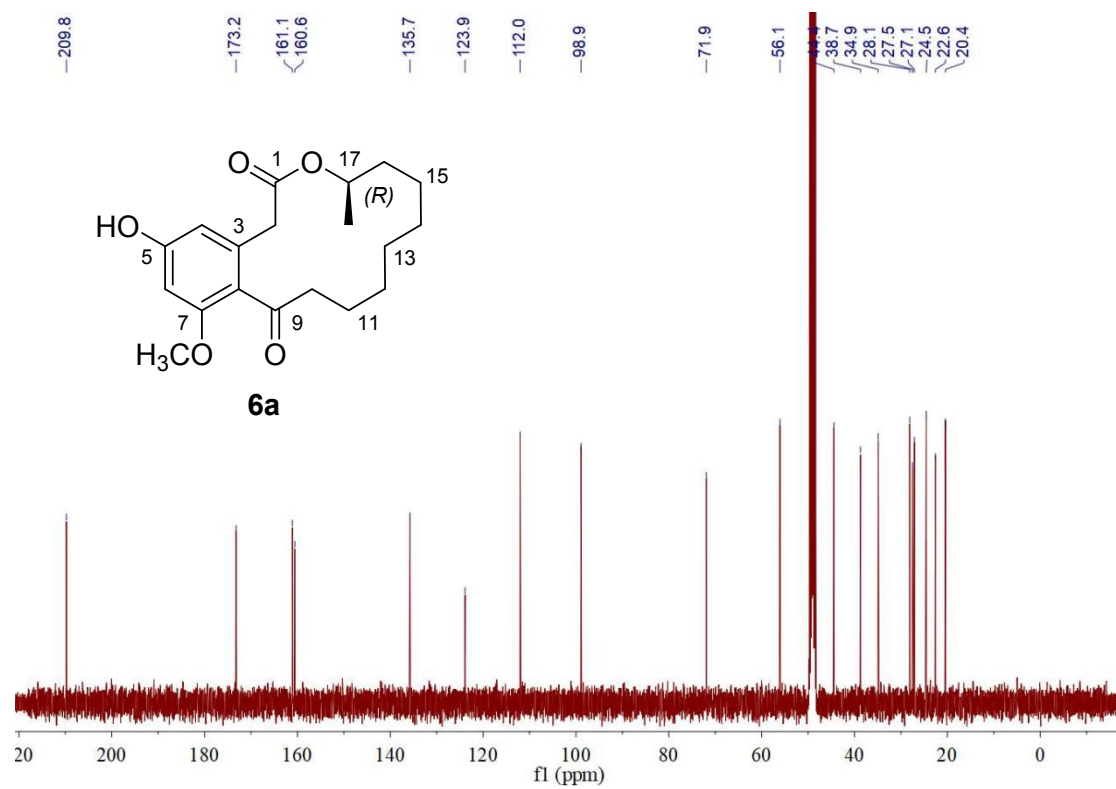

**Figure S7.53.**  $^{13}\text{C}$  NMR spectrum of compound **6a** in methanol- $d_4$

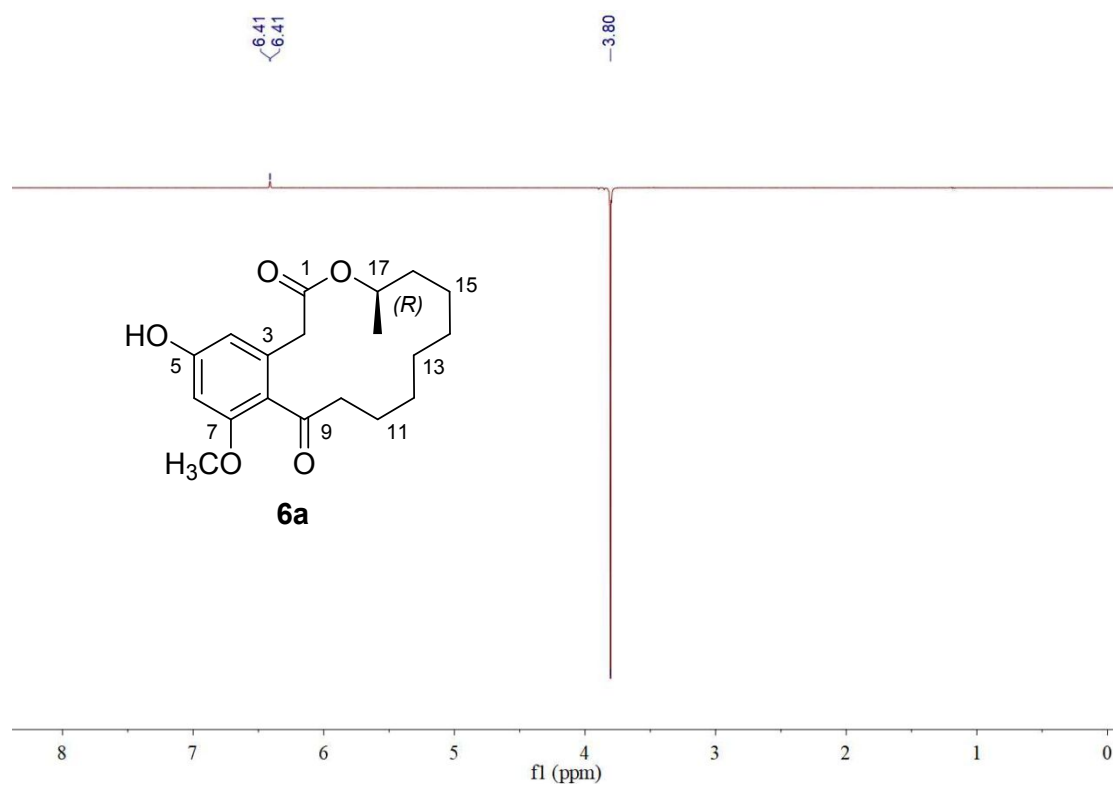

**Figure S7.54.** 1D NOESY spectrum of compound **6a** in methanol-*d*<sub>4</sub>

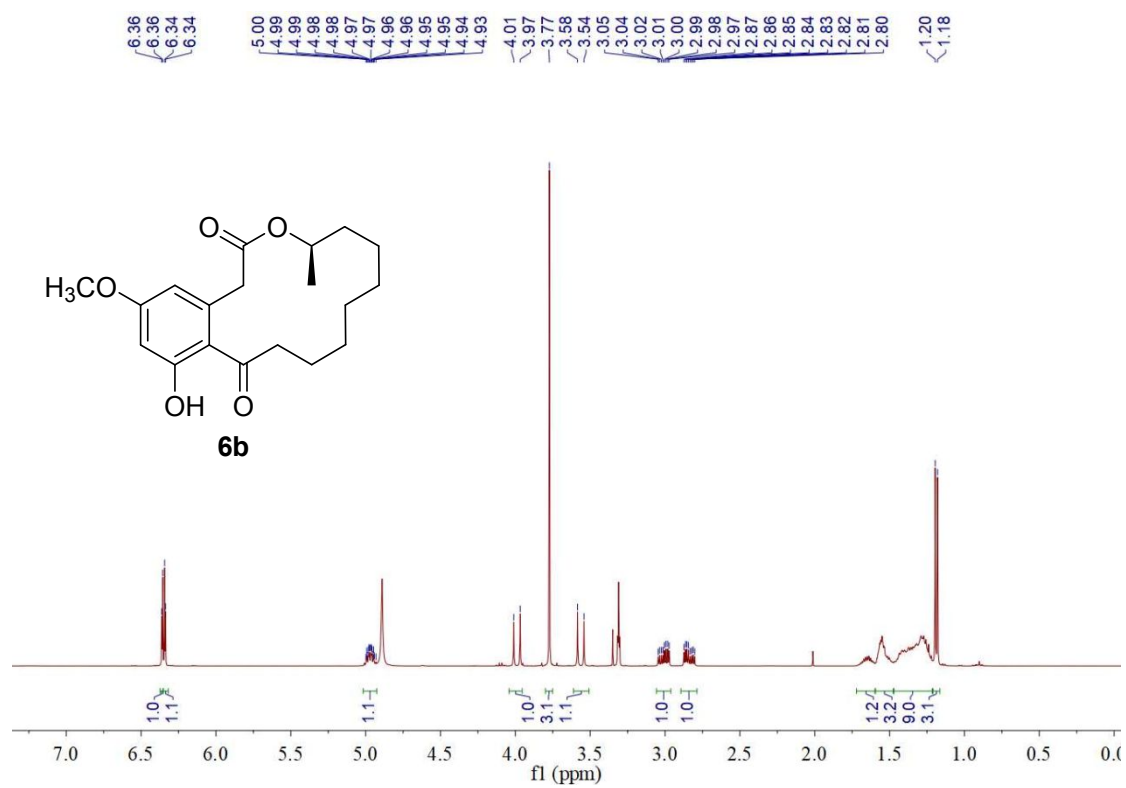

**Figure S7.55.** <sup>1</sup>H NMR spectrum of compound **6b** in methanol-*d*<sub>4</sub>



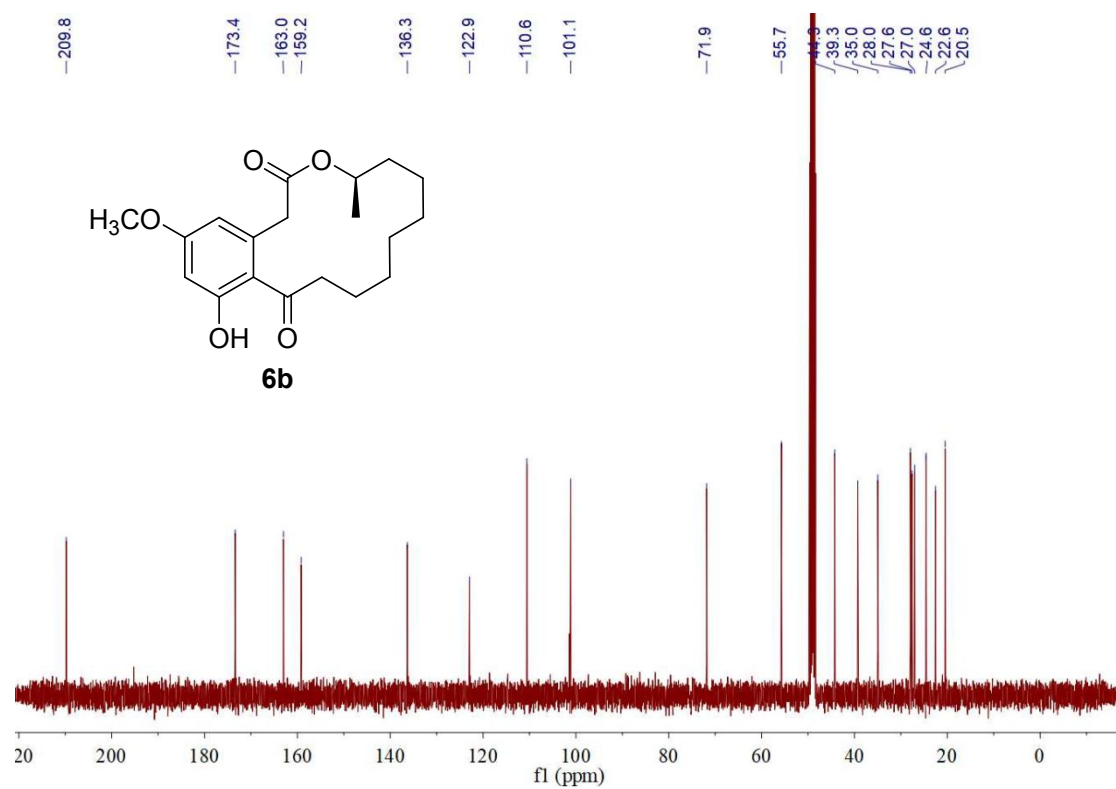

Figure S7.56. <sup>13</sup>C NMR spectrum of compound **6b** in methanol-*d*<sub>4</sub>

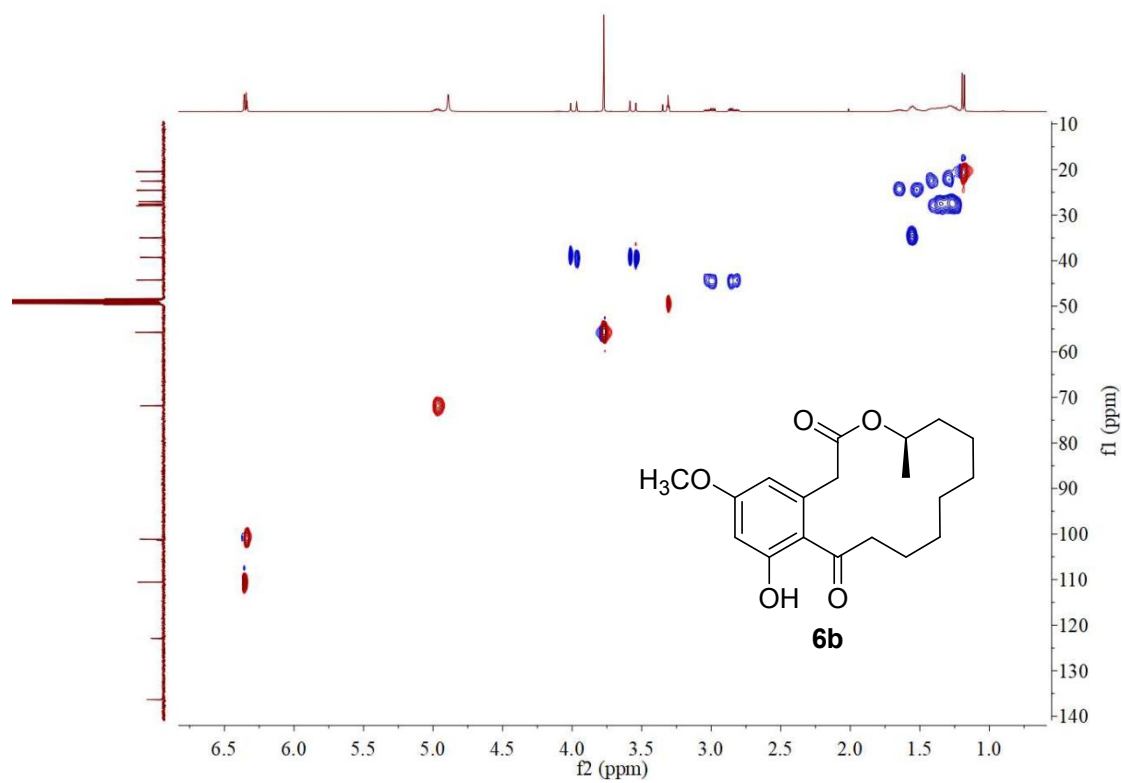

**Figure S7.57.** HSQC spectrum of compound 6b in methanol- $d_4$

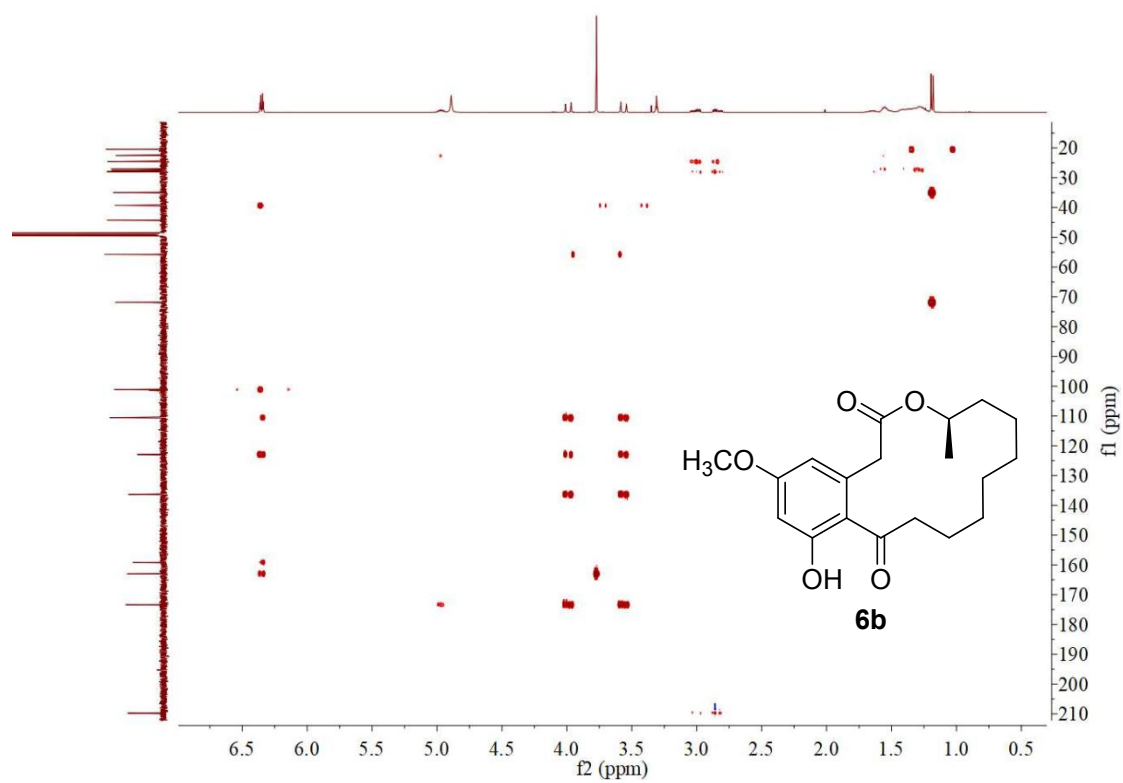

**Figure S7.58.** HMBC spectrum of compound **6b** in methanol- $d_4$

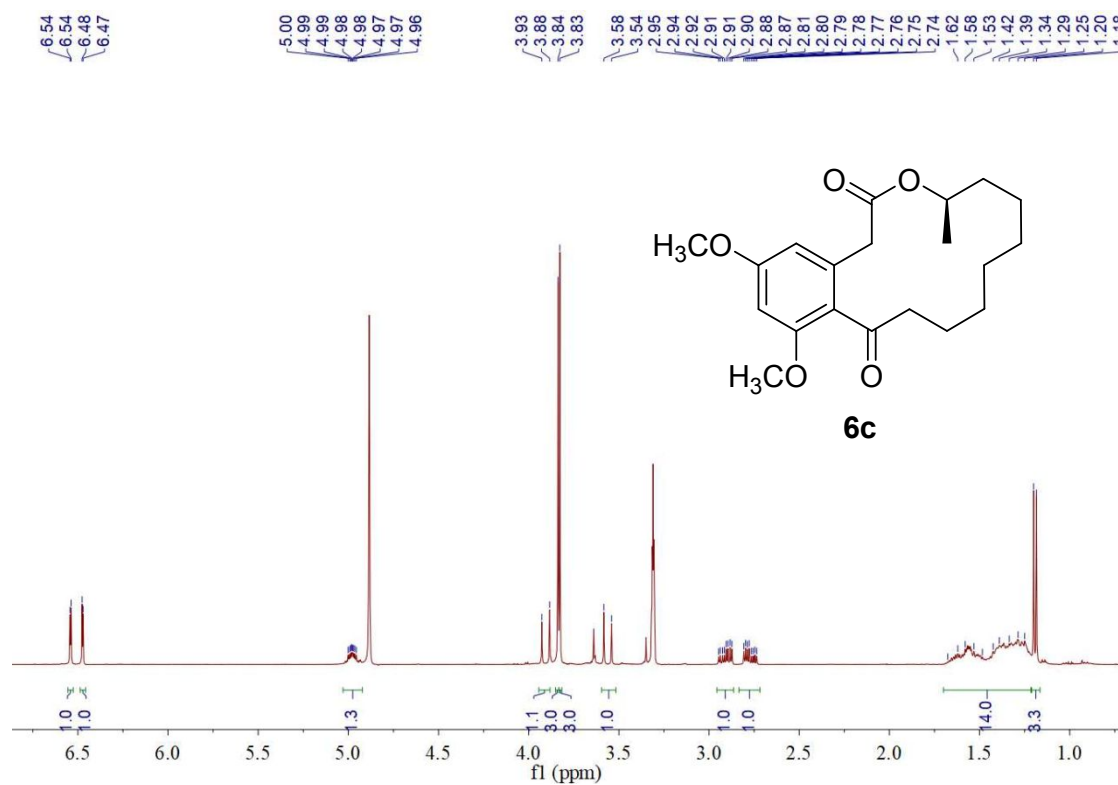

Figure S7.59.  $^1\text{H}$  NMR spectrum of compound **6c** in methanol- $d_4$

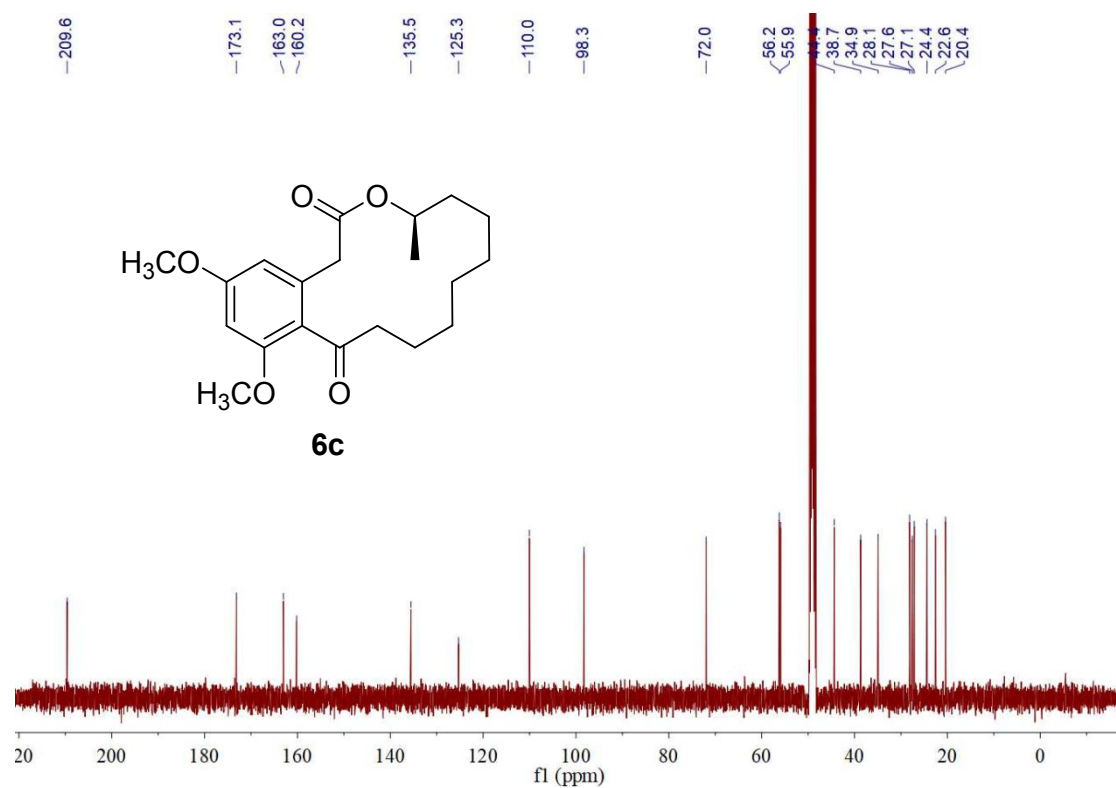

Figure S7.60.  $^{13}\text{C}$  NMR spectrum of compound **6c** in methanol- $d_4$

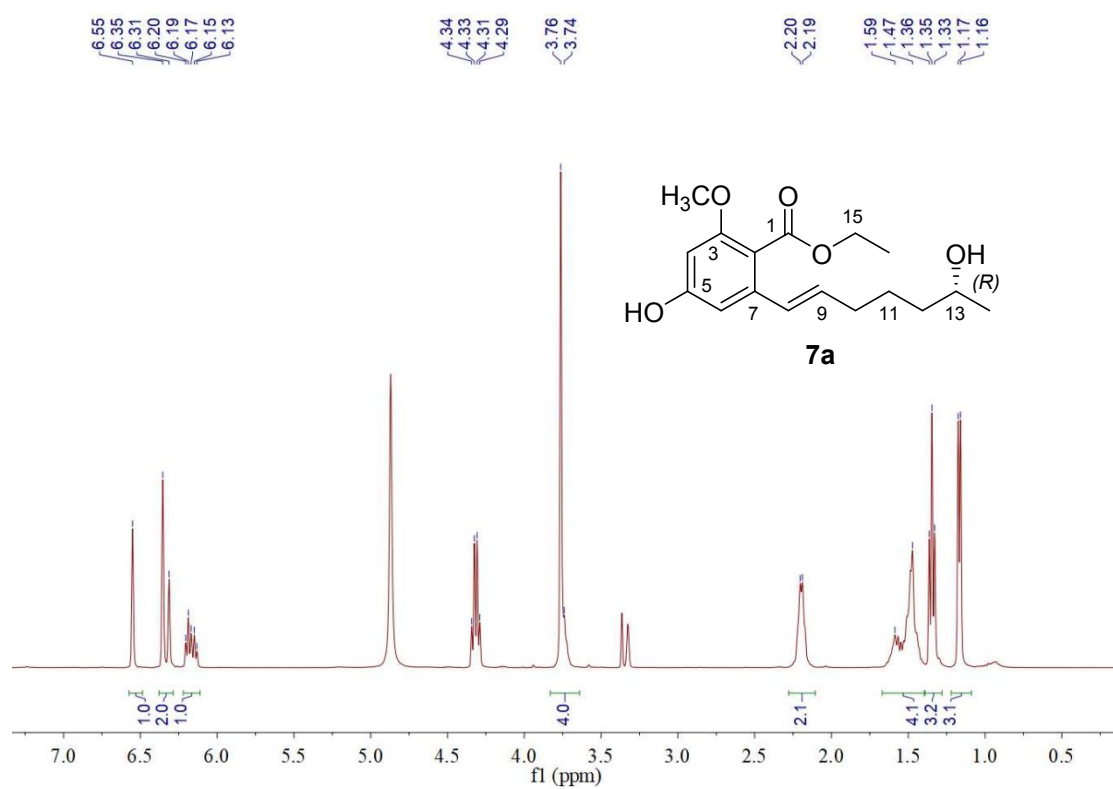

**Figure S7.61.** <sup>1</sup>H NMR spectrum of compound **7a** in methanol-*d*<sub>4</sub>

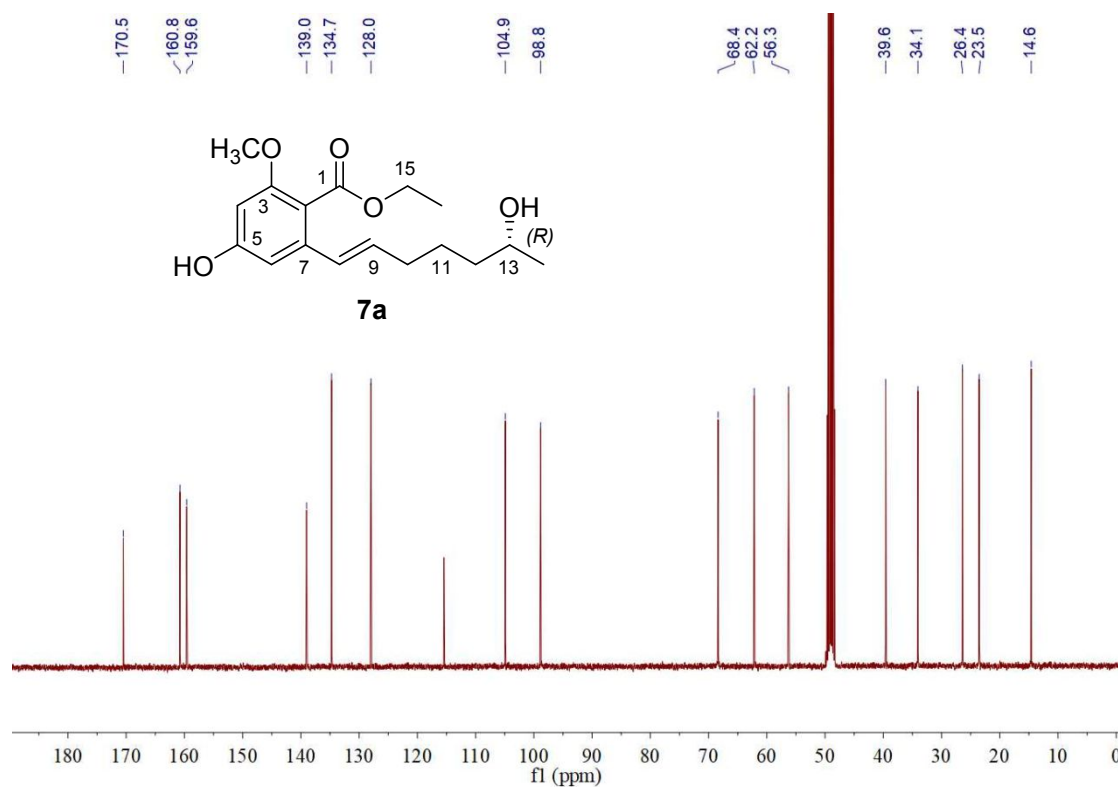

Figure S7.62. <sup>13</sup>C NMR spectrum of compound **7a** in methanol-*d*<sub>4</sub>

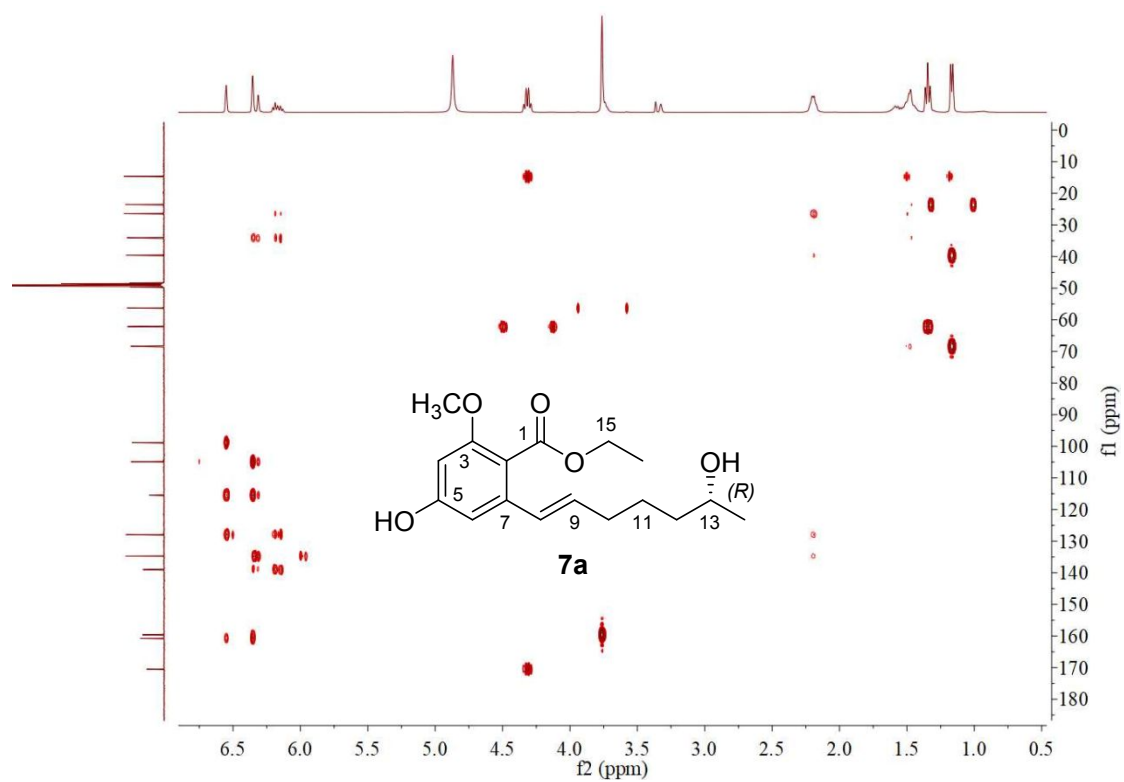

**Figure S7.63.** HMBC spectrum of compound **7a** in methanol-*d*<sub>4</sub>



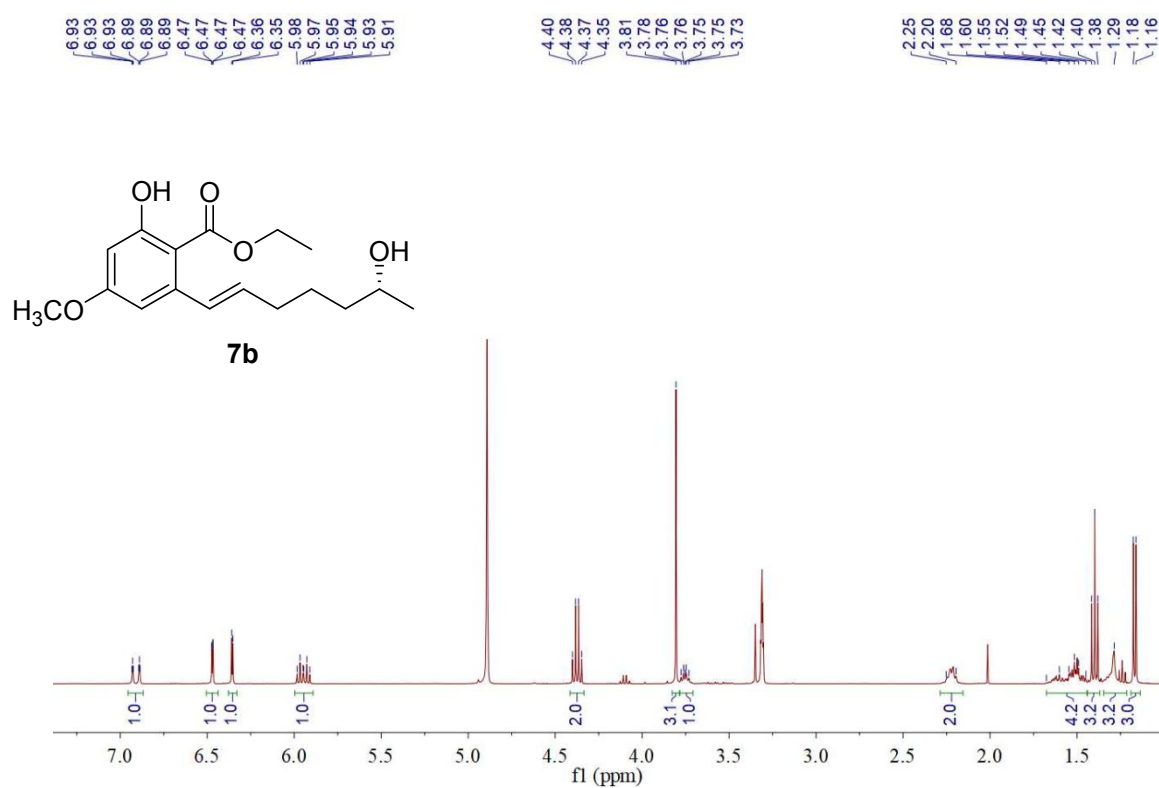

Figure S7.64.  $^1\text{H}$  NMR spectrum of compound **7b** in methanol- $d_4$

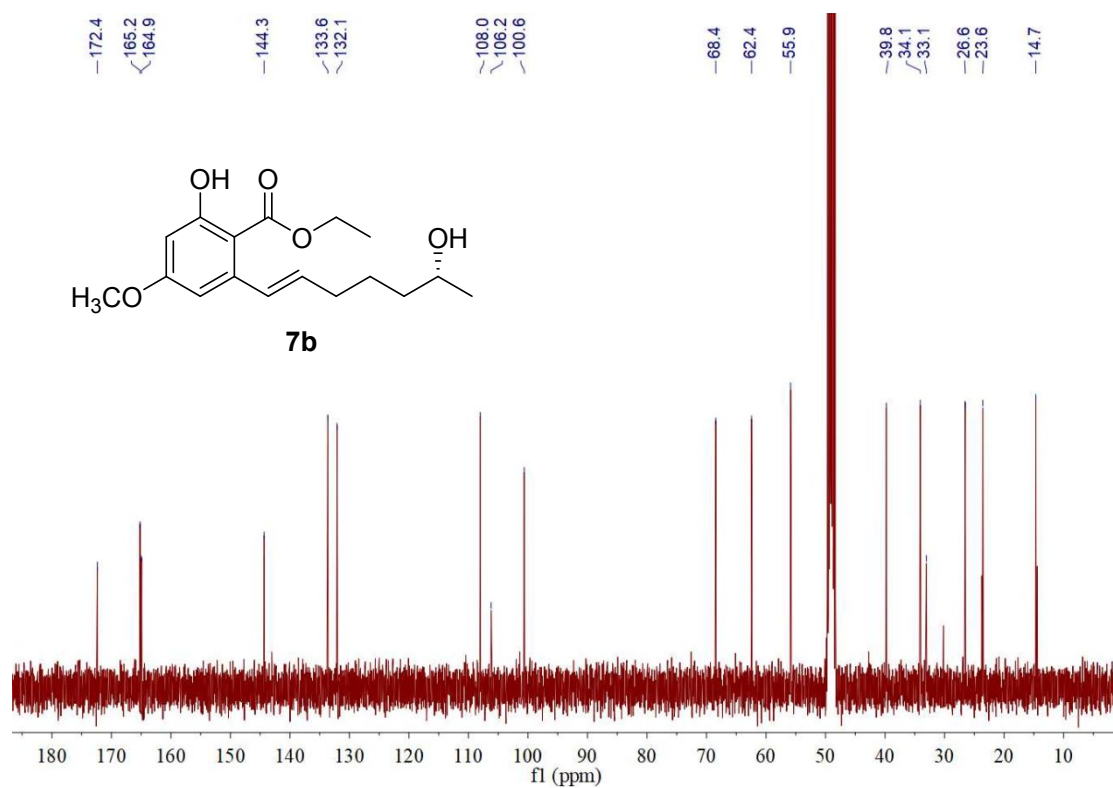

Figure S7.65. <sup>13</sup>C NMR spectrum of compound **7b** in methanol-*d*<sub>4</sub>

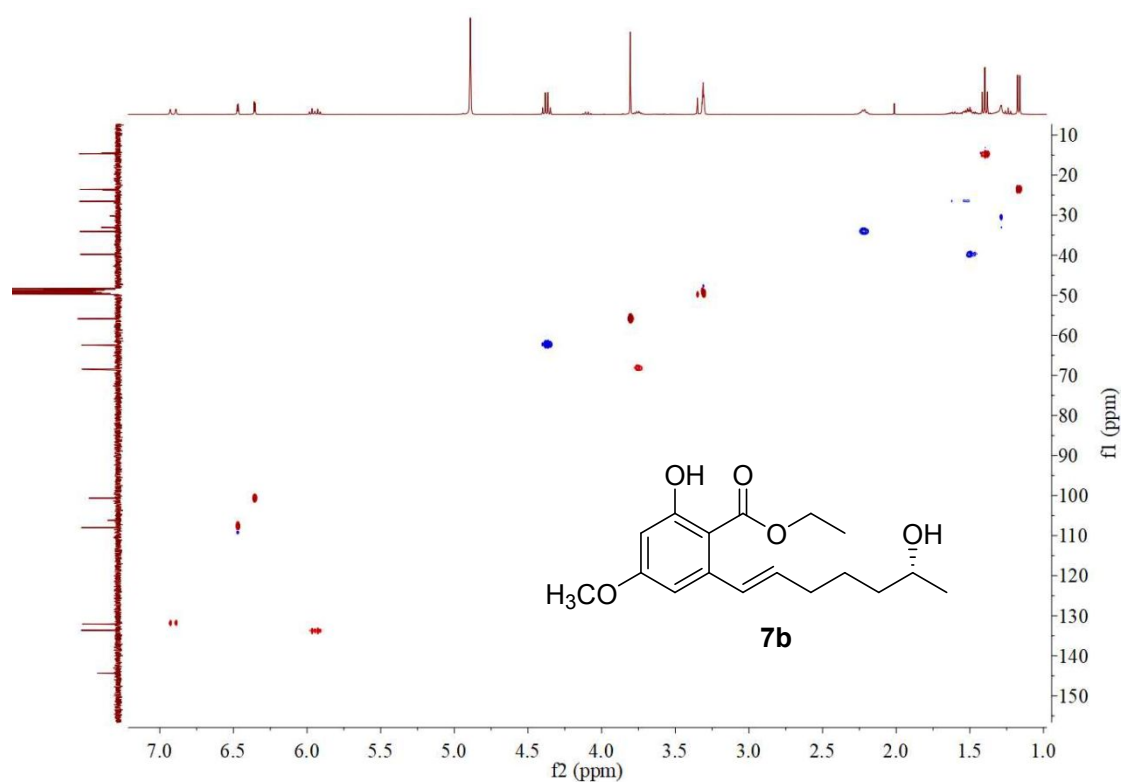

**Figure S7.66.** HSQC spectrum of compound **7b** in methanol-*d*<sub>4</sub>

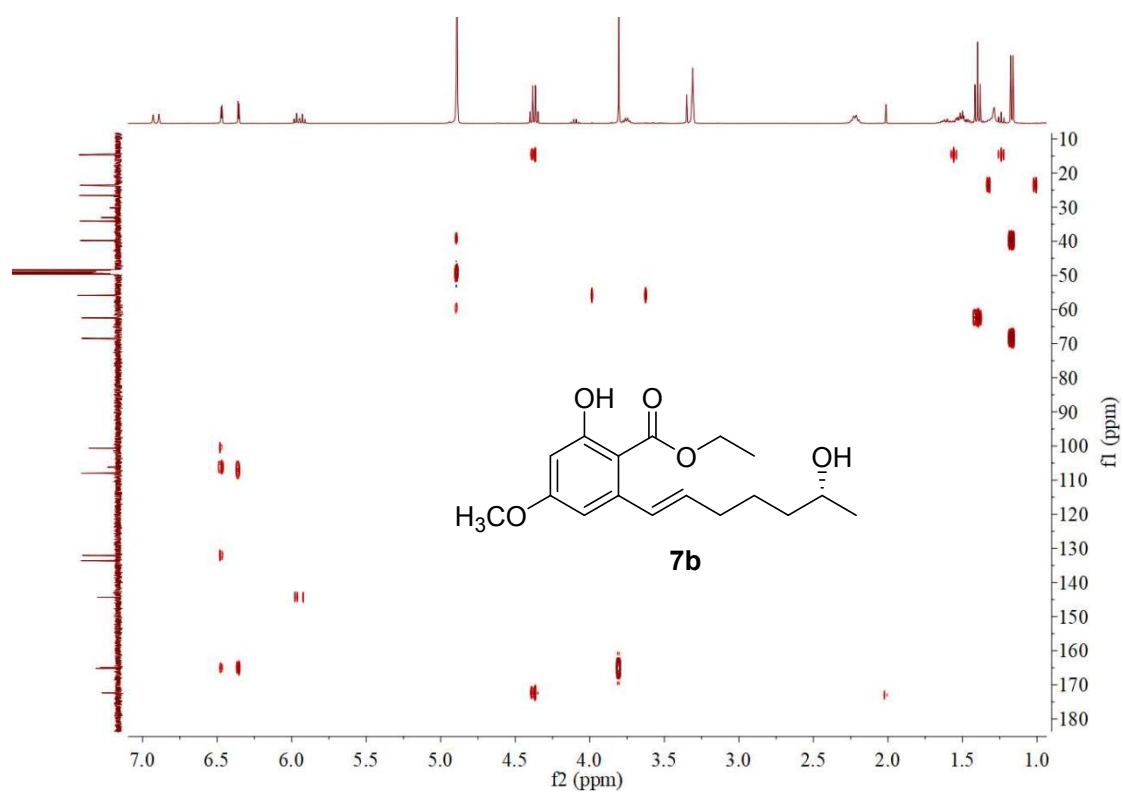

**Figure S7.67.** HMBC spectrum of compound **7b** in methanol-*d*<sub>4</sub>

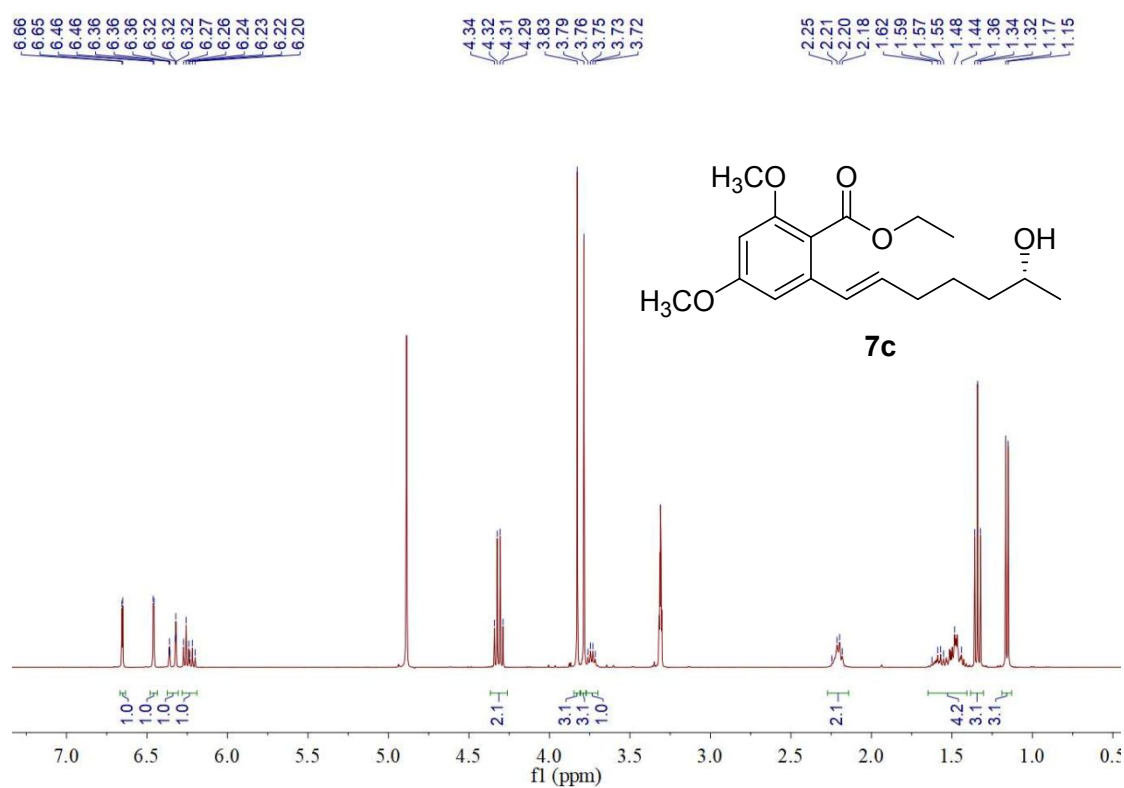

**Figure S7.68.**  $^1\text{H}$  NMR spectrum of compound **7c** in methanol- $d_4$

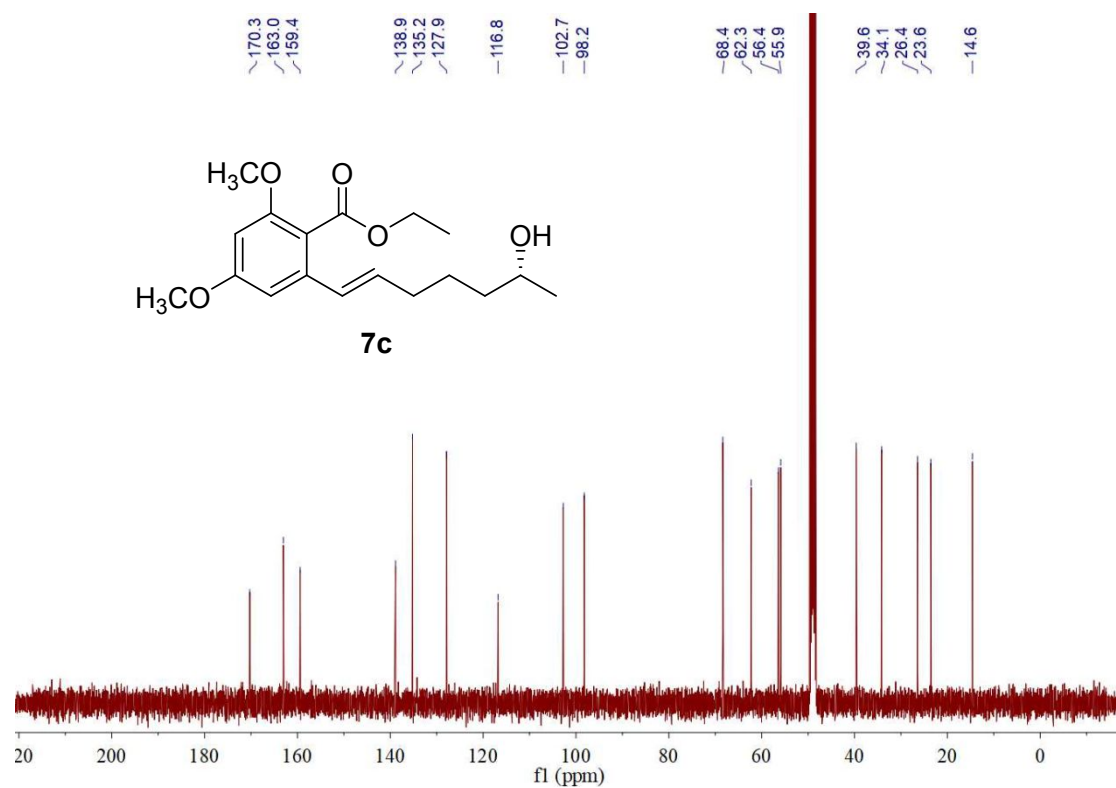

Figure S7.69.  $^{13}\text{C}$  NMR spectrum of compound **7c** in methanol- $d_4$

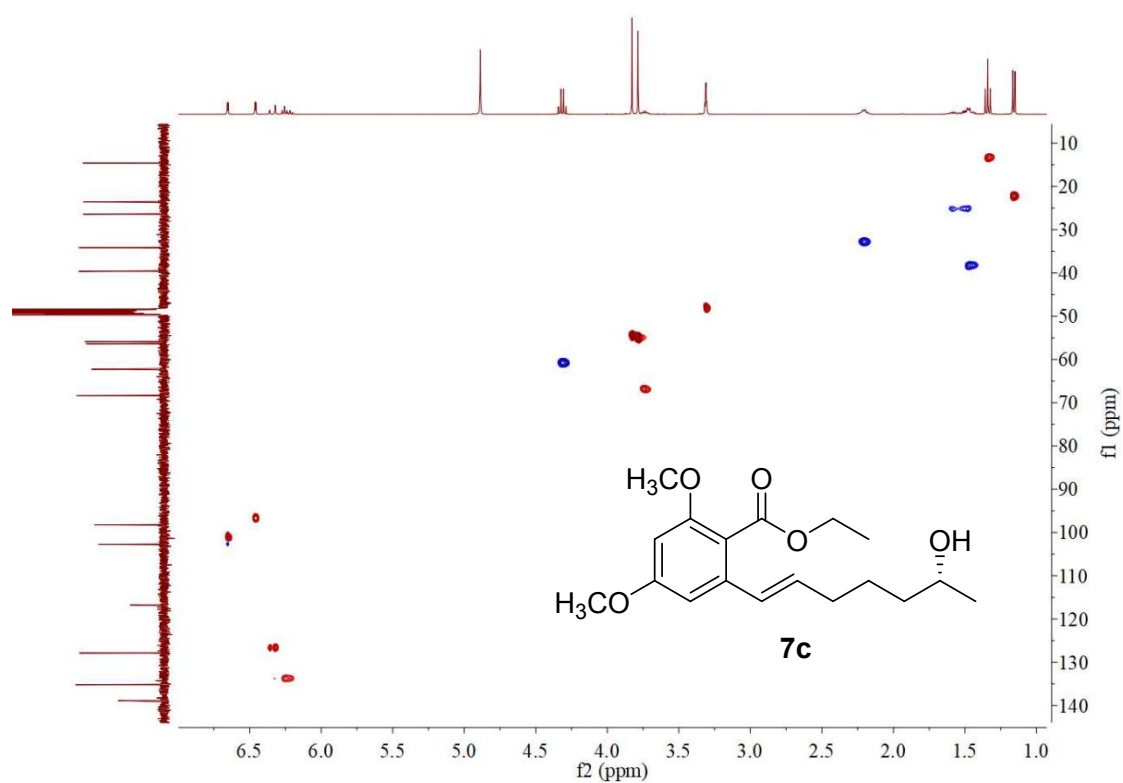

**Figure S7.70.** HSQC spectrum of compound **7c** in methanol-*d*<sub>4</sub>

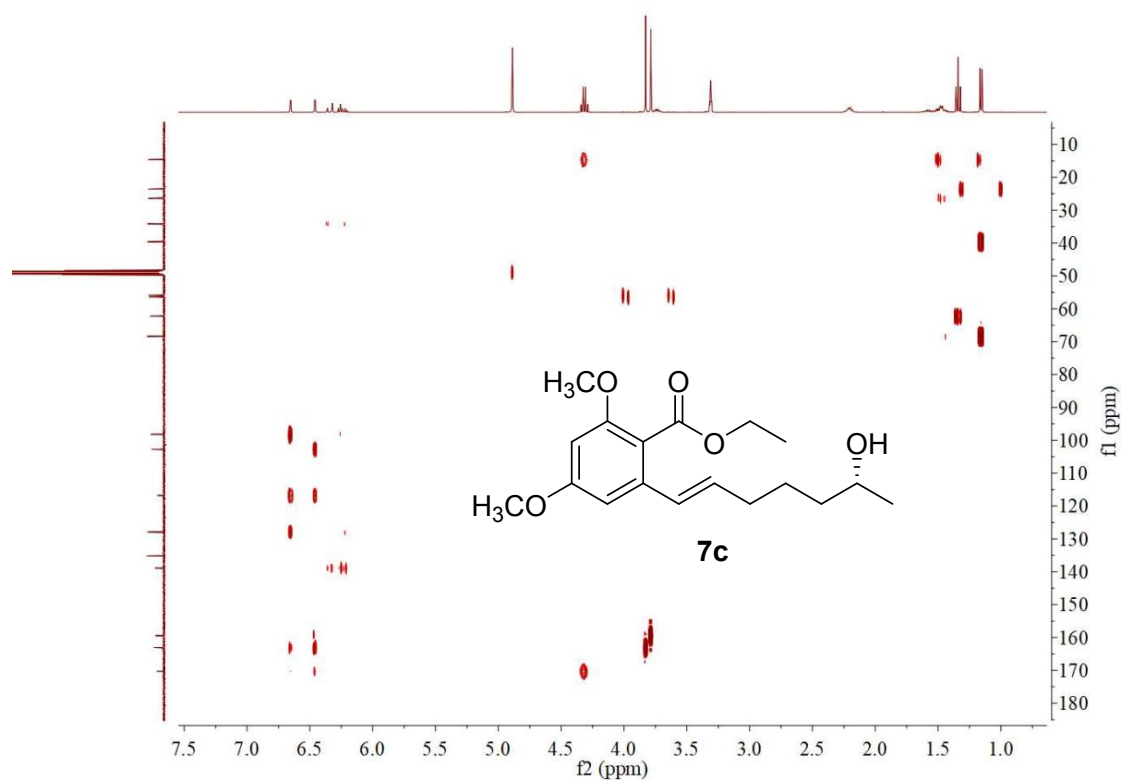

**Figure S7.71.** HMBC spectrum of compound **7c** in methanol- $d_4$



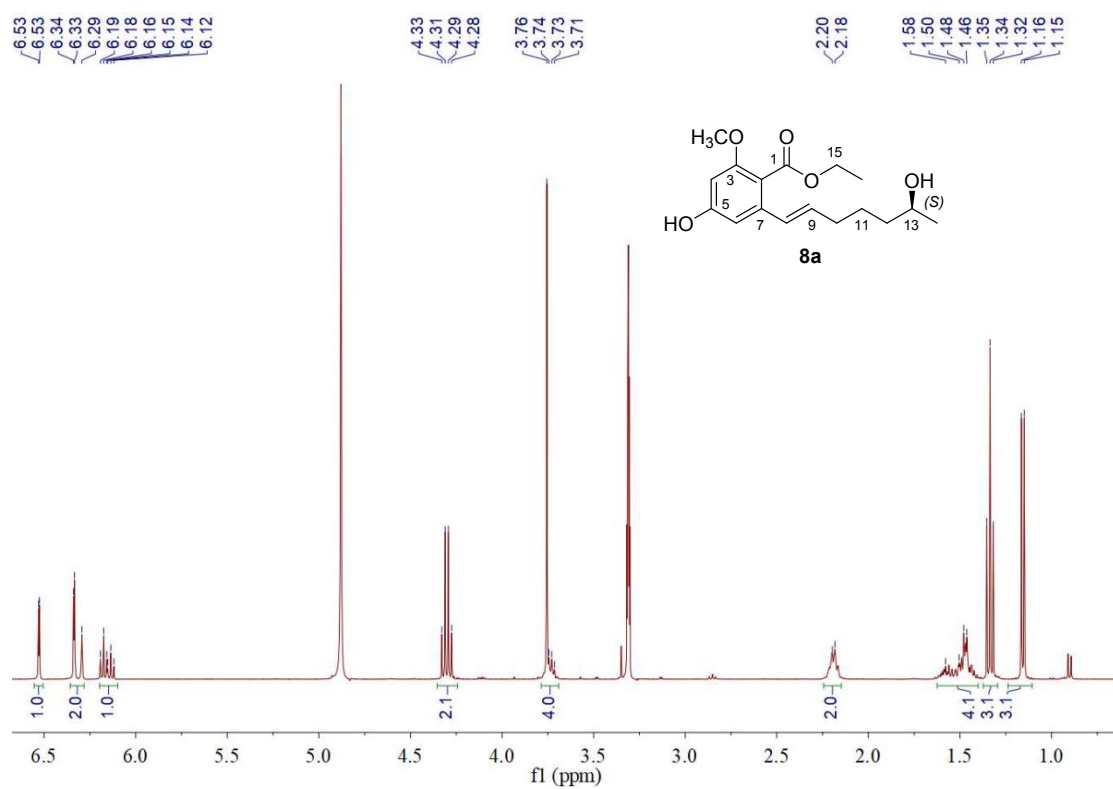

**Figure S7.72.** <sup>1</sup>H NMR spectrum of compound **8a** in methanol-*d*<sub>4</sub>

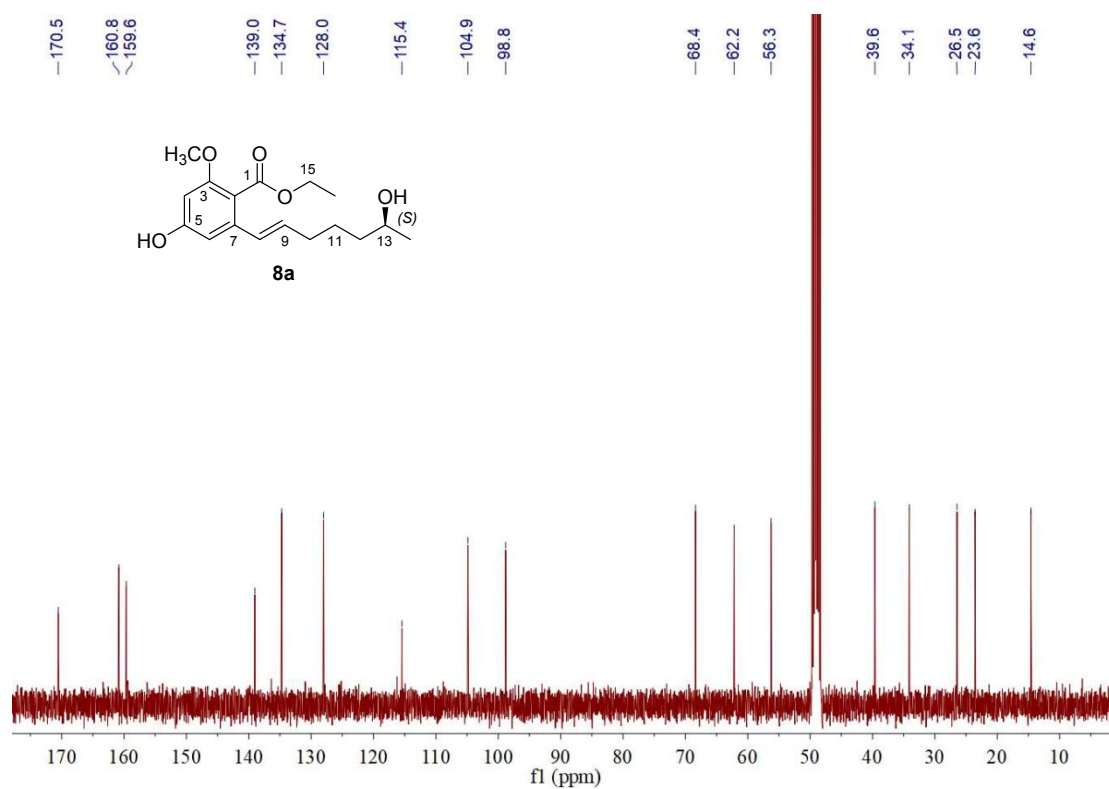

**Figure S7.73.**  $^{13}\text{C}$  NMR spectrum of compound **8a** in methanol- $d_4$

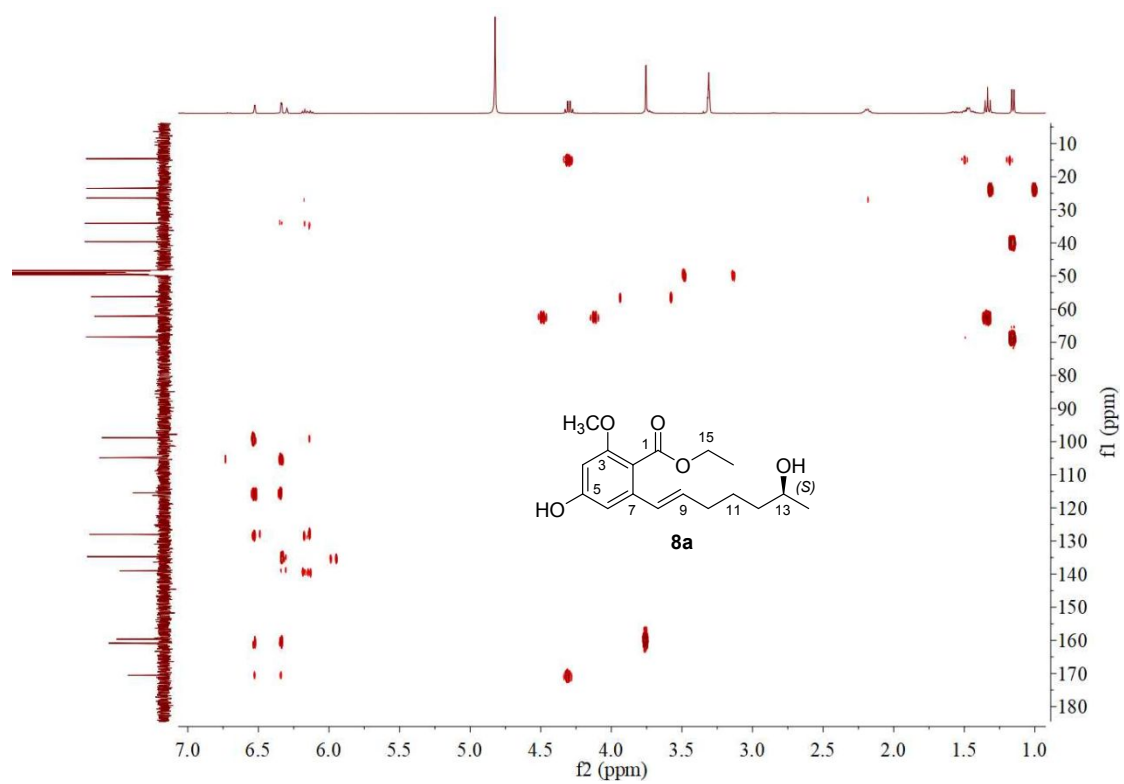

**Figure S7.74.** HMBC NMR spectrum of compound **8a** in methanol- $d_4$

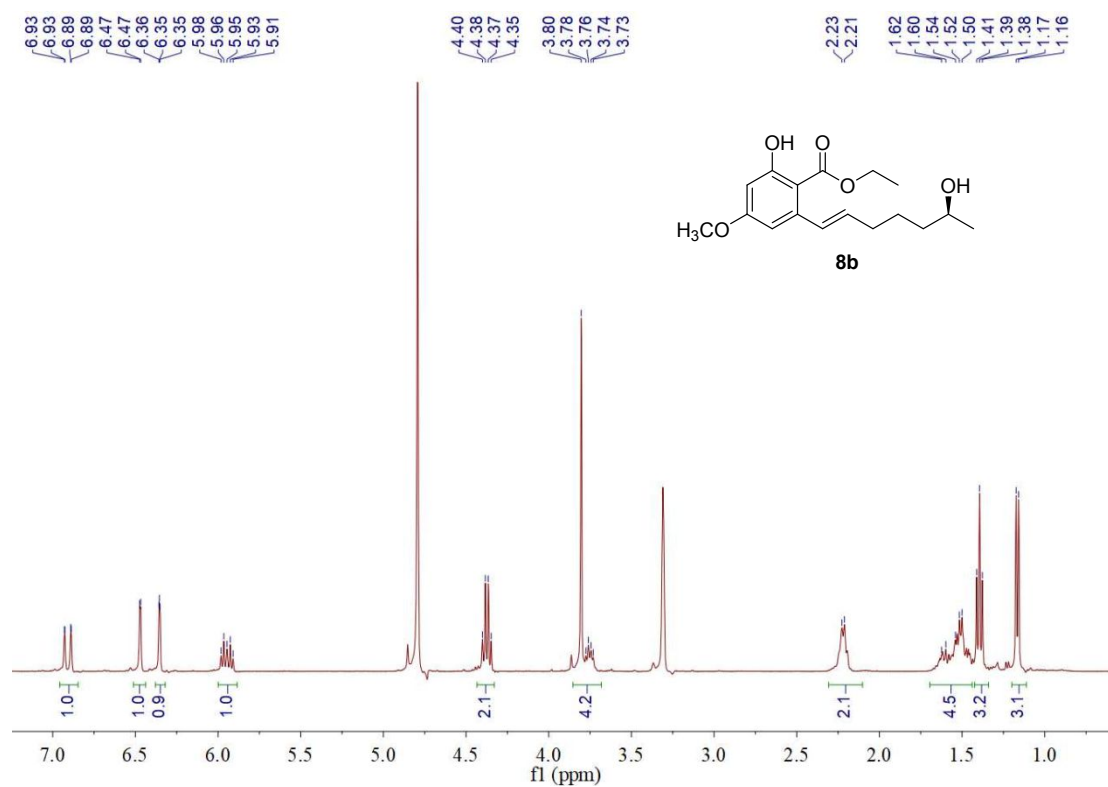

**Figure S7.75.** <sup>1</sup>H NMR spectrum of compound **8b** in methanol-*d*<sub>4</sub>

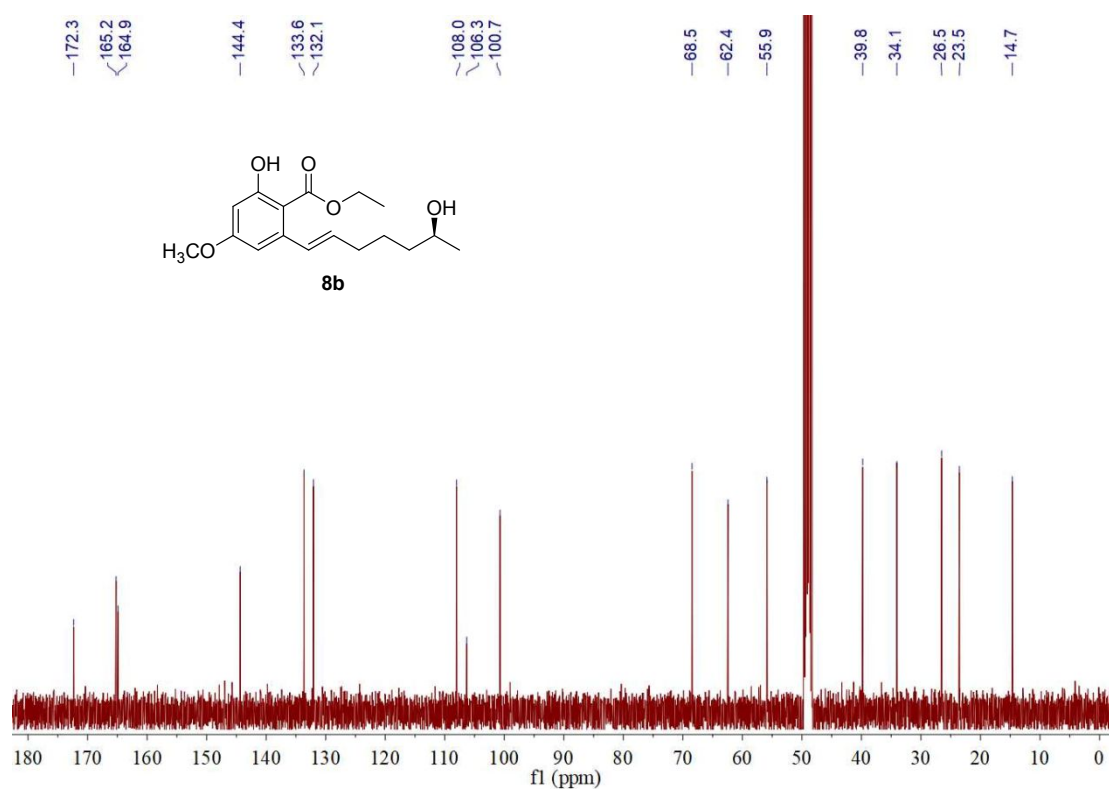

**Figure S7.76.** <sup>13</sup>C NMR spectrum of compound **8b** in methanol-*d*<sub>4</sub>

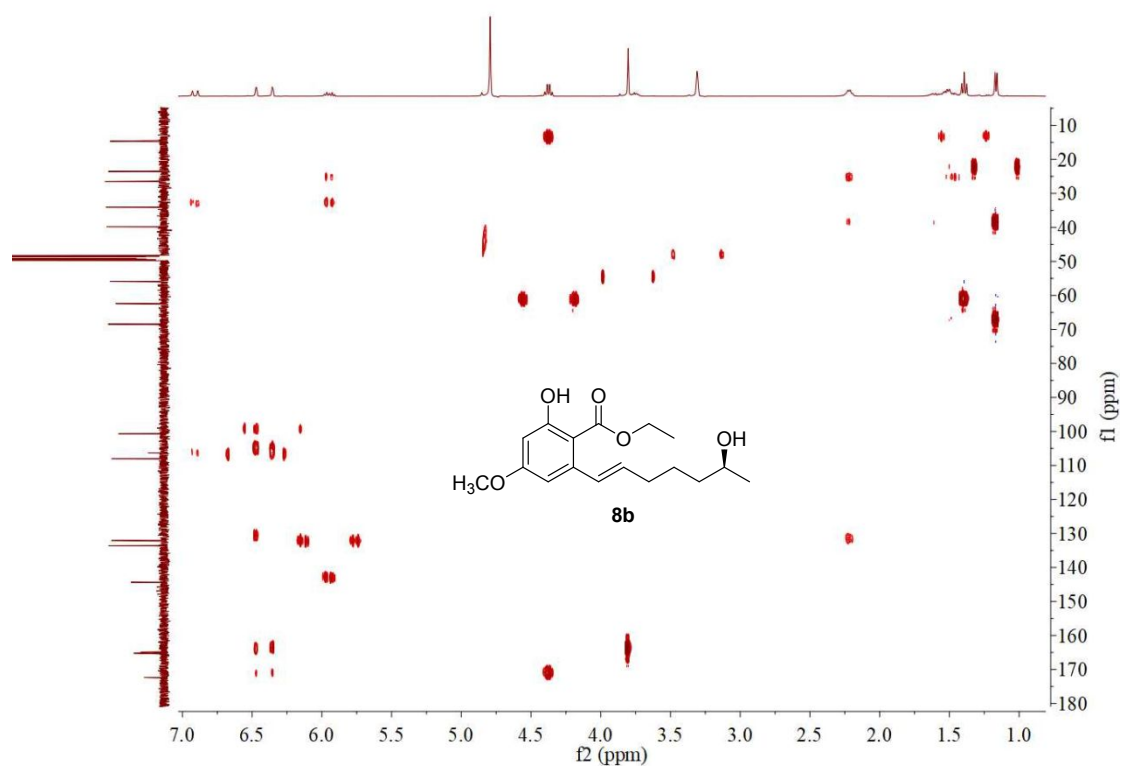

**Figure S7.77.** HMBC spectrum of compound 8b in methanol- $d_4$

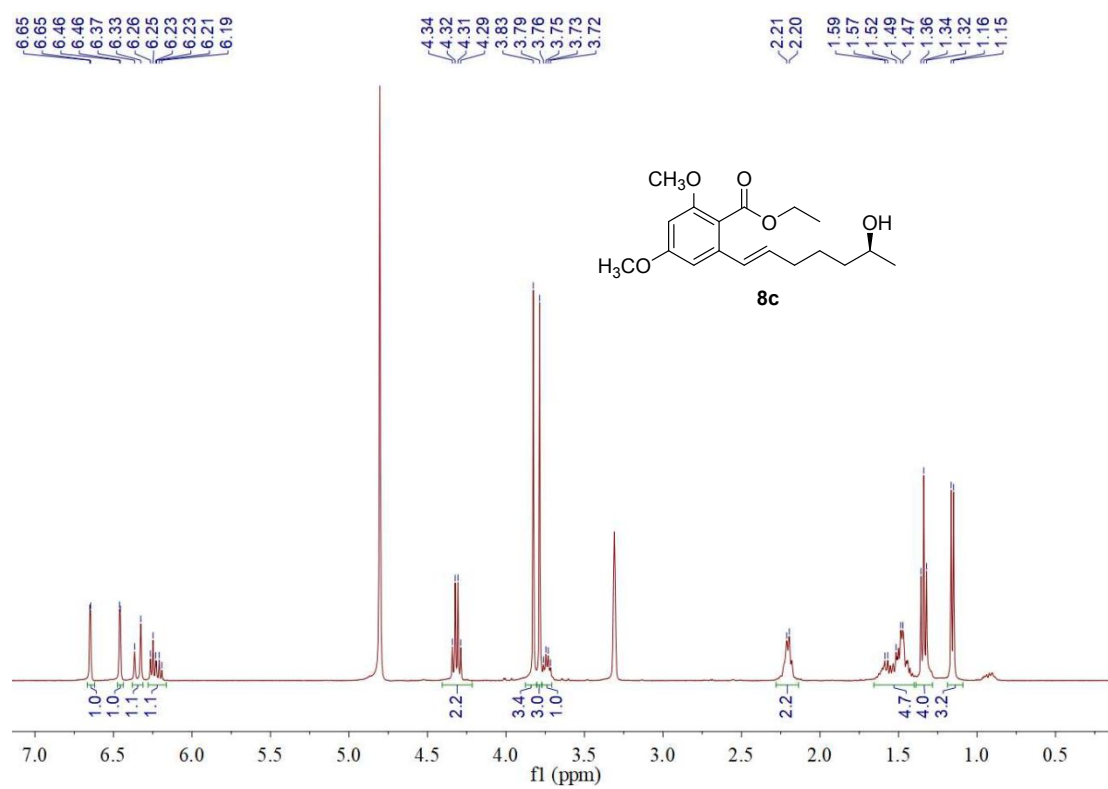

**Figure S7.78.**  $^1\text{H}$  NMR spectrum of compound **8c** in methanol- $d_4$

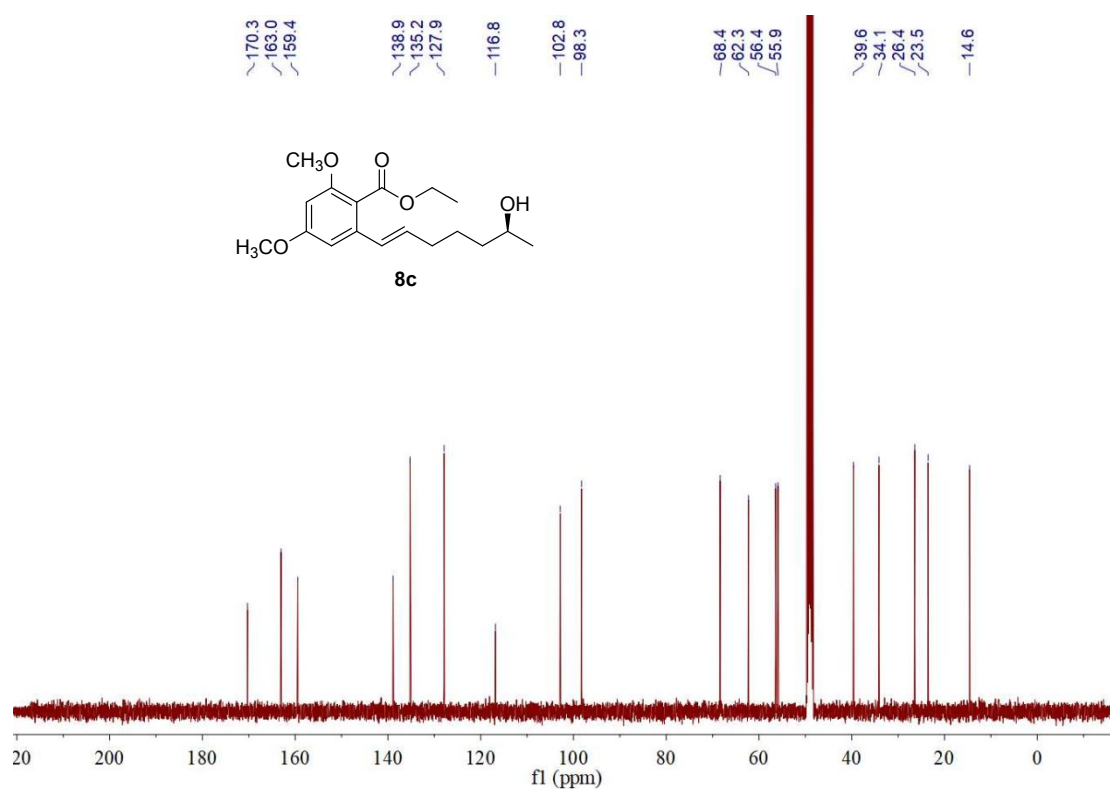

**Figure S7.79.**  $^{13}\text{C}$  NMR spectrum of compound **8c** in methanol- $d_4$



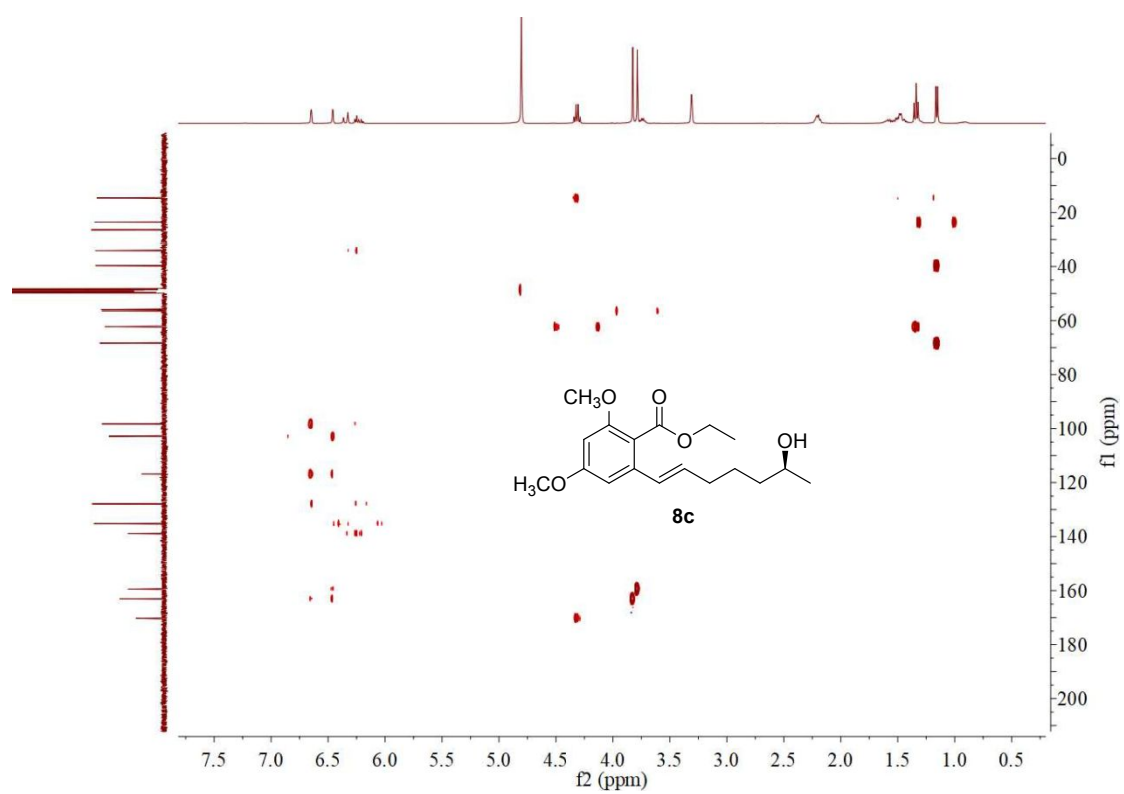

**Figure S7.80.** HMBC spectrum of compound 8c in methanol- $d_4$

**Figure S8. CD spectra of ARA7 and ARA8.**

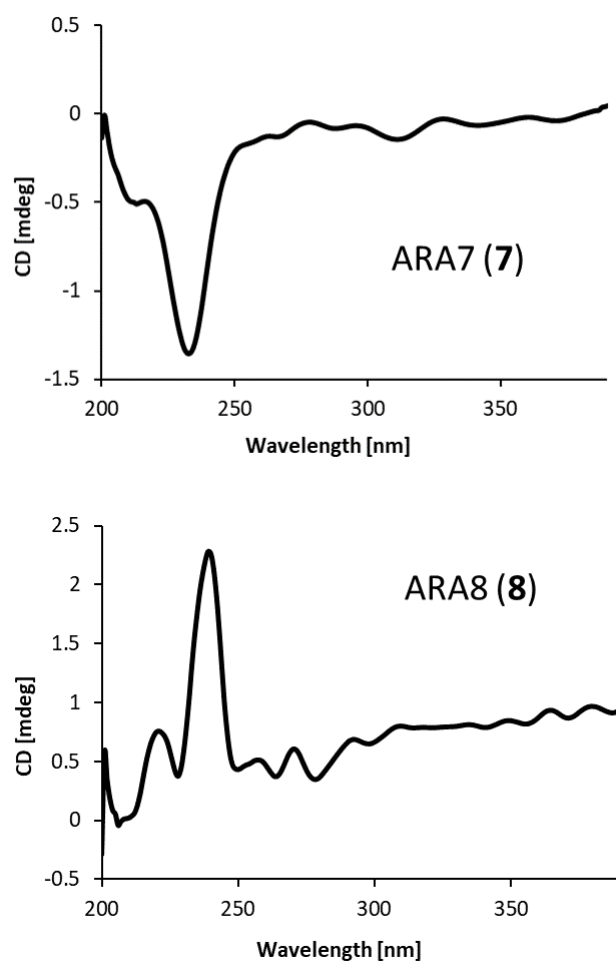

## 4 SI References.

1. Xu, Y.; Zhou, T.; Espinosa-Artiles, P.; Tang, Y.; Zhan, J.; Molnár, I. Insights into the biosynthesis of 12-membered resorcylic acid lactones from heterologous production in *Saccharomyces cerevisiae*. *ACS Chem. Biol.* **2014**, *9*, 1119–1127.
2. Reeves, C. D.; Hu, Z.; Reid, R.; Kealey, J. T. Genes for biosynthesis of the fungal polyketides hypothemycin from *Hypomyces subiculosus* and radicicol from *Pochonia chlamydosporia*. *Appl. Environ. Microbiol.* **2008**, *74*, 5121–5129.
3. Xie, L.; Zhang, L.; Wang, C.; Wang, X.; Xu, Y.-M.; Yu, H.; Wu, P.; Li, S.; Han, L.; Gunatilaka, A. L.; Wei, X.; Lin, M.; Molnár, I.; Xu, Y. Methylglucosylation of aromatic amino and phenolic moieties of drug-like biosynthons by combinatorial biosynthesis. *Proc. Natl. Acad. Sci. U.S.A.* **2018**, *115*, E4980–E4989.
4. Bai, J.; Lu, Y.; Xu, Y.-M.; Zhang, W.; Chen, M.; Lin, M.; Gunatilaka, A. L.; Xu, Y.; Molnár, I. Diversity-oriented combinatorial biosynthesis of hybrid polyketide scaffolds from azaphilone and benzenediol lactone biosynthons. *Org. Lett.* **2016**, *18*, 1262–1265.
5. Xu, Y.; Zhou, T.; Zhang, S.; Espinosa-Artiles, P.; Wang, L.; Zhang, W.; Lin, M.; Gunatilaka, A. L.; Zhan, J.; Molnár, I. Diversity-oriented combinatorial biosynthesis of benzenediol lactone scaffolds by subunit shuffling of fungal polyketide synthases. *Proc. Natl. Acad. Sci. U.S.A.* **2014**, *111*, 12354–12359.
6. Xu, Y.; Zhou, T.; Zhou, Z.; Su, S.; Roberts, S. A.; Montfort, W. R.; Zeng, J.; Chen, M.; Zhang, W.; Lin, M.; Zhan, J.; Molnár, I. Rational reprogramming of fungal polyketide first-ring cyclization. *Proc. Natl. Acad. Sci. U.S.A.* **2013**, *110*, 5398–5403.
7. Xu, Y.; Zhou, T.; Zhang, S.; Xuan, L. J.; Zhan, J.; Molnár, I. Thioesterase domains of fungal nonreducing polyketide synthases act as decision gates during combinatorial biosynthesis. *J. Am. Chem. Soc.* **2013**, *135*, 10783–10791.
8. Wang, S.; Xu, Y.; Maine, E. A.; Wijeratne, E. K.; Espinosa-Artiles, P.; Gunatilaka, A. L.; Molnár, I. Functional characterization of the biosynthesis of radicicol, an Hsp90 inhibitor resorcylic acid lactone from *Chaetomium chiversii*. *Chem. Biol.* **2008**, *15*, 1328–1338.
9. Ma, S. M.; Li, J. W.-H.; Choi, J. W.; Zhou, H.; Lee, K. M.; Moorthie, V. A.; Xie, X.; Kealey, J. T.; Silva, N. A. D.; Vederas, J. C.; Tang, Y. Complete reconstitution of a highly reducing iterative polyketide synthase. *Science*. **2009**, *326*, 589–592.
10. Gietz, R. D.; Woods, R. A. Genetic transformation of yeast. *Biotechniques*. **2001**, *30*, 816–+.
11. Biasini, M.; Bienert, S.; Waterhouse, A.; Arnold, K.; Studer, G.; Schmidt, T.; Kiefer, F.; Cassarino, T. G.; Bertoni, M.; Bordoli, L.; Schwede, T. SWISS-MODEL: modelling protein tertiary and quaternary structure using evolutionary information. *Nucleic. Acids Res.* **2014**, *42*, W252–258.
12. Singh, S.; Chang, A.; Goff, R. D.; Bingman, C. A.; Grünschow, S.; Sherman, D. H.; Phillips, G. N., Jr.; Thorson, J. S. Structural characterization of the mitomycin 7-O-methyltransferase. *Proteins*. **2011**, *79*, 2181–2188.
13. Holm, L.; Laakso, L. M. Dali server update. *Nucleic. Acids Res.* **2016**, *44*, W351–355.
14. Gaffoor, I.; Brown, D. W.; Plattner, R.; Proctor, R. H.; Qi, W.; Trail, F. Functional analysis of the polyketide synthase genes in the filamentous fungus *Gibberella zeae* (anamorph *Fusarium graminearum*). *Eukaryot Cell*. **2005**, *4*, 1926–1933.

15. Kim, Y. T.; Lee, Y. R.; Jin, J.; Han, K. H.; Kim, H.; Kim, J. C.; Lee, T.; Yun, S. H.; Lee, Y. W. Two different polyketide synthase genes are required for synthesis of zearalenone in *Gibberella zeae*. *Mol Microbiol.* **2005**, *58*, 1102-1113.
